# Supplementary material
Source: PubMed Central journal article supplement (PMC4245044)
Supplement: supp_ddu401_ddu401supp_data.pdf [file supp_ddu401_ddu401supp_data.pdf]

## Supplemental Materials

### Working Groups

#### **CHARGE** (Cohorts for Heart and Aging Research in Genome Epidemiology)

Sampath Arepalli, Stefania Bandinelli, Alessandro Biffi, Joshua C. Bis, Eric Boerwinkle, Aravinda Chakravarti, Ming-Huei Chen, Sean Chong, Josef Coresh, David J. Couper, L. Adrienne Cupples, Abbas Dehghan, Angela Do'ring, Gudny Eiriksdottir, Janine F. Felix, Luigi Ferrucci, Aaron R. Folsom, Caroline S. Fox, Timothy M. Frayling, Santhi K. Ganesh, Melissa Garcia, Stephen F. Garner, Paolo Gasparini, Christian Gieger, Nicole L. Glazer, Natalia A. Goukova, Andreas Greinacher, Vilmundur Gudnason, Tamara B. Harris, Dena G. Hernandez, Albert Hofman, Thomas Illig, Yoichiro Kamatani, Naoyuki Kamatani, Michiaki Kubo, Brigitte Kuhnel, Vasiliki Lagou, Guillaume Lettre, Daniel Levi, JingPing Lin, Yongmei Liu, Dan L. Longo, Thomas Lumley, Massimo Mangino, Koichi Matsuda, Christa Meisinger, David Melzer, Stephan Menzel, Matt Moore, Yusuke Nakamura, Michael A. Nalls, Matthias Nauck, Christopher J. O'Donnell, Yukinori Okada, Ben A. Oostra, Willem H. Ouwehand, Kushang V. Patel, Nicola Pirastu, Giorgio Pistis, Holger Prokisch, Inga Prokopenko, Bruce M. Psaty, Alex P. Reiner, Augusto Rendon, Jennifer Sambrook, Andrew B. Singleton, Albert V. Smith, Nicole Soranzo, Tim D. Spector, Jonathan Stephens, Michael Stumvoll, Atsushi Takahashi, Toshiko Tanaka, Toshihiro Tanaka, Kent Taylor, Alexander Teumer, Swee Lay Thein, Anke To'njes, Daniela Toniolo, Tatsuhiko Tsunoda, Andre' G. Uitterlinden, Cornelia M. van Duijn, Frank J. A. van Rooij, Uwe Vo'lker, Henry Vo'lzke, H.-Erich Wichmann, Kerri L. Wiggins, James G. Wilson, Jacqueline C. M. Witteman, Andrew R. Wood, Kazuhiko Yamamoto, Qiong Yang, Neil A. Zakai

#### **CHARGE genotyping platforms by study:**

- *AGES-Reykjavik Study* - Illumina 370CNV BeadChip array
- *ARIC* - Affymetrix Genome-Wide Human SNP Array 6.0 platform
- *RS* - Illumina 550K BeadChip array
- *FHS* - Affymetrix 500K array and an additional gene-focused 50K array
- *inChianti* - Illumina 550K BeadChip array
- *BLSA* - Infinium II HumanHap550 v. 1, Infinium II HumanHap550 v. 3, or a composite of Infinium HumanHap300 and Infinium II 240S

#### **COGENT**

Sampath Arepalli, Melissa A. Austin, Diane M. Becker, Angela Britton, Zhao Chen, David Couper, J. David Curb, Eric Dean, Charles B. Eaton, Michele K. Evans, Aaron R. Folsom, Myriam Fornage, Santhi K. Ganesh, Struan F. A. Grant, Tamara B. Harris, Dena Hernandez, Naoyuki Kamatani, Brendan J. Keating, Michiaki Kubo, Andrea LaCroix, Leslie A. Lange, Guillaume Lettre, Simin Liu, Yongmei Liu, Kurt Lohman, Rasika Mathias, Yan Meng, Emile R. Mohler III, Solomon Musani, Yusuke Nakamura, Michael A. Nalls, Christopher J. O'Donnell, Yukinori Okada, Cameron D. Palmer, George J. Papanicolaou, Kushang V. Patel, Alexander P. Reiner, Andrew B. Singleton, Beverly M. Snively, Atsushi Takahashi, Hua Tang, Herman A. Taylor Jr., Kent Taylor, Cynthia Thomson, James G. Wilson, Lisa R. Yanek, Lingyao Yang, Elad Ziv, Alan B. Zonderman

#### **COGENT genotyping platforms by study:**

*ARIC* - Affymetrix Genome-Wide Human SNP Array 6.0 platform  
*CARDIA* - Affymetrix Genome-Wide Human SNP Array 6.0 platform  
*GeneSTAR* - Illumina BeadChip array

*HANDLS* - Illumina BeadChip array

*WHI* - Affymetrix Affymetrix Genome-Wide Human SNP Array 6.0 platform

*HealthABC* - Illumina Human1M-Duo BeadChip platform

## **RIKEN**

Koichiro Higasa, Tomomitsu Hirota, Naoya Hosono, Yoichiro Kamatani, Naoyuki Kamatani, Michiaki Kubo, Natsuhiko Kumasaka, Koichi Matsuda, Yusuke Nakamura, Hiroko Ohmiya, Yukinori Okada, Atsushi Takahashi, Mayumi Tamari, Toshiko Tanaka, Toshihiro Tanaka, Tatsuhiko Tsunoda, Yumi Yamaguchi-Kabata, Kazuhiko Yamamoto

## **Supplemental eQTL analysis**

We applied expression quantitative trait loci (eQTL) analysis to significant index SNPs using SNAP(18974171), and identified proxy SNPs in high linkage disequilibrium ( $r^2 > 0.8$ ). Index and proxy SNPs were searched for within a collected database of expression SNP (eSNP) results including the following tissues: fresh lymphocytes (17873875), fresh leukocytes (19966804), leukocyte samples in individuals with Celiac disease (19128478), whole blood samples (18344981, 21829388, 22692066), lymphoblastoid cell lines (LCL) derived from asthmatic children (17873877, 23345460), HapMap LCL from 3 populations (17873874), a separate study on HapMap CEU LCL (18193047), additional LCL population samples (19644074, 22286170, 22941192, Mangravite et al., unpublished), CD19+ B cells (22446964), primary PHA-stimulated T cells (19644074), CD4+ T cells (20833654), peripheral blood monocytes (19222302, 20502693, 22446964), CD11+ dendritic cells before and after *Mycobacterium tuberculosis* infection (22233810), omental and subcutaneous adipose (18344981, 21602305, 22941192), stomach (21602305), endometrial carcinomas (21226949), ER+ and ER- breast cancer tumor cells (23374354), brain cortex (19222302, 19361613, 22685416), pre-frontal cortex (22031444, 20351726), frontal cortex (20485568), temporal cortex (20485568, 22685416), pons (20485568), cerebellum (20485568, 22685416), 3 additional large studies of brain regions including prefrontal cortex, visual cortex and cerebellum, respectively (Emilsson, *Cell* in press), liver (18462017, 21602305, 21637794), osteoblasts (19654370), lung (23209423), skin (21129726, 22941192) and primary fibroblasts (19644074). Micro-RNA QTLs were also queried for LCL (21691150), and gluteal and abdominal adipose (22102887). The cited original papers describe the criteria of association with gene transcript levels for eSNP results. The best eSNPs associated with a transcript were further examined using DIAGRAM, and LD between the DIAGRAM-selected eSNPs and the strongest associated eSNP was compared to determine the concordance of DIAGRAM and expression signals.

## **Supplemental Figure Legends**

**Figure S1 - 11.** Locus plots for known hits. Vertical axis indicates Bayes Factor, and horizontal axes indicate both chromosomal position and gene location.

## **Supplemental Table Legends**

**Table S1.** Random-effects meta-analysis of MANTRA identified loci.

**Table S2.\*** Genome-wide summary statistics of the primary MANTRA analyses of Monocyte, Neutrophil, and White Blood Cell counts.

**Table S3.** Credible regions identified from MANTRA top hits are listed.

**Table S4.** Summarized eQTL analysis are reported.

\*Located as a linked file through HMG's sharing site.

# Chromosome 17 – White Blood Cells

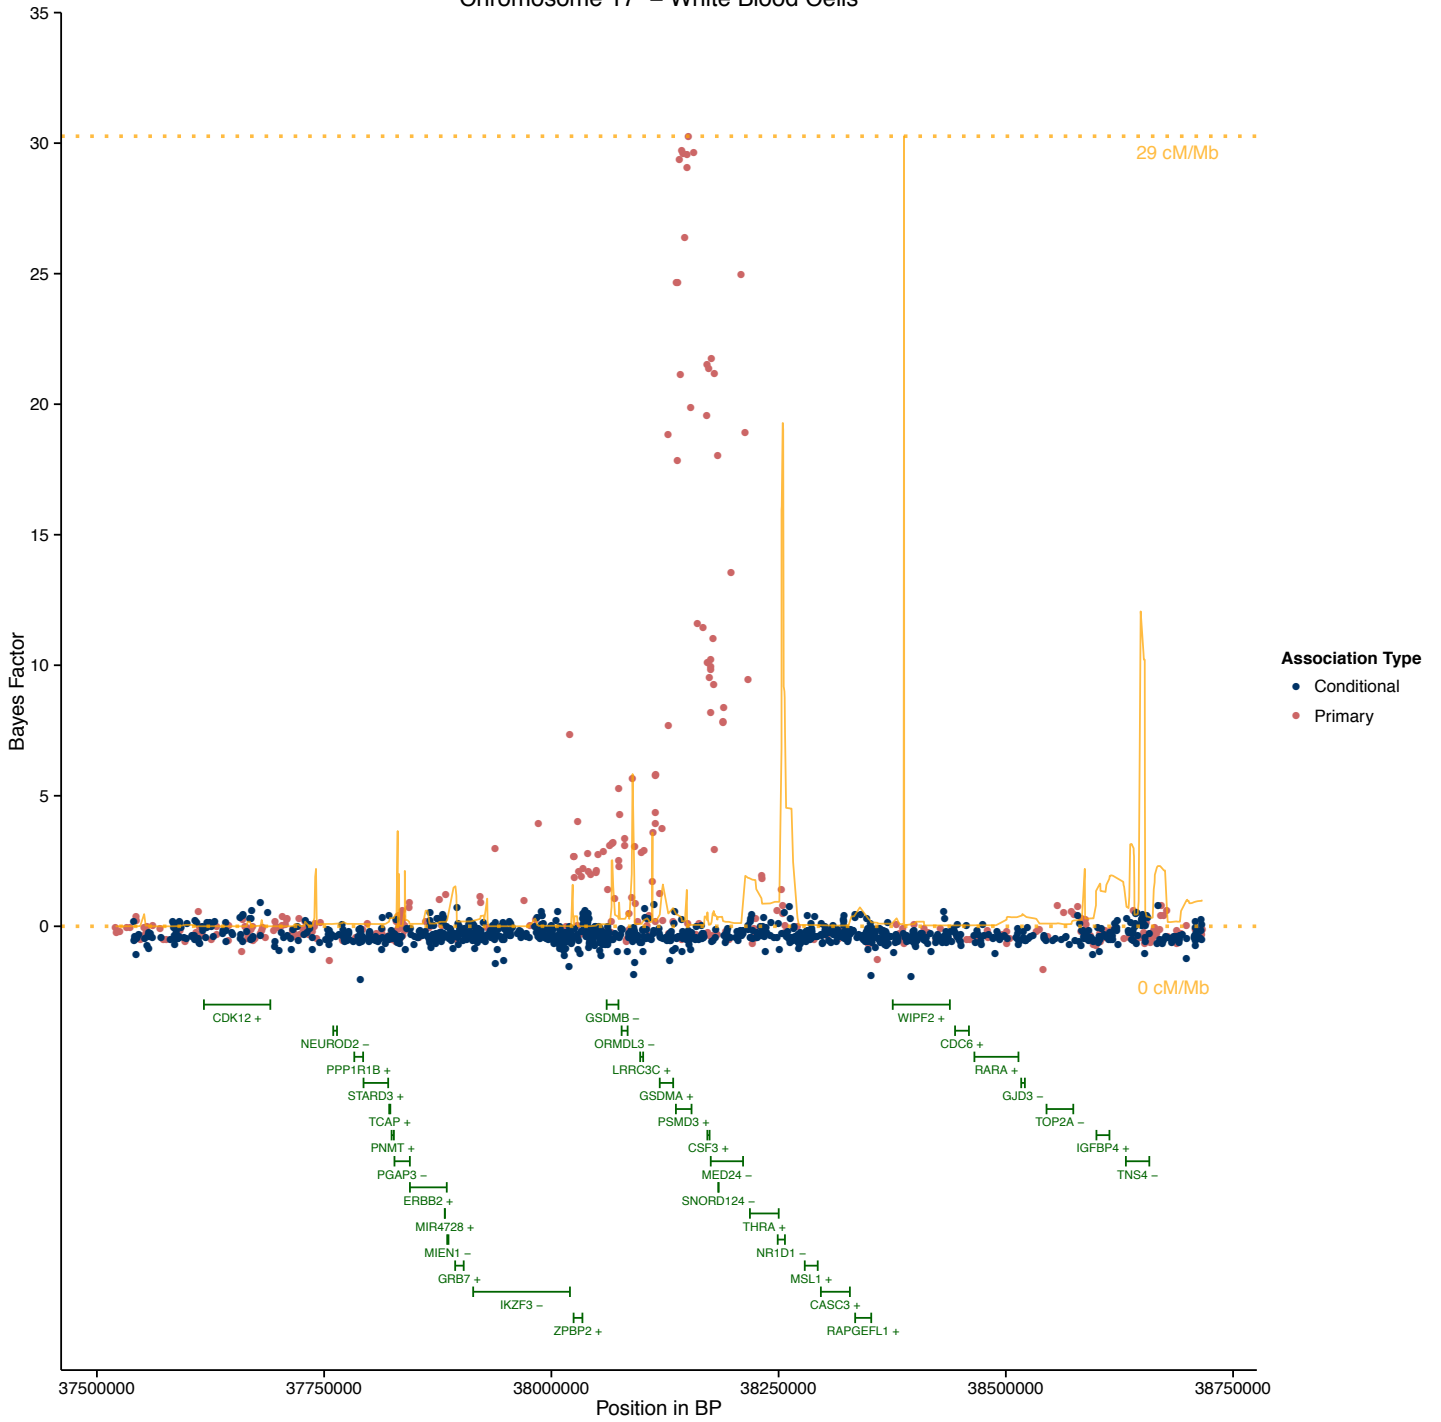

# Chromosome 7 – White Blood Cells

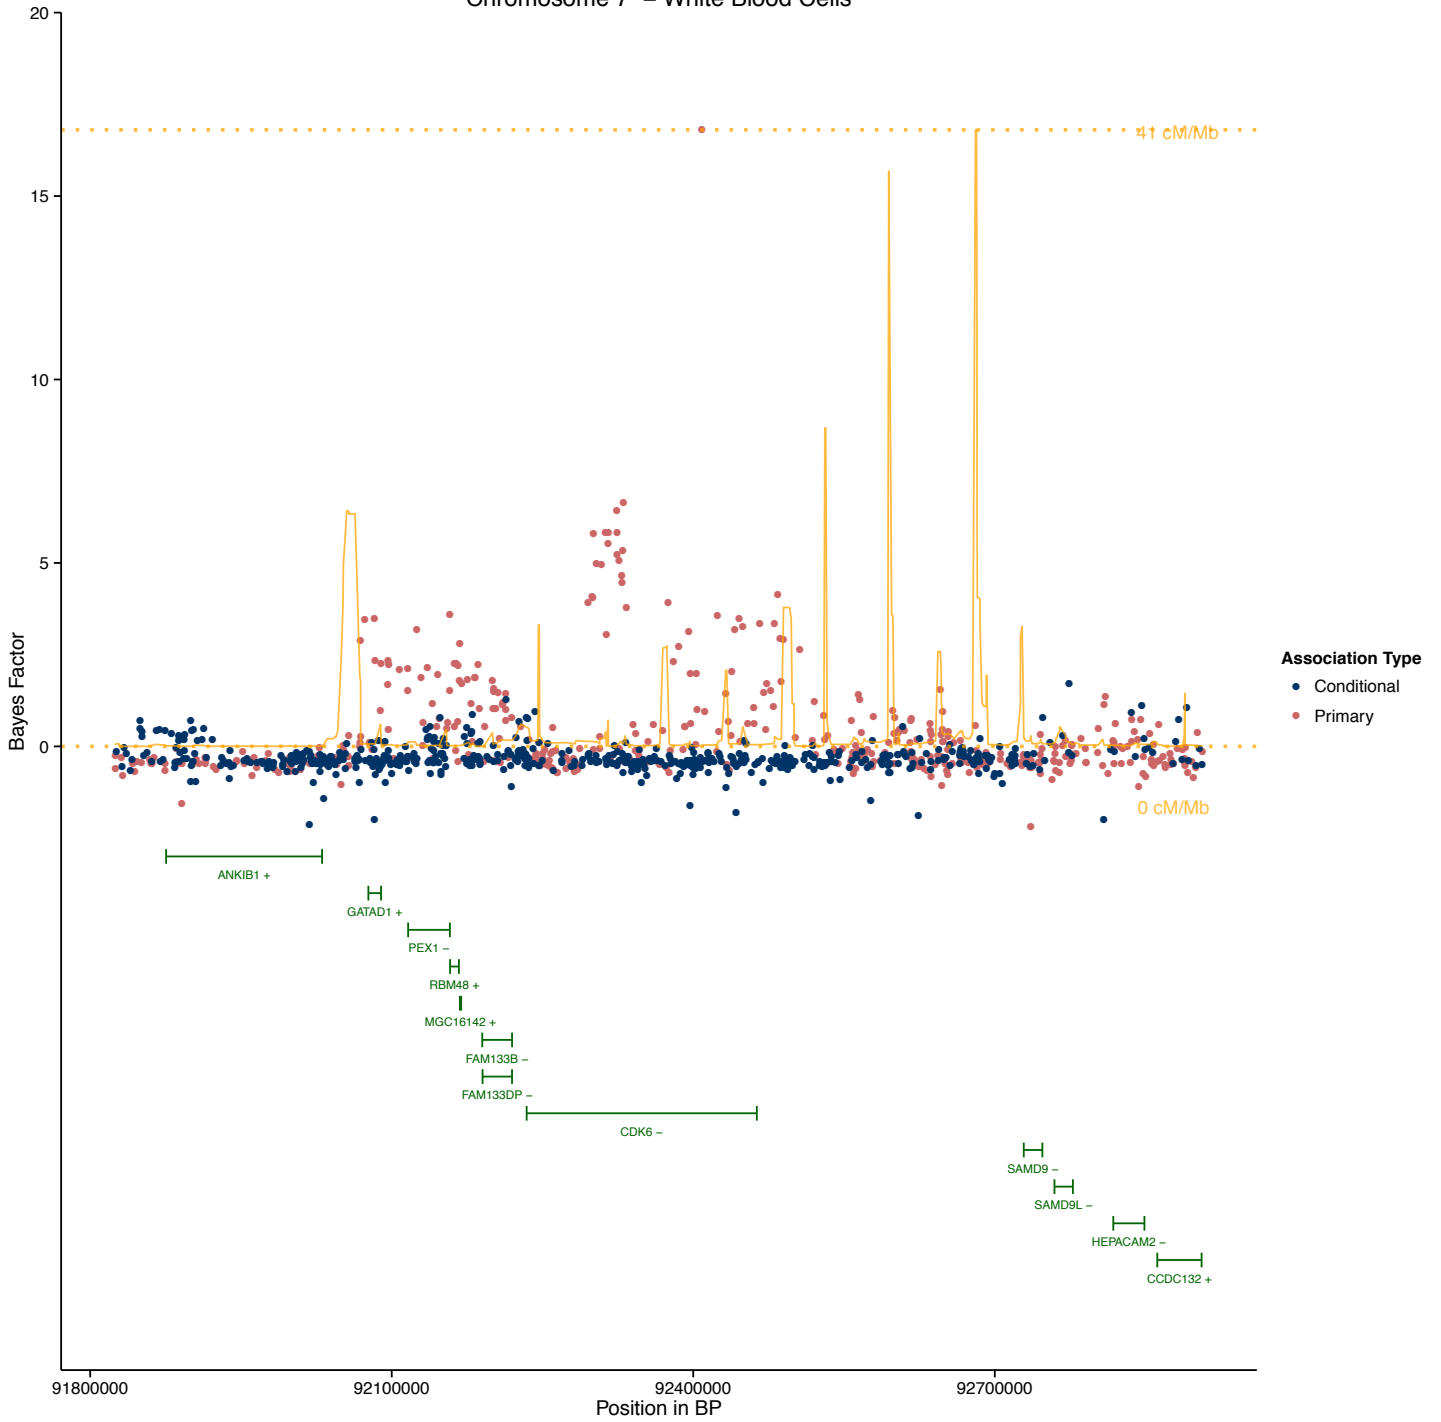

# Chromosome 6 – White Blood Cells

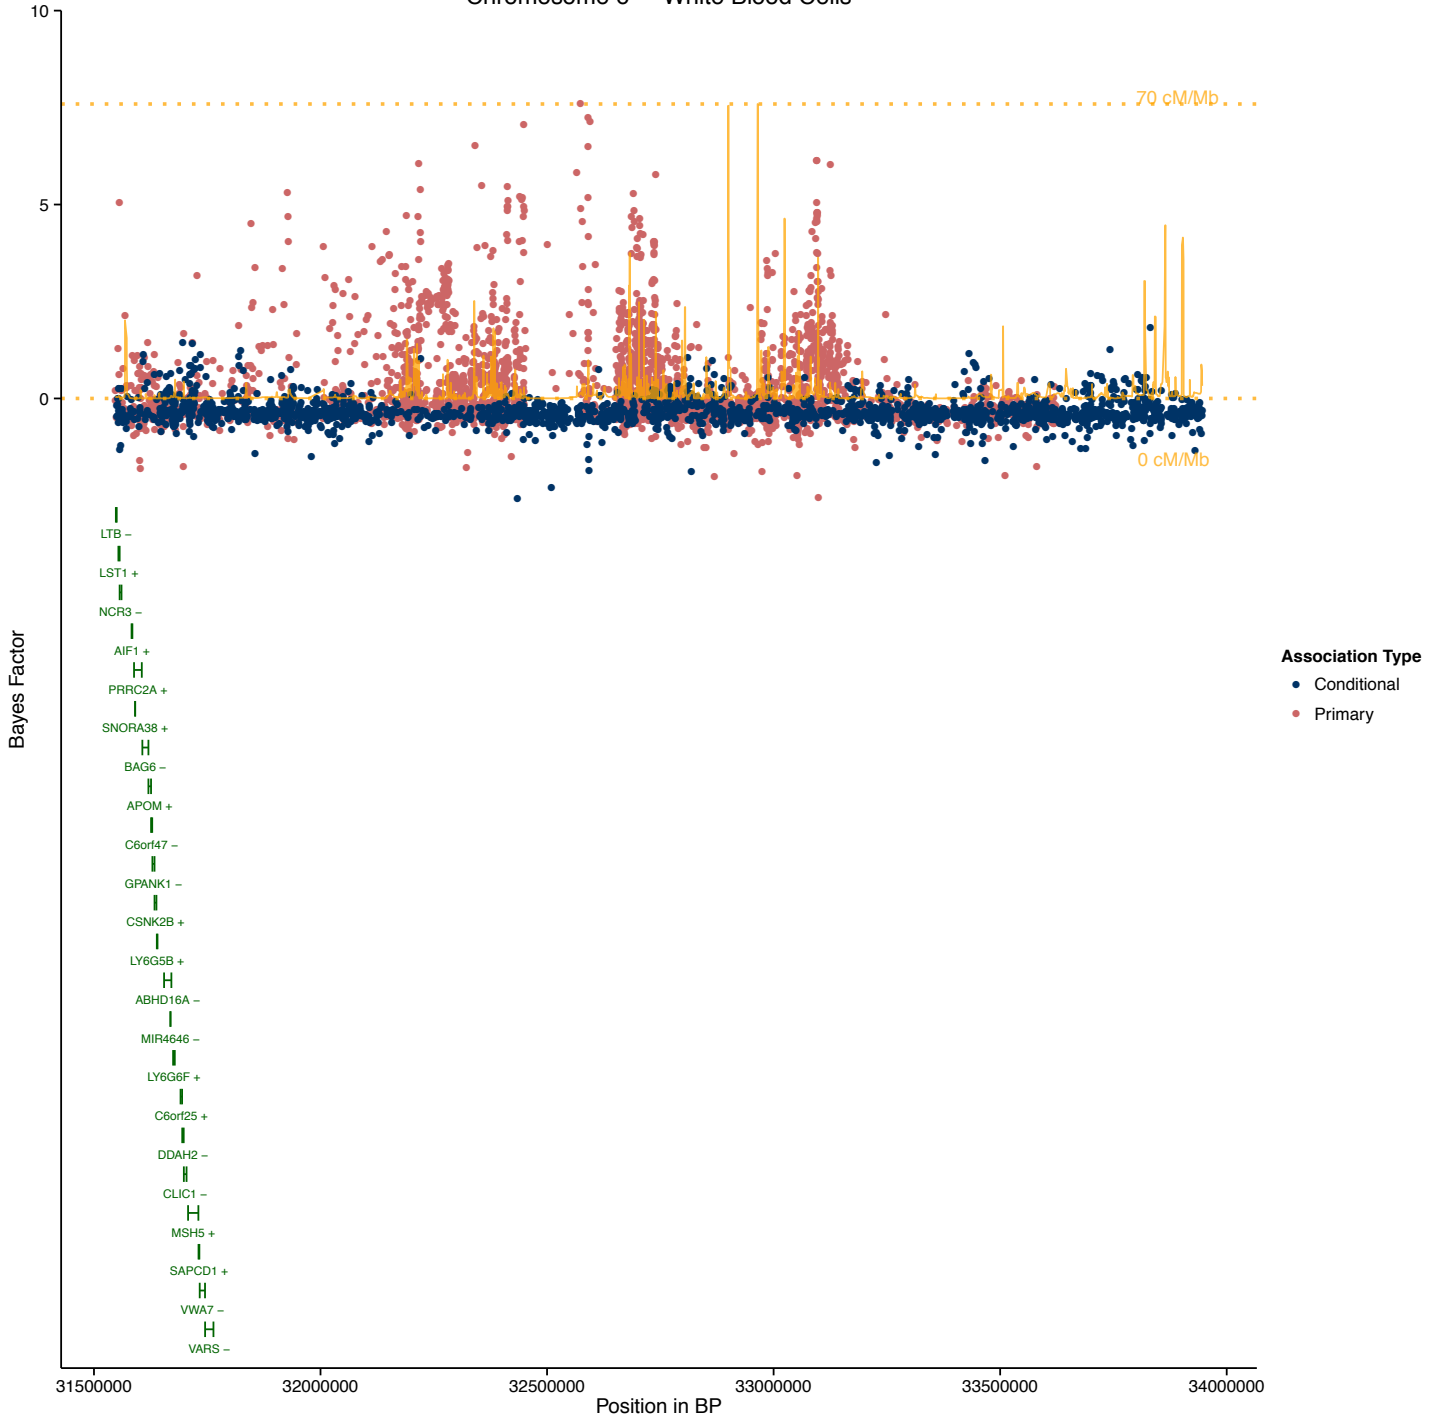

### Chromosome 4 – White Blood Cells

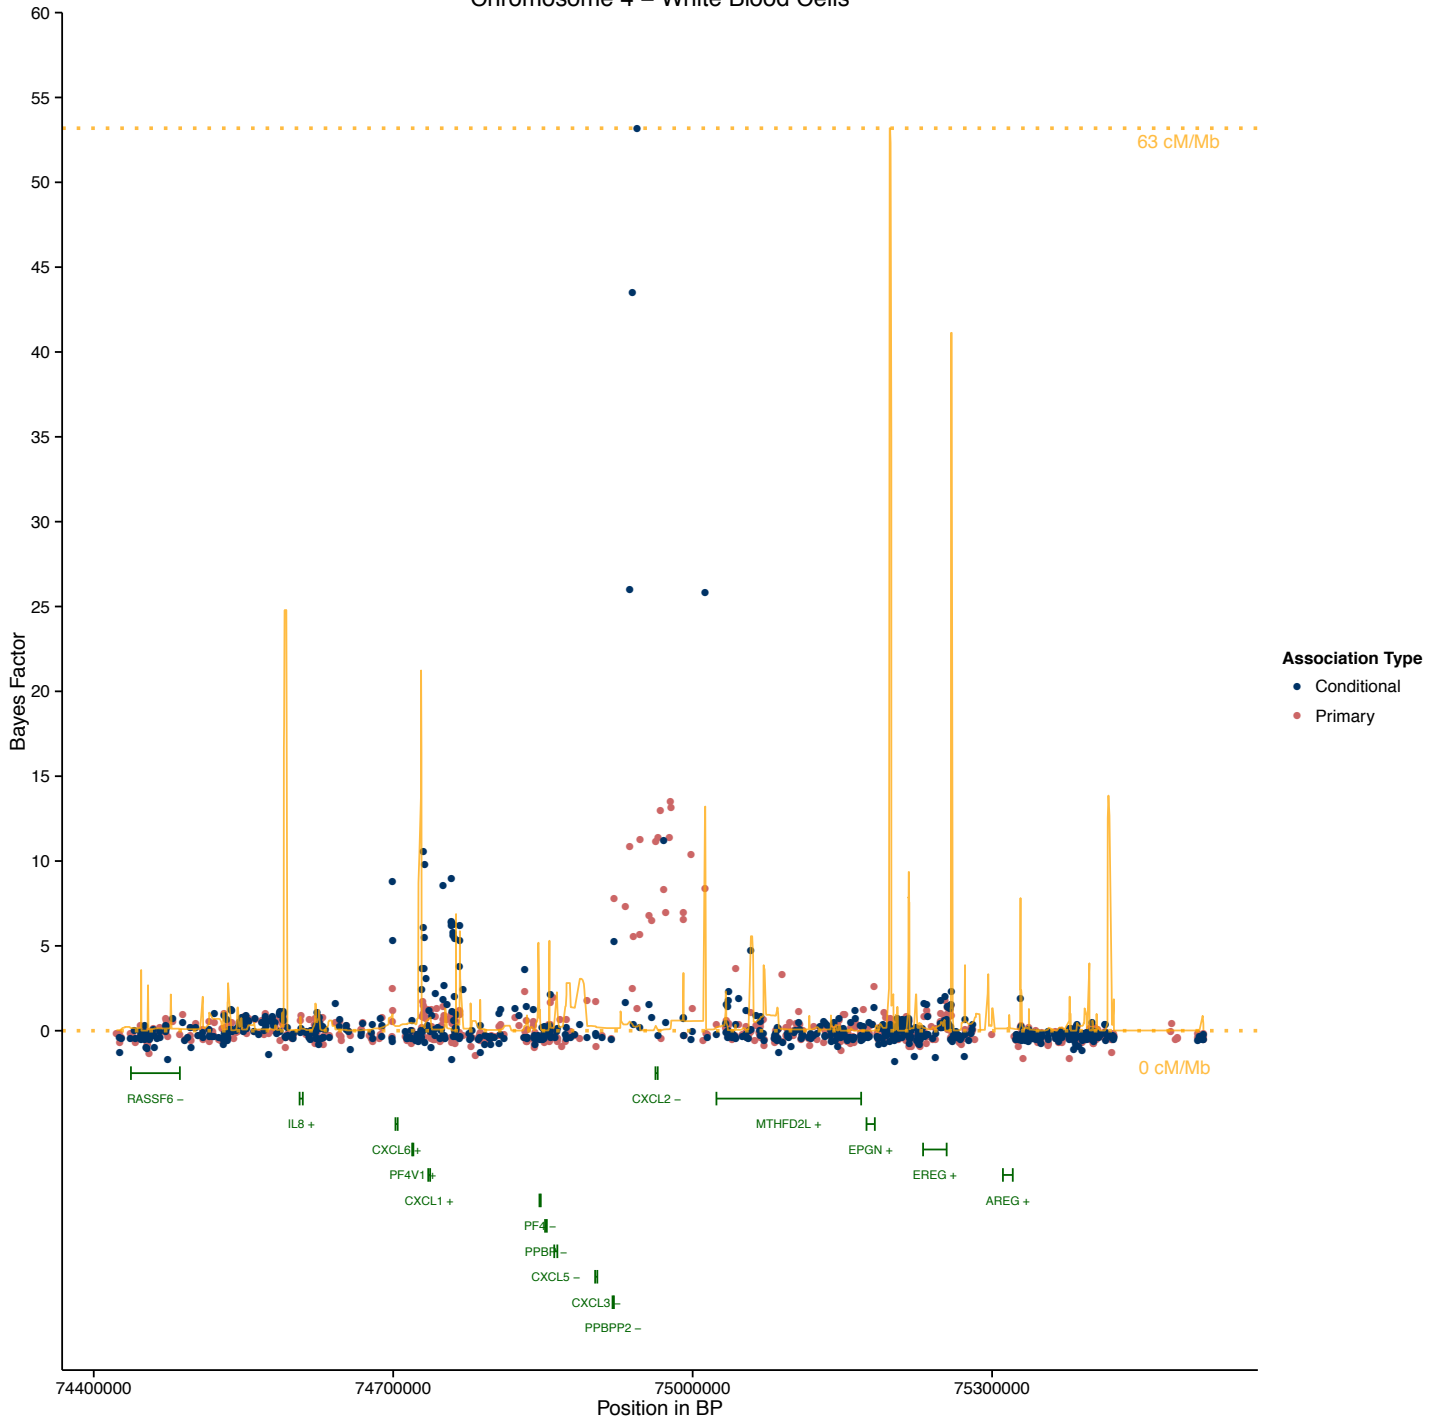

# Chromosome 17 – Neutrophils

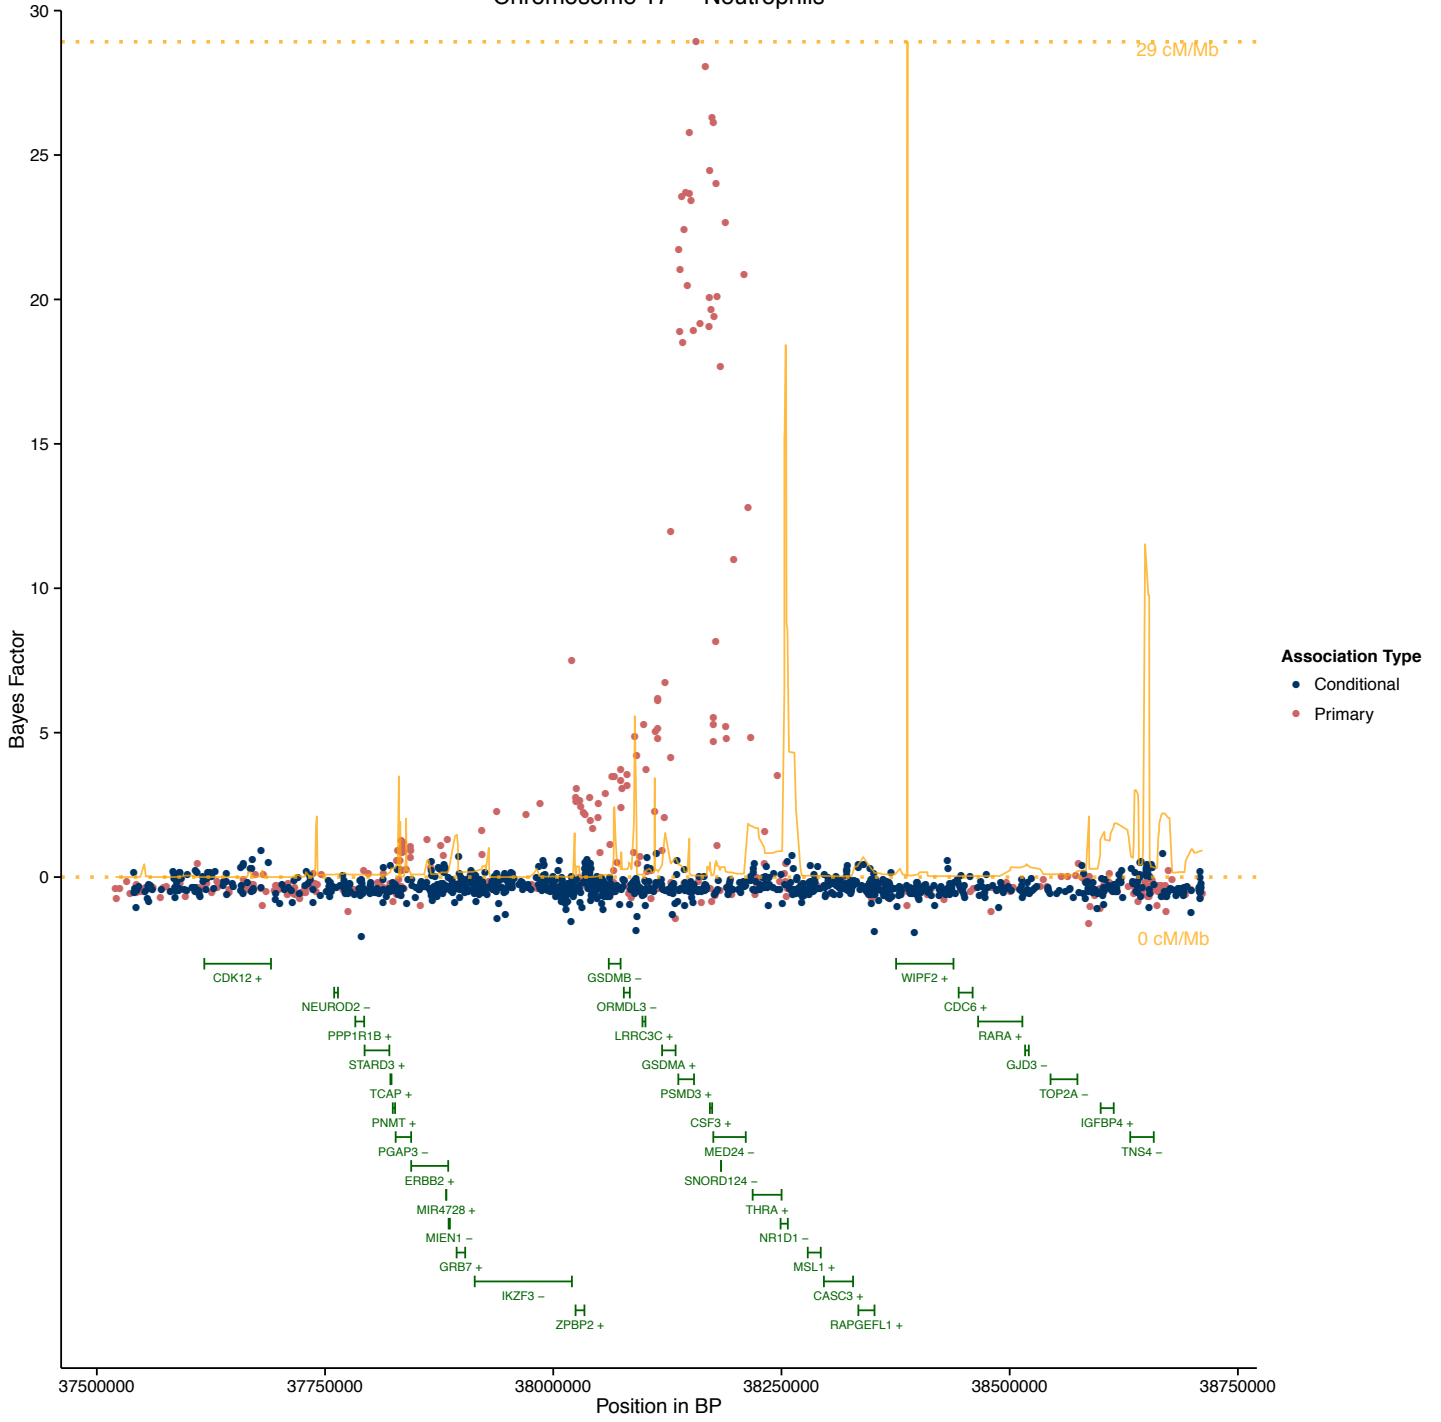

### Chromosome 4 – Neutrophil Cells

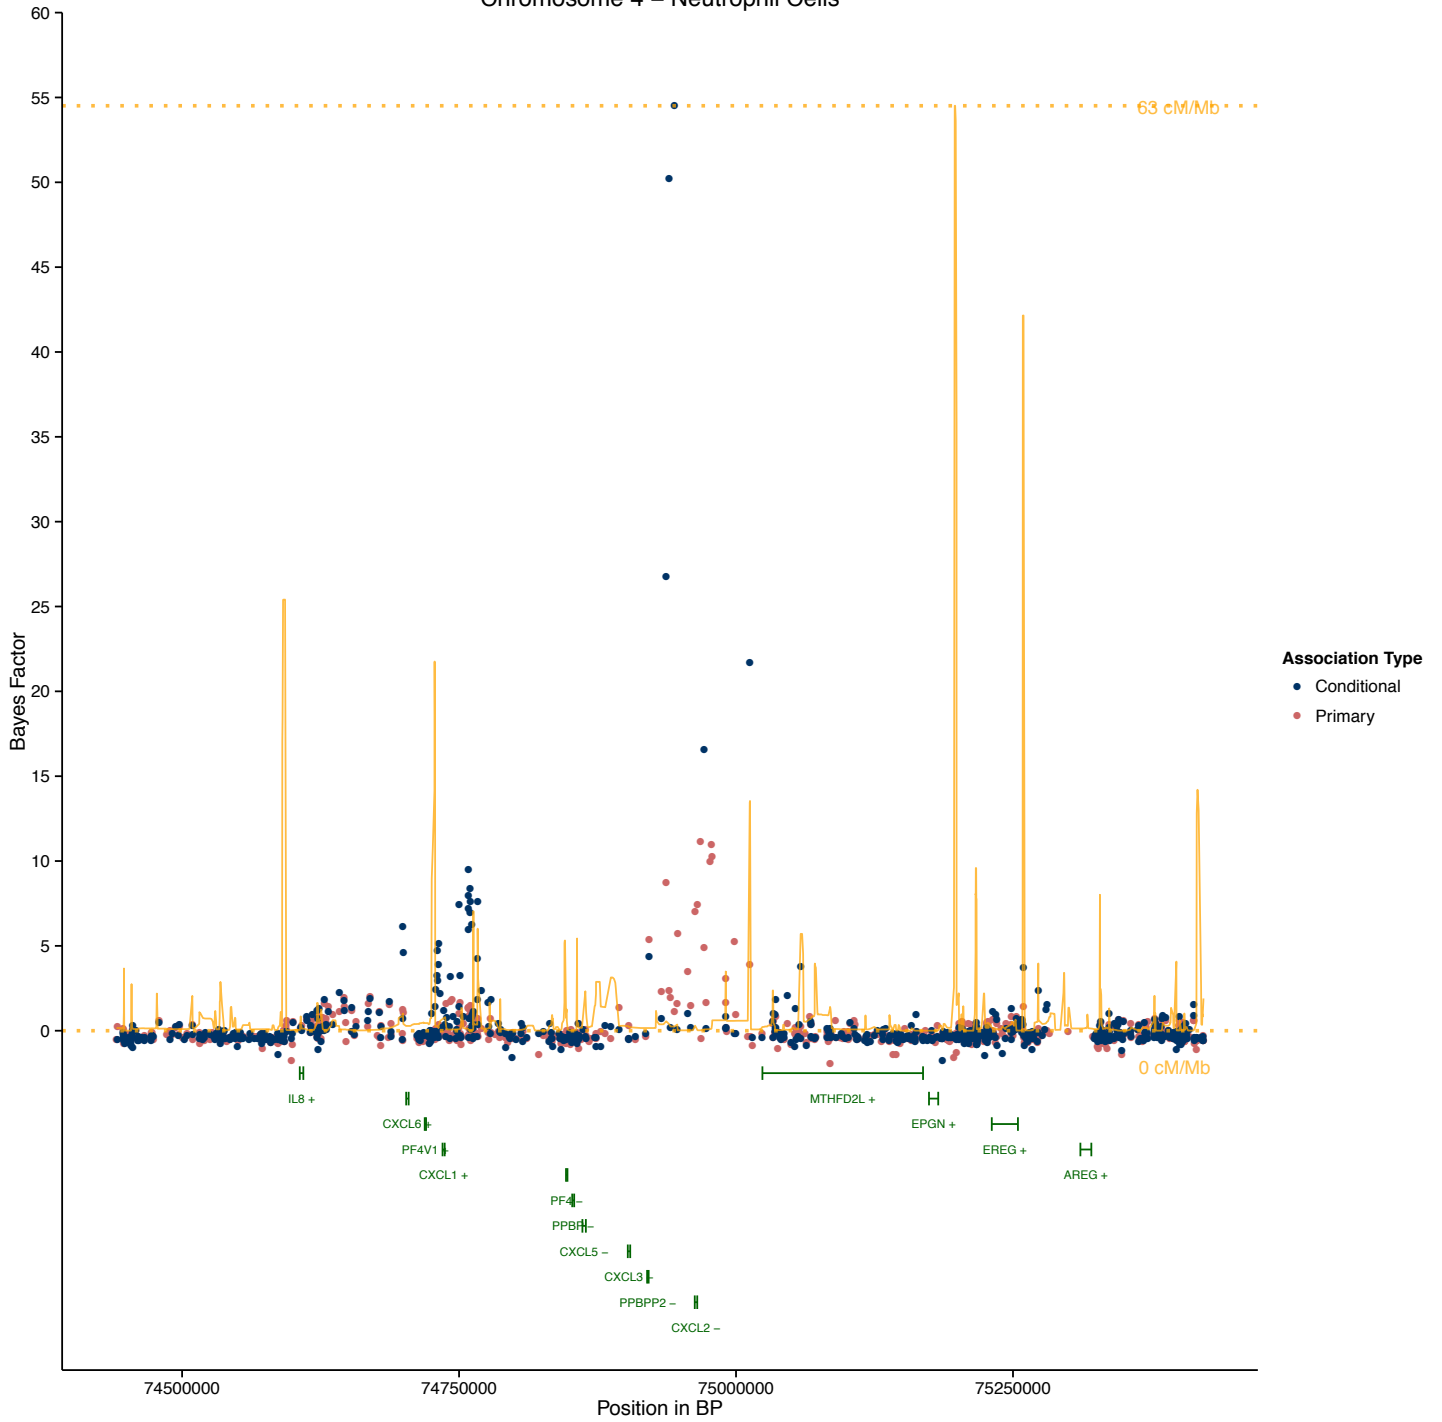



# Chromosome 7 – Neutrophils

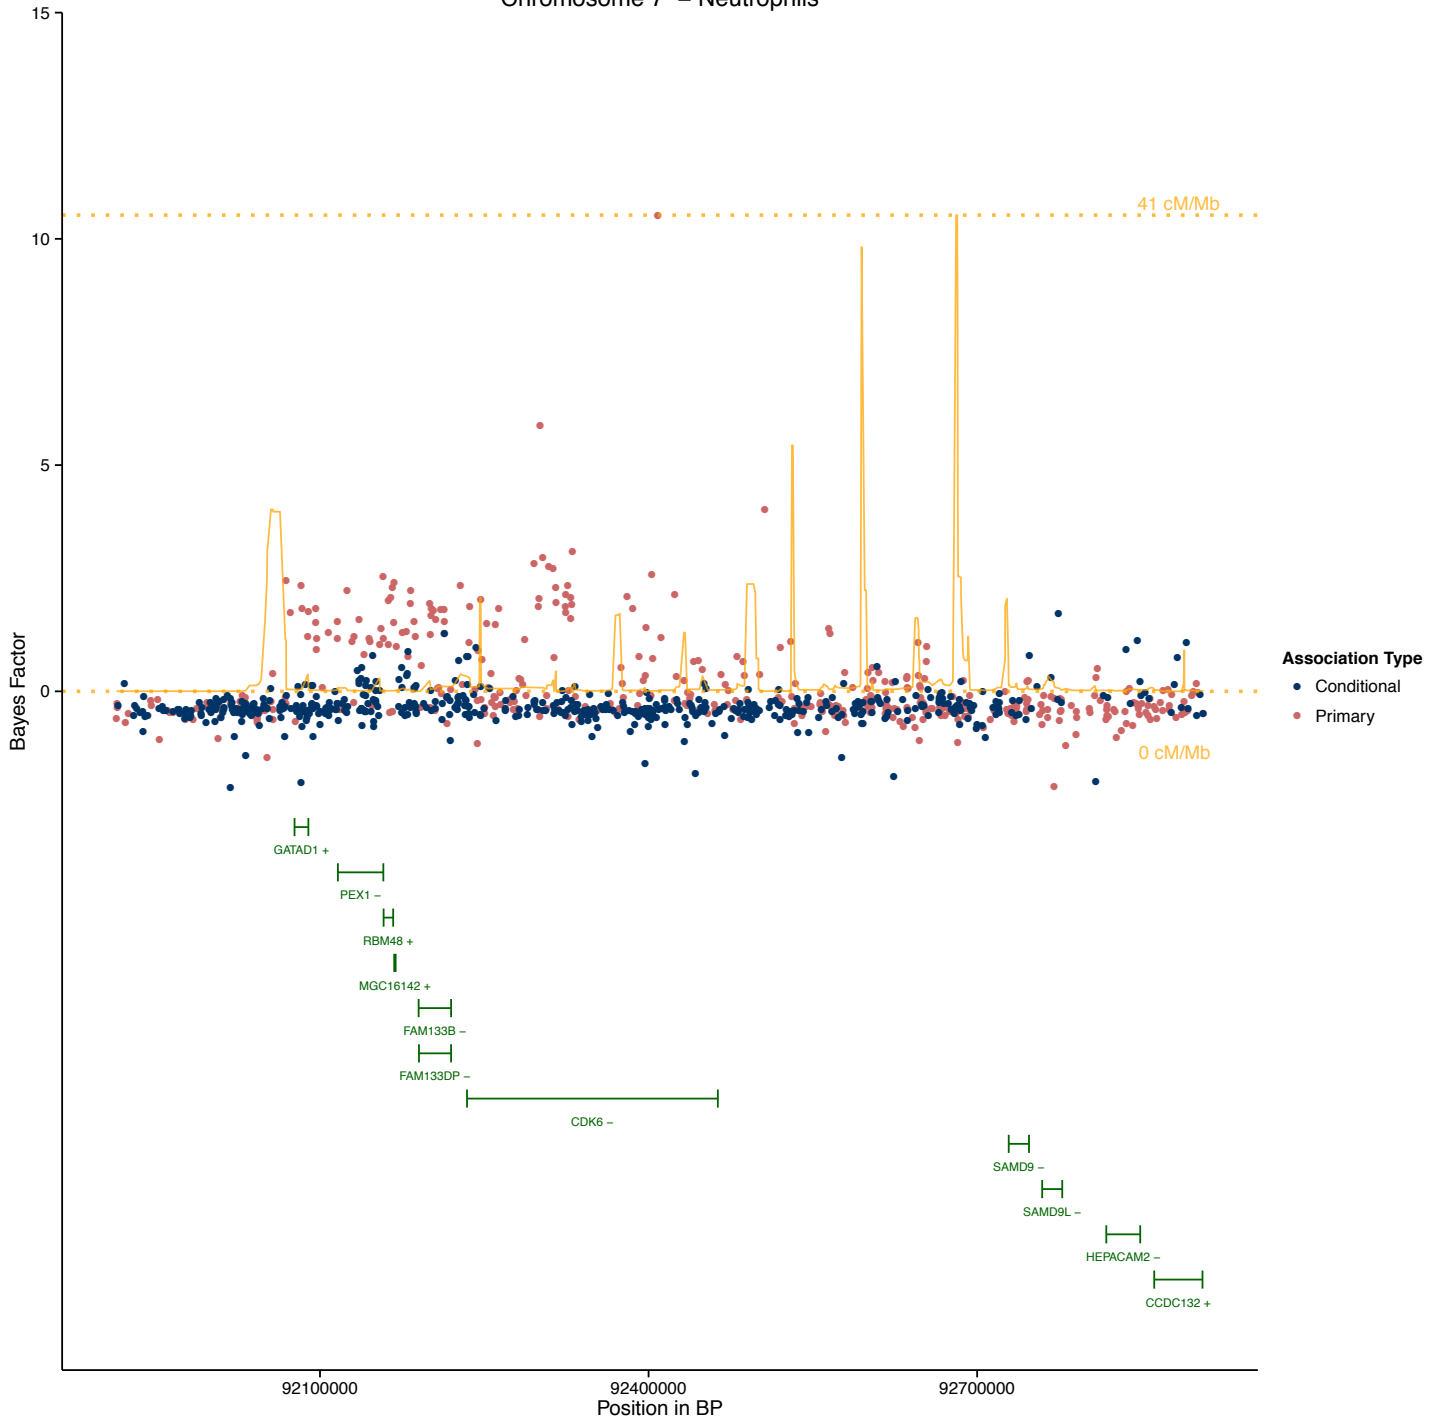

# Chromosome 9 – Monocytes

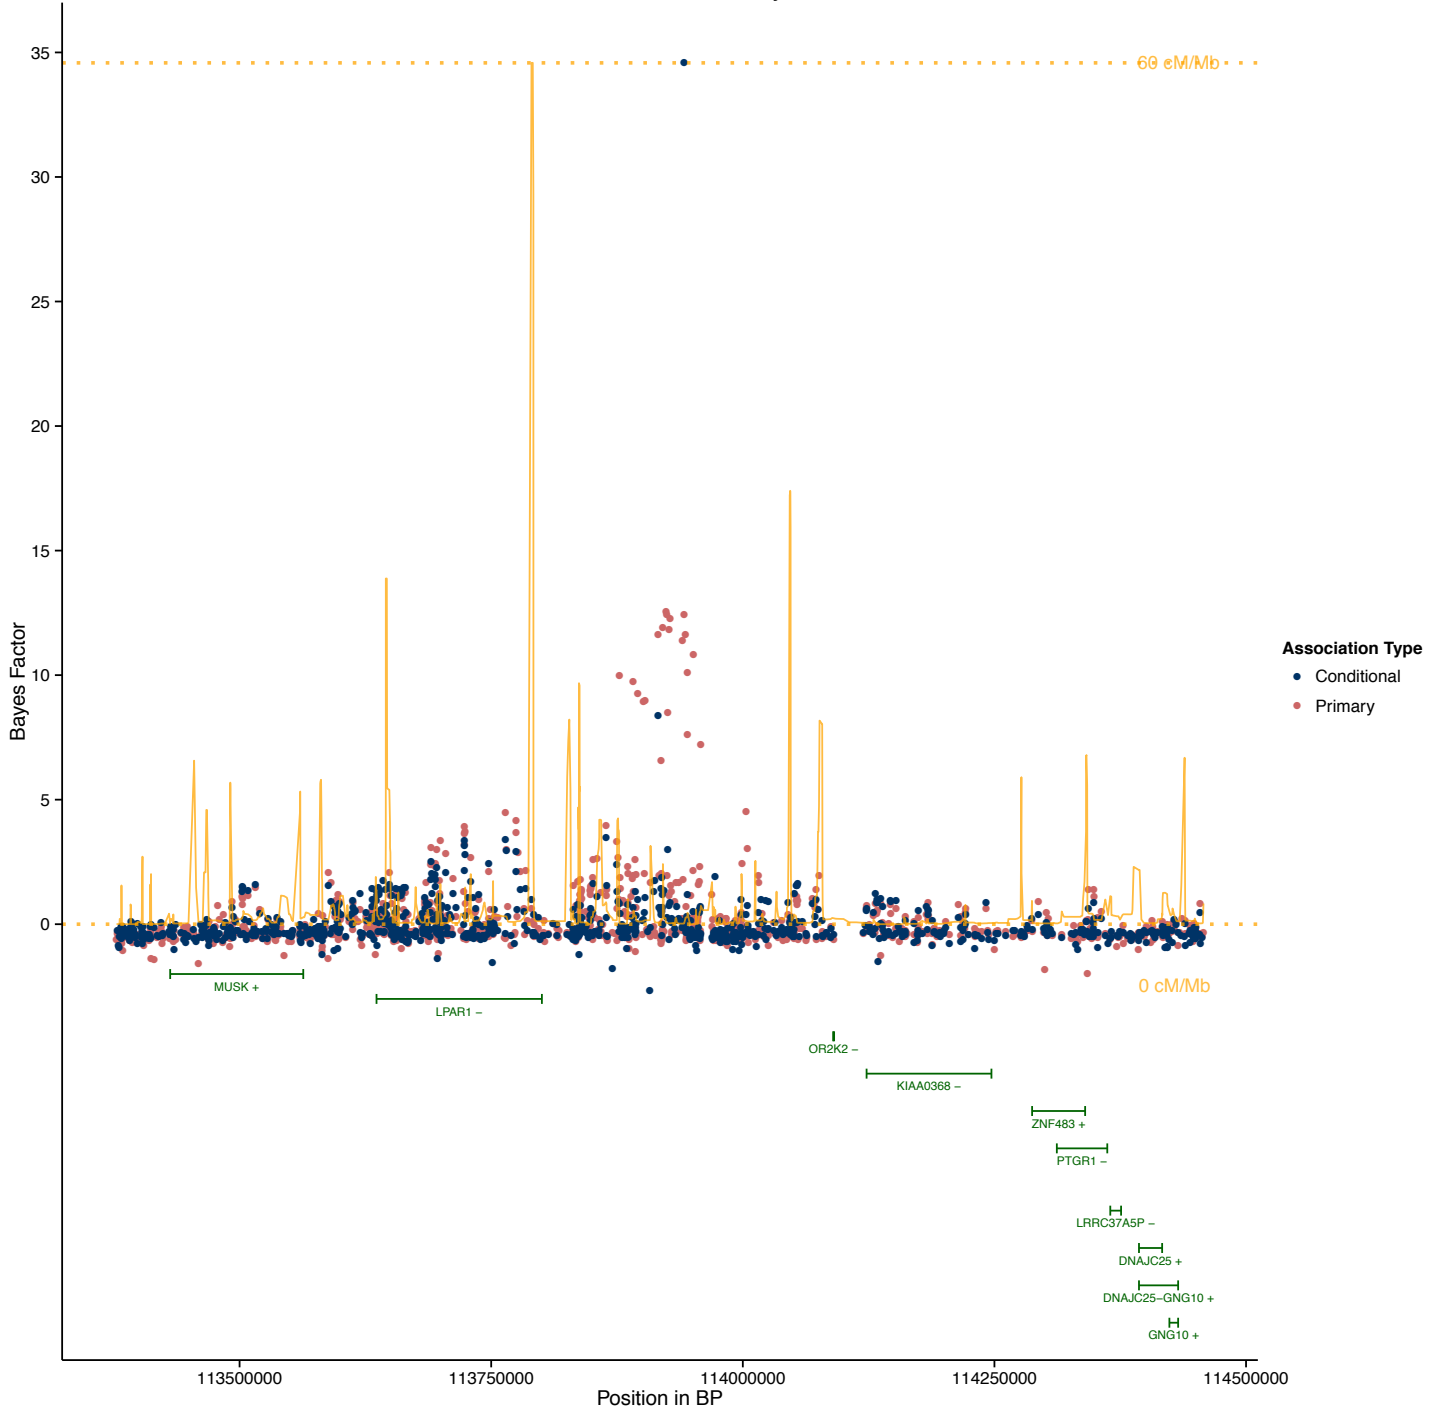

Chromosome 8 – Monocytes

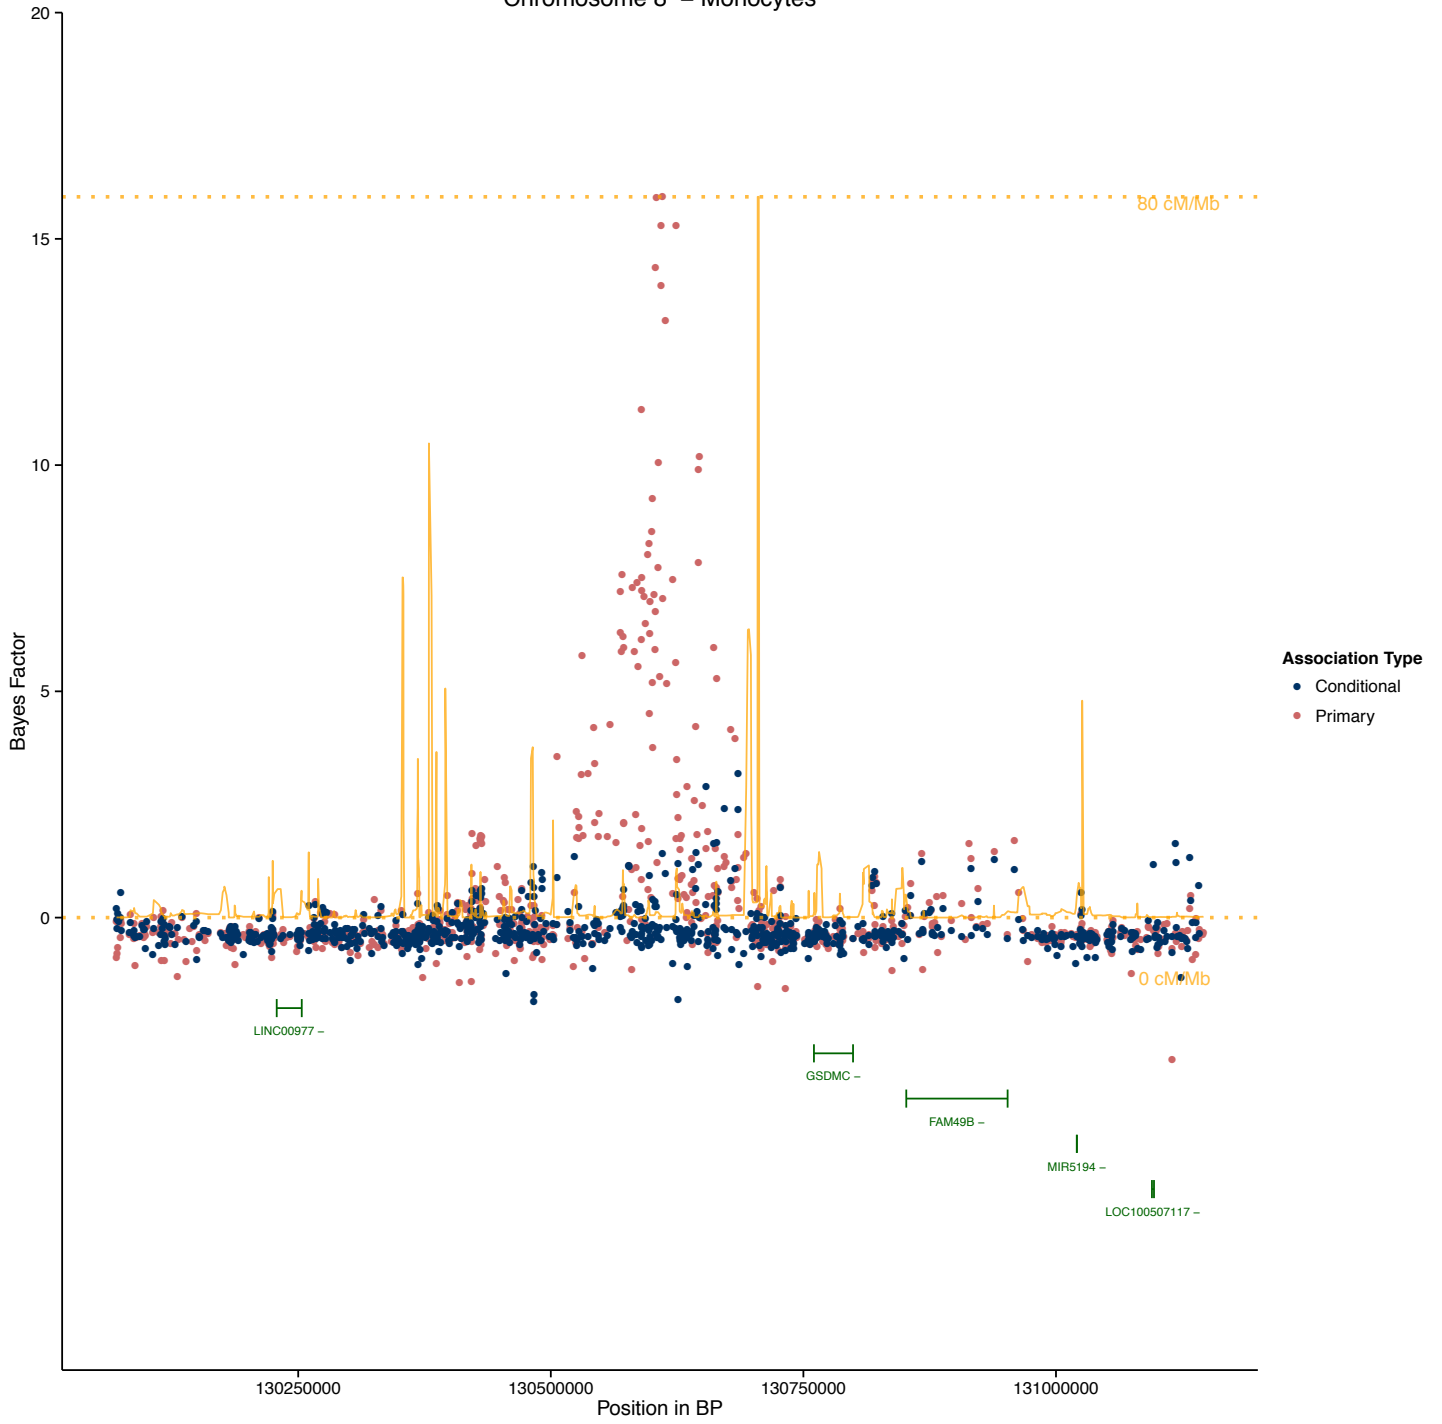

# Chromosome 3 – Monocytes

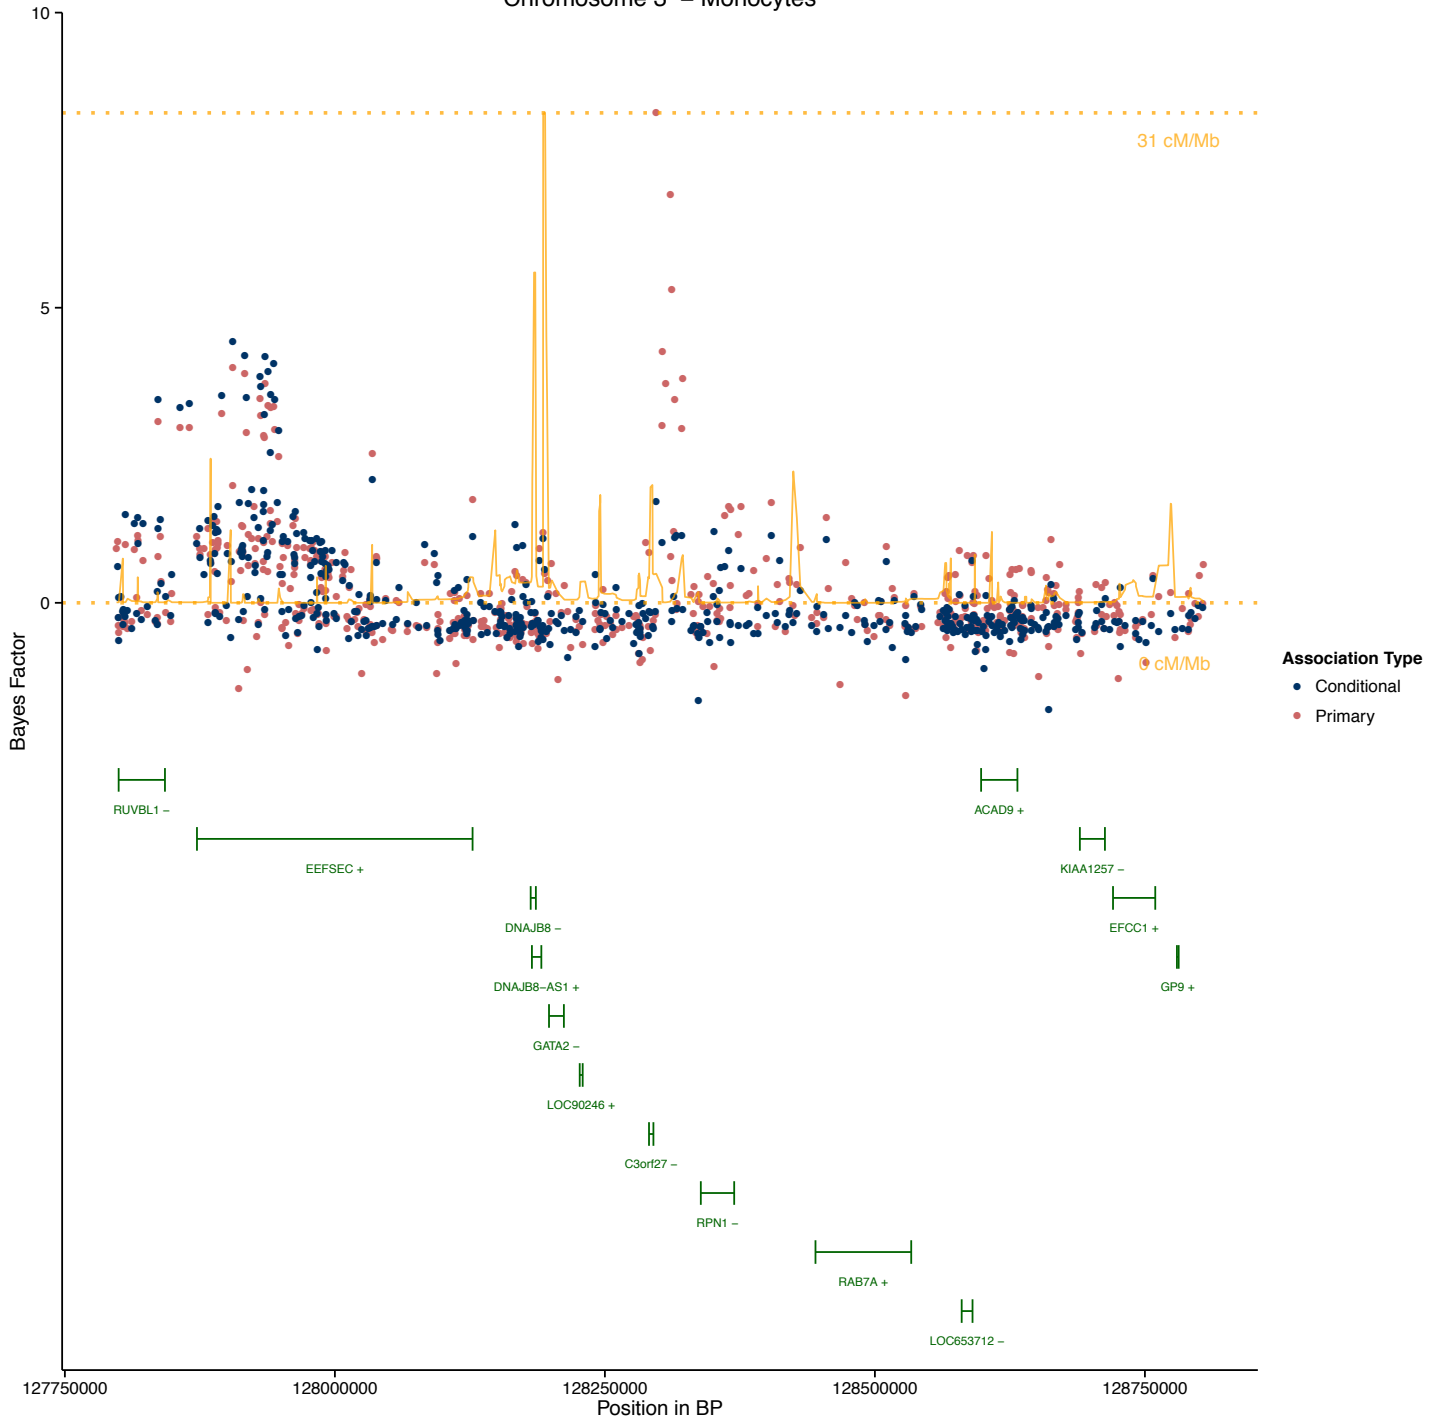

### Chromosome 2 – Monocytes

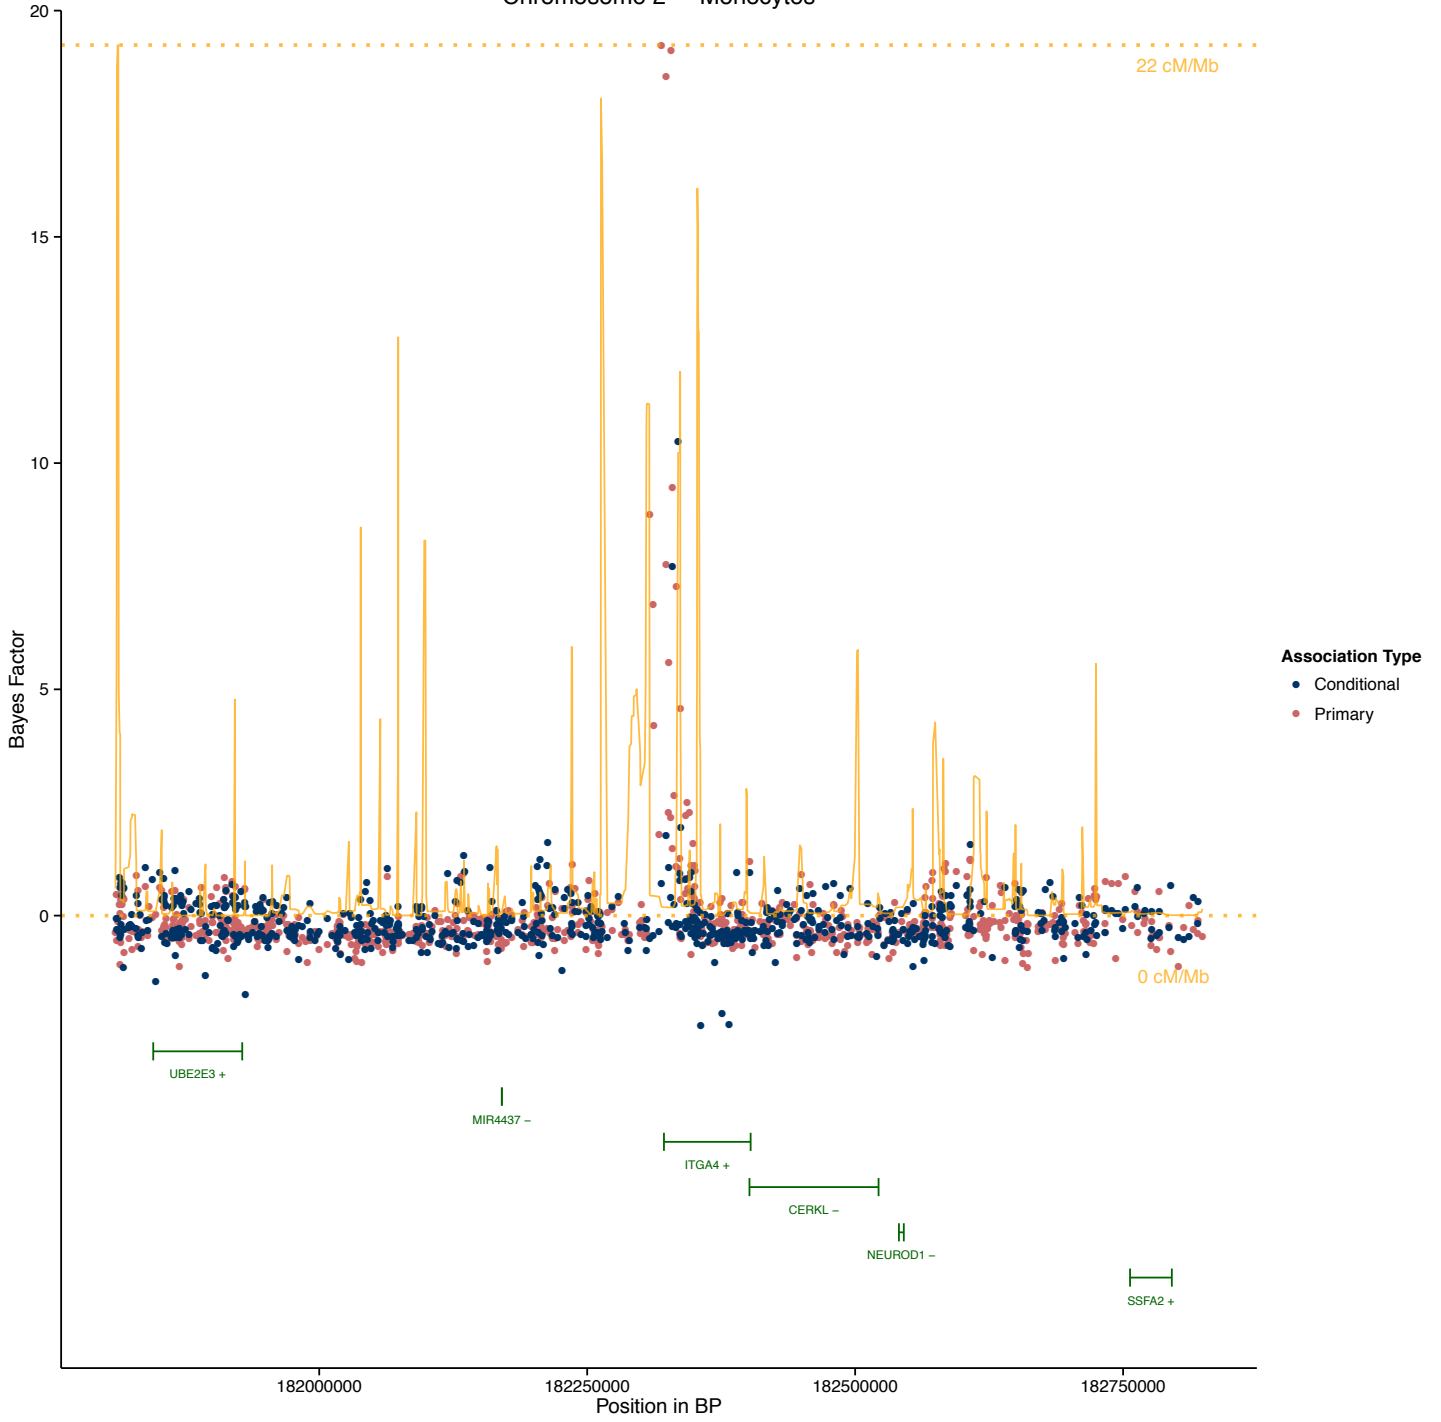

Table S1. Random-effects meta-analysis of MANTRA identified loci.

| Phenotype        | SNP               | Chr      | Position         | A1       | A2       | Summary Frequency | Effect        | Standard Error | P-value         | Direction   | Heterogeneity P-value |
|------------------|-------------------|----------|------------------|----------|----------|-------------------|---------------|----------------|-----------------|-------------|-----------------------|
| Monocytes        | rs10209150        | 2        | 182329619        | a        | g        | 0.8526            | -0.0065       | 0.006          | 2.83E-01        | ?+-         | 1.71E-01              |
| Monocytes        | rs10930969        | 2        | 182327957        | a        | g        | 0.1562            | -0.0126       | 0.0038         | 8.25E-04        | --+         | 2.27E-02              |
| Monocytes        | rs13415157        | 2        | 182330844        | a        | c        | 0.9791            | 0.0111        | 0.0119         | 3.51E-01        | ??+         | 1.00E+00              |
| Monocytes        | rs1375493         | 2        | 182323766        | a        | g        | 0.5217            | 0.0192        | 0.0024         | 1.86E-15        | +++         | 4.23E-06              |
| Monocytes        | rs1449260         | 2        | 182333447        | a        | g        | 0.3123            | -0.0153       | 0.0026         | 4.01E-09        | ---         | 1.65E-02              |
| <b>Monocytes</b> | <b>rs1449263</b>  | <b>2</b> | <b>182319301</b> | <b>t</b> | <b>c</b> | <b>0.4227</b>     | <b>0.0087</b> | <b>0.0024</b>  | <b>3.09E-04</b> | <b>++-</b>  | <b>1.28E-17</b>       |
| Monocytes        | rs155138          | 2        | 182319878        | a        | c        | 0.9485            | 0.0082        | 0.0071         | 2.45E-01        | ??+         | 1.00E+00              |
| Monocytes        | rs155141          | 2        | 182317202        | a        | t        | 0.1367            | -0.0107       | 0.0034         | 1.68E-03        | ---         | 1.99E-02              |
| Monocytes        | rs155146          | 2        | 182332350        | t        | c        | 0.0589            | -0.0086       | 0.0066         | 1.93E-01        | ?+-         | 2.77E-01              |
| Monocytes        | rs155147          | 2        | 182332146        | a        | g        | 0.0981            | 8.00E-04      | 0.0049         | 8.64E-01        | ?-+         | 2.26E-01              |
| Monocytes        | rs155148          | 2        | 182331265        | a        | g        | 0.7178            | 0.0144        | 0.0038         | 1.44E-04        | +++         | 5.26E-02              |
| Monocytes        | rs155149          | 2        | 182329647        | t        | g        | 0.6017            | -0.002        | 0.0028         | 4.70E-01        | --+         | 3.25E-11              |
| Monocytes        | rs2124440         | 2        | 182328214        | a        | g        | 0.5145            | 0.0188        | 0.0024         | 2.37E-15        | +++         | 6.86E-07              |
| Monocytes        | rs3731835         | 2        | 182321179        | t        | c        | 0.9794            | 0.0113        | 0.0118         | 3.38E-01        | ??+         | 1.00E+00              |
| Monocytes        | rs3770132         | 2        | 182332961        | a        | g        | 0.7067            | 0.0139        | 0.0052         | 8.13E-03        | +++         | 1.53E-01              |
| Monocytes        | rs3770136         | 2        | 182329460        | t        | c        | 0.5251            | -0.012        | 0.0042         | 4.08E-03        | ---         | 7.20E-02              |
| Monocytes        | rs3770137         | 2        | 182326136        | c        | g        | 0.719             | 0.0197        | 0.0038         | 1.77E-07        | +++         | 9.79E-01              |
| Monocytes        | rs3770138         | 2        | 182325907        | t        | c        | 0.4876            | -0.0129       | 0.0038         | 6.40E-04        | --+         | 2.96E-02              |
| Monocytes        | rs10188326        | 2        | 182311519        | t        | g        | 0.9237            | -0.0079       | 0.0057         | 1.69E-01        | ??-         | 1.00E+00              |
| Monocytes        | rs10930969        | 2        | 182327957        | a        | g        | 0.1562            | -0.0126       | 0.0038         | 8.25E-04        | --+         | 2.27E-02              |
| <b>Monocytes</b> | <b>rs12988934</b> | <b>2</b> | <b>182323665</b> | <b>t</b> | <b>c</b> | <b>0.2469</b>     | <b>0.0382</b> | <b>0.0063</b>  | <b>1.32E-09</b> | <b>+++?</b> | <b>5.90E-01</b>       |
| Monocytes        | rs13384671        | 2        | 182311594        | a        | g        | 0.6097            | 0.0123        | 0.0027         | 6.36E-06        | +++         | 1.83E-05              |
| Monocytes        | rs1375493         | 2        | 182323766        | a        | g        | 0.5217            | 0.0192        | 0.0024         | 1.86E-15        | +++         | 4.23E-06              |
| Monocytes        | rs1449263         | 2        | 182319301        | t        | c        | 0.4227            | 0.0087        | 0.0024         | 3.09E-04        | ++-         | 1.28E-17              |
| Monocytes        | rs155123          | 2        | 182312272        | a        | c        | 0.6856            | 0.0166        | 0.0036         | 3.61E-06        | ??+         | 6.03E-03              |
| Monocytes        | rs155138          | 2        | 182319878        | a        | c        | 0.9485            | 0.0082        | 0.0071         | 2.45E-01        | ??+         | 1.00E+00              |
| Monocytes        | rs155141          | 2        | 182317202        | a        | t        | 0.1367            | -0.0107       | 0.0034         | 1.68E-03        | ---         | 1.99E-02              |
| Monocytes        | rs2124440         | 2        | 182328214        | a        | g        | 0.5145            | 0.0188        | 0.0024         | 2.37E-15        | +++         | 6.86E-07              |
| Monocytes        | rs3731835         | 2        | 182321179        | t        | c        | 0.9794            | 0.0113        | 0.0118         | 3.38E-01        | ??+         | 1.00E+00              |
| Monocytes        | rs3770137         | 2        | 182326136        | c        | g        | 0.719             | 0.0197        | 0.0038         | 1.77E-07        | +++         | 9.79E-01              |
| Monocytes        | rs3770138         | 2        | 182325907        | t        | c        | 0.4876            | -0.0129       | 0.0038         | 6.40E-04        | --+         | 2.96E-02              |
| Monocytes        | rs2010527         | 3        | 128303083        | c        | g        | 0.5977            | 0.0103        | 0.0029         | 3.95E-04        | +++         | 4.53E-04              |
| Monocytes        | rs2465354         | 3        | 128294897        | t        | c        | 0.6569            | -0.003        | 0.0034         | 3.65E-01        | +?-         | 5.07E-01              |
| Monocytes        | rs2712421         | 3        | 128287743        | t        | g        | 0.3218            | 0.0038        | 0.003          | 2.11E-01        | ++-         | 1.67E-04              |
| Monocytes        | rs2712423         | 3        | 128290938        | t        | g        | 0.6312            | 0.0079        | 0.003          | 9.02E-03        | +++         | 2.72E-01              |
| Monocytes        | rs2713575         | 3        | 128294355        | a        | g        | 0.4891            | -8.00E-04     | 0.0027         | 7.81E-01        | -?-         | 7.33E-01              |

Table S1. Random-effects meta-analysis of MANTRA identified loci.

|                  |                  |          |                  |          |          |               |                |               |                 |            |                 |
|------------------|------------------|----------|------------------|----------|----------|---------------|----------------|---------------|-----------------|------------|-----------------|
| Monocytes        | rs2713589        | 3        | 128290208        | t        | c        | 0.5501        | 7.00E-04       | 0.0027        | 7.93E-01        | ---        | 8.55E-01        |
| Monocytes        | rs2734046        | 3        | 128292213        | a        | g        | 0.1691        | 0.0016         | 0.0042        | 7.11E-01        | ---        | 7.76E-01        |
| Monocytes        | rs6772849        | 3        | 128306418        | t        | c        | 0.3745        | -0.0093        | 0.0026        | 3.86E-04        | ---        | 1.71E-04        |
| Monocytes        | rs6798431        | 3        | 128303373        | t        | c        | 0.5665        | 0.0102         | 0.0025        | 4.00E-05        | +++        | 4.32E-05        |
| Monocytes        | rs7611156        | 3        | 128296868        | t        | c        | 0.7322        | -0.0049        | 0.0039        | 2.12E-01        | -+-        | 2.98E-01        |
| <b>Monocytes</b> | <b>rs9880192</b> | <b>3</b> | <b>128297569</b> | <b>c</b> | <b>g</b> | <b>0.2892</b> | <b>-0.0134</b> | <b>0.0033</b> | <b>5.27E-05</b> | <b>---</b> | <b>2.28E-06</b> |
| Monocytes        | rs166175         | 5        | 76062954         | a        | g        | 0.671         | 0.0032         | 0.0034        | 0.3449          | +++        | 0.7236          |
| Monocytes        | rs193943         | 5        | 76049832         | t        | c        | 0.4632        | 0.0017         | 0.0027        | 0.531           | +++        | 0.7421          |
| <b>Monocytes</b> | <b>rs2047076</b> | <b>5</b> | <b>76058509</b>  | <b>t</b> | <b>c</b> | <b>0.4863</b> | <b>-0.0046</b> | <b>0.005</b>  | <b>0.3544</b>   | <b>---</b> | <b>2.41E-07</b> |
| Monocytes        | rs2054192        | 5        | 76048623         | a        | g        | 0.6932        | 3.00E-04       | 0.0038        | 0.9271          | ---        | 0.1092          |
| Monocytes        | rs250718         | 5        | 76050452         | c        | g        | 0.6716        | 0.0033         | 0.0034        | 0.3259          | ++-        | 0.08492         |
| Monocytes        | rs250719         | 5        | 76050491         | a        | g        | 0.5465        | 0.0032         | 0.0025        | 0.197           | +++        | 0.9672          |
| Monocytes        | rs250720         | 5        | 76051465         | a        | t        | 0.5113        | 0.0019         | 0.0025        | 0.4546          | +++        | 0.9669          |
| Monocytes        | rs250723         | 5        | 76056054         | t        | c        | 0.6509        | 0.0031         | 0.003         | 0.2977          | ++-        | 0.6892          |
| Monocytes        | rs250724         | 5        | 76061256         | a        | c        | 0.4776        | -0.002         | 0.0025        | 0.4279          | ++-        | 0.8452          |
| Monocytes        | rs250726         | 5        | 76059981         | a        | g        | 0.3473        | -0.0043        | 0.0028        | 0.1163          | ++-        | 0.5026          |
| Monocytes        | rs250727         | 5        | 76059301         | t        | c        | 0.4739        | -4.00E-04      | 0.0024        | 0.8828          | -+-        | 0.7668          |
| Monocytes        | rs250728         | 5        | 76059094         | t        | g        | 0.5791        | -0.0023        | 0.003         | 0.4411          | ---        | 0.544           |
| Monocytes        | rs250729         | 5        | 76059055         | a        | g        | 0.4825        | -0.0013        | 0.0024        | 0.5883          | ---        | 0.9574          |
| Monocytes        | rs250759         | 5        | 76067728         | a        | g        | 0.422         | -0.0035        | 0.0024        | 0.1447          | ++-        | 0.7495          |
| Monocytes        | rs250760         | 5        | 76067624         | t        | g        | 0.6115        | -0.0025        | 0.0033        | 0.445           | ---        | 0.615           |
| Monocytes        | rs250761         | 5        | 76067376         | t        | c        | 0.5567        | -0.0051        | 0.0026        | 0.05333         | ---        | 0.9884          |
| Monocytes        | rs515362         | 5        | 76061924         | t        | c        | 0.5102        | 9.00E-04       | 0.0024        | 0.6994          | ++-        | 0.6515          |
| Monocytes        | rs6889169        | 5        | 76063338         | t        | g        | 0.9226        | -0.0059        | 0.0059        | 0.3212          | ??-        | 1               |
| Monocytes        | rs1639114        | 6        | 31219224         | a        | c        | 0.0361        | 0.0066         | 0.0072        | 3.63E-01        | ??+        | 2.58E-01        |
| Monocytes        | rs1793891        | 6        | 31221698         | t        | c        | 0.8454        | 0.0062         | 0.0044        | 1.58E-01        | -?+        | 6.40E-01        |
| Monocytes        | rs1986997        | 6        | 31228410         | t        | c        | 0.6391        | -4.00E-04      | 0.0032        | 8.93E-01        | ++-        | 3.81E-06        |
| Monocytes        | rs2245822        | 6        | 31230800         | a        | g        | 0.1749        | -0.0116        | 0.0035        | 8.18E-04        | ---        | 1.67E-01        |
| Monocytes        | rs2394950        | 6        | 31230701         | a        | g        | 0.0809        | 0.0035         | 0.005         | 4.81E-01        | ??-        | 5.41E-02        |
| Monocytes        | rs2394951        | 6        | 31230759         | a        | g        | 0.1812        | 0.0099         | 0.0031        | 1.46E-03        | +++        | 4.06E-03        |
| Monocytes        | rs2394952        | 6        | 31230882         | a        | g        | 0.6833        | -0.0092        | 0.0031        | 3.56E-03        | ---        | 5.25E-03        |
| Monocytes        | rs2524117        | 6        | 31230869         | t        | c        | 0.3878        | 9.00E-04       | 0.0027        | 7.33E-01        | -+-        | 1.93E-03        |
| Monocytes        | rs2524118        | 6        | 31230667         | a        | t        | 0.0849        | 0.0045         | 0.0054        | 4.09E-01        | -?+        | 8.68E-01        |
| Monocytes        | rs2524121        | 6        | 31228972         | a        | g        | 0.11          | 0.0156         | 0.0038        | 3.49E-05        | +++        | 7.74E-04        |
| Monocytes        | rs2844626        | 6        | 31229552         | a        | t        | 0.57          | 0.007          | 0.0025        | 5.26E-03        | ++-        | 6.72E-02        |
| Monocytes        | rs2844627        | 6        | 31229462         | t        | c        | 0.6571        | -0.0035        | 0.0034        | 2.99E-01        | ---        | 1.17E-03        |
| Monocytes        | rs2894189        | 6        | 31217815         | a        | c        | 0.4675        | 0.0066         | 0.0024        | 5.14E-03        | +++        | 3.10E-02        |
| Monocytes        | rs2894196        | 6        | 31230111         | a        | t        | 0.0756        | -0.0062        | 0.0053        | 2.44E-01        | ---        | 8.14E-01        |

Table S1. Random-effects meta-analysis of MANTRA identified loci.

|                  |                  |          |                 |          |          |               |               |               |                 |            |                 |
|------------------|------------------|----------|-----------------|----------|----------|---------------|---------------|---------------|-----------------|------------|-----------------|
| Monocytes        | rs3095241        | 6        | 31215635        | a        | c        | 0.3707        | 0.008         | 0.0027        | 2.47E-03        | +++        | 3.12E-02        |
| <b>Monocytes</b> | <b>rs3095254</b> | <b>6</b> | <b>31221668</b> | <b>c</b> | <b>g</b> | <b>0.5019</b> | <b>0.0091</b> | <b>0.0024</b> | <b>1.89E-04</b> | <b>+++</b> | <b>2.42E-05</b> |
| Monocytes        | rs3130408        | 6        | 31213791        | a        | g        | 0.7627        | -0.0073       | 0.0043        | 9.33E-02        | +--        | 2.62E-02        |
| Monocytes        | rs3130409        | 6        | 31213811        | a        | g        | 0.366         | -0.0089       | 0.0028        | 1.66E-03        | -?-        | 2.45E-03        |
| Monocytes        | rs3130433        | 6        | 31219638        | a        | g        | 0.1028        | 0.0075        | 0.0044        | 9.26E-02        | --+        | 2.64E-02        |
| Monocytes        | rs3130441        | 6        | 31228565        | a        | g        | 0.1039        | 0.0156        | 0.0039        | 5.48E-05        | +++        | 1.88E-04        |
| Monocytes        | rs3130444        | 6        | 31228634        | t        | c        | 0.2079        | -0.0044       | 0.0041        | 2.85E-01        | +?-        | 5.22E-02        |
| Monocytes        | rs3899471        | 6        | 31215037        | t        | c        | 0.2635        | -0.001        | 0.0031        | 7.55E-01        | --+        | 6.02E-01        |
| Monocytes        | rs4084090        | 6        | 31218835        | a        | g        | 0.7796        | -0.0064       | 0.0043        | 1.34E-01        | +--        | 4.12E-02        |
| Monocytes        | rs4084262        | 6        | 31218889        | t        | c        | 0.6501        | -3.00E-04     | 0.0033        | 9.29E-01        | ?--        | 9.25E-01        |
| Monocytes        | rs4332019        | 6        | 31213413        | t        | g        | 0.2873        | -0.0013       | 0.0031        | 6.62E-01        | --+        | 5.58E-01        |
| Monocytes        | rs4416711        | 6        | 31221039        | t        | c        | 0.7447        | 0.003         | 0.0042        | 4.83E-01        | -?+        | 9.50E-03        |
| Monocytes        | rs7747738        | 6        | 31230924        | t        | c        | 0.8998        | -0.0026       | 0.0051        | 6.13E-01        | ??-        | 1.00E+00        |
| Monocytes        | rs9264180        | 6        | 31219902        | a        | c        | 0.5862        | -0.0061       | 0.0026        | 2.08E-02        | ---        | 1.62E-01        |
| Monocytes        | rs9264374        | 6        | 31228666        | t        | c        | 0.2297        | 0.0026        | 0.0031        | 3.87E-01        | ?+?        | 5.22E-01        |
| Monocytes        | rs9264386        | 6        | 31229130        | c        | g        | 0.6804        | -0.0104       | 0.003         | 6.01E-04        | ---        | 6.36E-03        |
| Monocytes        | rs9264391        | 6        | 31229203        | a        | g        | 0.0369        | 0.0116        | 0.0079        | 1.40E-01        | -?+        | 6.14E-01        |
| Monocytes        | rs9264409        | 6        | 31229738        | a        | g        | 0.1741        | 0.0097        | 0.0031        | 2.13E-03        | +++        | 9.08E-03        |
| Monocytes        | rs9264416        | 6        | 31230042        | a        | g        | 0.668         | -0.01         | 0.0039        | 1.06E-02        | -+?        | 1.53E-02        |
| Monocytes        | rs9368665        | 6        | 31229248        | a        | g        | 0.6998        | 0.0039        | 0.0052        | 4.45E-01        | +++        | 7.44E-01        |
| Monocytes        | rs9368666        | 6        | 31229644        | a        | g        | 0.7238        | 0.0045        | 0.0052        | 3.87E-01        | +++        | 6.19E-01        |
| Monocytes        | rs9468908        | 6        | 31216227        | a        | g        | 0.0685        | -0.0049       | 0.0057        | 3.90E-01        | ?+-        | 8.11E-01        |
| Monocytes        | rs9501364        | 6        | 31217026        | a        | g        | 0.0872        | 0.0095        | 0.0046        | 3.80E-02        | +++        | 1.08E-04        |
| Monocytes        | rs9501543        | 6        | 31216956        | t        | c        | 0.0474        | -0.0057       | 0.0069        | 4.07E-01        | +--        | 1.16E-02        |
| Monocytes        | rs9501548        | 6        | 31228552        | a        | g        | 0.0812        | 0.0041        | 0.0049        | 4.03E-01        | ??+        | 6.94E-02        |
| Monocytes        | rs10092988       | 8        | 130624661       | a        | g        | 0.3854        | -0.0098       | 0.0028        | 4.81E-04        | +--        | 2.02E-04        |
| Monocytes        | rs10100356       | 8        | 130626164       | a        | g        | 0.229         | -0.0074       | 0.0031        | 1.52E-02        | ---        | 9.51E-01        |
| Monocytes        | rs10956485       | 8        | 130620585       | t        | c        | 0.3076        | -0.0141       | 0.0029        | 1.07E-06        | ---        | 6.60E-06        |
| Monocytes        | rs12550563       | 8        | 130629300       | a        | g        | 0.2936        | -0.0086       | 0.0027        | 1.57E-03        | ---        | 6.24E-03        |
| Monocytes        | rs12681229       | 8        | 130623784       | t        | c        | 0.2914        | -0.0173       | 0.0036        | 1.87E-06        | --+        | 4.65E-04        |
| Monocytes        | rs13253638       | 8        | 130623190       | t        | c        | 0.4147        | -0.0221       | 0.0086        | 1.03E-02        | ?--        | 8.29E-01        |
| Monocytes        | rs13263823       | 8        | 130631510       | a        | c        | 0.4878        | -0.004        | 0.0025        | 1.10E-01        | --+        | 1.46E-02        |
| Monocytes        | rs13265608       | 8        | 130624121       | t        | c        | 0.0989        | 0.0181        | 0.0058        | 1.81E-03        | +++        | 1.03E-01        |
| Monocytes        | rs1433585        | 8        | 130626097       | a        | g        | 0.1356        | 0.0135        | 0.0041        | 9.94E-04        | +++        | 3.32E-03        |
| Monocytes        | rs1469737        | 8        | 130626936       | a        | g        | 0.0209        | -0.0094       | 0.0138        | 4.96E-01        | ??-        | 1.00E+00        |
| Monocytes        | rs1583333        | 8        | 130614899       | a        | c        | 0.2211        | 0.0173        | 0.0037        | 2.66E-06        | +++        | 1.89E-03        |
| Monocytes        | rs16893247       | 8        | 130625884       | t        | c        | 0.4523        | 0.0085        | 0.0042        | 4.28E-02        | +?+        | 2.21E-02        |
| Monocytes        | rs16904126       | 8        | 130627979       | a        | g        | 0.606         | -0.0131       | 0.0041        | 1.38E-03        | --+        | 2.16E-03        |



Table S1. Random-effects meta-analysis of MANTRA identified loci.

|                  |                   |          |                  |          |          |               |                |               |                 |            |                 |
|------------------|-------------------|----------|------------------|----------|----------|---------------|----------------|---------------|-----------------|------------|-----------------|
| Monocytes        | rs16904127        | 8        | 130628606        | a        | g        | 0.264         | -0.0079        | 0.0031        | 1.18E-02        | ---        | 7.43E-01        |
| Monocytes        | rs17180246        | 8        | 130623468        | t        | c        | 0.6634        | 0.0079         | 0.0052        | 1.28E-01        | ?++        | 1.28E-01        |
| Monocytes        | rs17180387        | 8        | 130624988        | t        | c        | 0.0729        | -0.0063        | 0.0059        | 2.91E-01        | ?-+        | 4.77E-02        |
| Monocytes        | rs1982094         | 8        | 130624816        | t        | c        | 0.5272        | -0.0173        | 0.0049        | 3.87E-04        | ---        | 4.34E-04        |
| <b>Monocytes</b> | <b>rs1991866</b>  | <b>8</b> | <b>130624105</b> | <b>c</b> | <b>g</b> | <b>0.5138</b> | <b>-0.0156</b> | <b>0.0024</b> | <b>1.21E-10</b> | <b>---</b> | <b>1.41E-07</b> |
| Monocytes        | rs7005206         | 8        | 130620813        | a        | g        | 0.1894        | 0.0073         | 0.0036        | 3.98E-02        | -++        | 4.86E-01        |
| Monocytes        | rs7814618         | 8        | 130627555        | t        | c        | 0.5916        | 0.0066         | 0.0028        | 1.83E-02        | +++        | 8.84E-03        |
| Monocytes        | rs7819128         | 8        | 130630157        | t        | c        | 0.3757        | -0.0067        | 0.0028        | 1.52E-02        | ---        | 1.11E-02        |
| Monocytes        | rs7823123         | 8        | 130628808        | t        | c        | 0.0262        | -0.0047        | 0.0117        | 6.88E-01        | ??-        | 1.00E+00        |
| Monocytes        | rs7825384         | 8        | 130626241        | a        | c        | 0.8726        | -0.0053        | 0.0045        | 2.43E-01        | ??-        | 1.00E+00        |
| Monocytes        | rs7828331         | 8        | 130631930        | a        | g        | 0.425         | 0.0051         | 0.0027        | 5.61E-02        | 0          | 7.49E-03        |
| Monocytes        | rs7830620         | 8        | 130627508        | a        | c        | 0.7442        | -0.0043        | 0.0035        | 2.23E-01        | ??-        | 1.00E+00        |
| Monocytes        | rs7834911         | 8        | 130628036        | t        | c        | 0.3566        | -0.0078        | 0.0026        | 3.05E-03        | ---        | 3.55E-03        |
| Monocytes        | rs10116508        | 9        | 113913415        | t        | c        | 0.1843        | 0.0075         | 0.0057        | 1.91E-01        | -?+        | 1.73E-01        |
| Monocytes        | rs10126017        | 9        | 113918933        | a        | g        | 0.4515        | -6.00E-04      | 0.0026        | 8.22E-01        | --+        | 5.87E-01        |
| Monocytes        | rs10217127        | 9        | 113919469        | t        | g        | 0.6003        | -0.0061        | 0.003         | 4.03E-02        | ++         | 4.10E-03        |
| Monocytes        | rs10217157        | 9        | 113919523        | t        | c        | 0.4802        | -0.0038        | 0.0026        | 1.49E-01        | ---        | 9.52E-01        |
| Monocytes        | rs10817156        | 9        | 113908195        | c        | g        | 0.4683        | -0.0011        | 0.0024        | 6.44E-01        | ++         | 2.42E-01        |
| Monocytes        | rs10980798        | 9        | 113912649        | t        | c        | 0.1948        | -0.0042        | 0.0031        | 1.86E-01        | ---        | 9.58E-01        |
| <b>Monocytes</b> | <b>rs10980800</b> | <b>9</b> | <b>113915905</b> | <b>t</b> | <b>c</b> | <b>0.2554</b> | <b>-0.0093</b> | <b>0.003</b>  | <b>2.23E-03</b> | <b>--+</b> | <b>7.40E-12</b> |
| Monocytes        | rs10980802        | 9        | 113918856        | a        | g        | 0.7128        | 0.0122         | 0.0029        | 2.37E-05        | ++         | 1.53E-06        |
| Monocytes        | rs10980805        | 9        | 113920552        | a        | c        | 0.4128        | 0.002          | 0.0026        | 4.35E-01        | --+        | 2.56E-01        |
| Monocytes        | rs12342967        | 9        | 113924902        | t        | c        | 0.5967        | -0.0119        | 0.0036        | 1.02E-03        | ---        | 2.83E-02        |
| Monocytes        | rs12345546        | 9        | 113919677        | a        | c        | 0.3243        | 5.00E-04       | 0.0028        | 8.43E-01        | ++         | 6.14E-01        |
| Monocytes        | rs12346772        | 9        | 113920599        | a        | g        | 0.6638        | -0.0226        | 0.0035        | 1.11E-10        | ---        | 8.14E-06        |
| Monocytes        | rs12350763        | 9        | 113923723        | a        | g        | 0.6447        | -0.0166        | 0.0032        | 1.42E-07        | ---        | 5.54E-08        |
| Monocytes        | rs1330280         | 9        | 113908312        | t        | c        | 0.8854        | 0.0033         | 0.0076        | 6.64E-01        | ?++        | 3.70E-01        |
| Monocytes        | rs1360284         | 9        | 113921689        | t        | g        | 0.2286        | -0.0028        | 0.0029        | 3.24E-01        | ---        | 9.06E-01        |
| Monocytes        | rs16915755        | 9        | 113916135        | t        | c        | 0.1795        | -0.0031        | 0.004         | 4.42E-01        | ??-        | 1.00E+00        |
| Monocytes        | rs16915757        | 9        | 113918391        | c        | g        | 0.8825        | 0.0047         | 0.0049        | 3.41E-01        | ??+        | 1.00E+00        |
| Monocytes        | rs16915769        | 9        | 113923169        | t        | c        | 0.1178        | -0.004         | 0.0048        | 4.09E-01        | ??-        | 1.00E+00        |
| Monocytes        | rs17811749        | 9        | 113916949        | a        | t        | 0.5784        | 0.0165         | 0.0047        | 4.76E-04        | +++        | 2.81E-01        |
| Monocytes        | rs2418136         | 9        | 113919300        | a        | t        | 0.5811        | 0.0162         | 0.0047        | 5.66E-04        | +++        | 2.83E-01        |
| Monocytes        | rs4541999         | 9        | 113907759        | a        | g        | 0.472         | -0.0011        | 0.0024        | 6.55E-01        | ++         | 2.58E-01        |
| Monocytes        | rs6477805         | 9        | 113920108        | a        | g        | 0.3302        | 0.001          | 0.0028        | 7.22E-01        | ++         | 7.57E-01        |
| Monocytes        | rs6477806         | 9        | 113920161        | t        | c        | 0.662         | 0.0023         | 0.0028        | 4.18E-01        | +++        | 8.45E-01        |
| Monocytes        | rs7023923         | 9        | 113925534        | t        | c        | 0.5666        | 0.0082         | 0.0025        | 1.15E-03        | ++         | 2.08E-08        |
| Monocytes        | rs7025176         | 9        | 113920511        | t        | c        | 0.0638        | -0.0076        | 0.0067        | 2.53E-01        | ??-        | 1.00E+00        |

Table S1. Random-effects meta-analysis of MANTRA identified loci.

|                    |                  |          |                 |          |          |               |                |               |                 |            |                 |
|--------------------|------------------|----------|-----------------|----------|----------|---------------|----------------|---------------|-----------------|------------|-----------------|
| Monocytes          | rs7034139        | 9        | 113924517       | a        | c        | 0.2196        | 0.0164         | 0.0032        | 1.99E-07        | +++        | 3.94E-08        |
| Monocytes          | rs7849209        | 9        | 113915676       | a        | g        | 0.8211        | 0.0057         | 0.0042        | 1.78E-01        | ??+        | 1.00E+00        |
| Monocytes          | rs7867745        | 9        | 113908101       | a        | g        | 0.5084        | 0.0166         | 0.0054        | 1.96E-03        | ++-        | 5.55E-02        |
| Monocytes          | rs7870066        | 9        | 113911613       | t        | c        | 0.6929        | 0.0037         | 0.003         | 2.10E-01        | +++        | 8.61E-01        |
| Monocytes          | rs9299192        | 9        | 113918647       | a        | t        | 0.3278        | 7.00E-04       | 0.0028        | 7.98E-01        | +++        | 5.70E-01        |
| Monocytes          | rs1371798        | 4        | 74976781        | t        | c        | 0.4721        | -0.0095        | 0.0031        | 2.14E-03        | --+        | 2.78E-09        |
| Neutrophils        | rs1371799        | 4        | 74977837        | t        | c        | 0.4367        | 0.0088         | 0.0031        | 4.66E-03        | +++        | 1.11E-10        |
| Neutrophils        | rs1837559        | 4        | 74959093        | a        | g        | 0.6052        | -0.0159        | 0.0047        | 6.64E-04        | -?-        | 3.55E-01        |
| Neutrophils        | rs1893319        | 4        | 74973129        | t        | c        | 0.5039        | 0.0152         | 0.0049        | 1.76E-03        | +?-        | 5.59E-02        |
| Neutrophils        | rs3806792        | 4        | 74965274        | t        | c        | 0.4472        | 0.0068         | 0.0033        | 3.95E-02        | +++        | 6.10E-08        |
| Neutrophils        | rs505197         | 4        | 74968560        | t        | c        | 0.9414        | 0.006          | 0.0189        | 7.53E-01        | ??+        | 7.12E-01        |
| Neutrophils        | rs549280         | 4        | 74971196        | a        | g        | 0.5094        | -0.0204        | 0.0042        | 9.52E-07        | -?-        | 5.14E-01        |
| <b>Neutrophils</b> | <b>rs7667376</b> | <b>4</b> | <b>74967890</b> | <b>t</b> | <b>c</b> | <b>0.4765</b> | <b>-0.0084</b> | <b>0.0031</b> | <b>6.04E-03</b> | <b>+++</b> | <b>1.02E-10</b> |
| Neutrophils        | rs9131           | 4        | 74963049        | t        | c        | 0.4904        | -0.006         | 0.0033        | 6.92E-02        | --+        | 1.62E-08        |
| Neutrophils        | rs10263804       | 7        | 92416590        | a        | g        | 0.877         | 5.00E-04       | 0.0108        | 9.63E-01        | ??+        | 1.00E+00        |
| Neutrophils        | rs2282995        | 7        | 92411623        | a        | g        | 0.6026        | -0.0129        | 0.0045        | 4.43E-03        | ---        | 8.34E-01        |
| Neutrophils        | rs3731303        | 7        | 92403859        | t        | c        | 0.3011        | 0.011          | 0.0045        | 1.52E-02        | +++        | 2.75E-01        |
| Neutrophils        | rs3731304        | 7        | 92403660        | a        | c        | 0.0161        | 0.0541         | 0.0309        | 7.96E-02        | ??+        | 1.00E+00        |
| Neutrophils        | rs3802072        | 7        | 92403053        | a        | g        | 0.1835        | 0.0152         | 0.0041        | 1.87E-04        | +++        | 7.54E-01        |
| Neutrophils        | rs3802073        | 7        | 92402480        | t        | c        | 0.3564        | 0.0052         | 0.0041        | 2.05E-01        | ++-        | 1.01E-02        |
| Neutrophils        | rs41461052       | 7        | 92407600        | t        | c        | 0.0564        | 0.0245         | 0.0158        | 1.21E-01        | ??+        | 1.00E+00        |
| <b>Neutrophils</b> | <b>rs445</b>     | <b>7</b> | <b>92408370</b> | <b>t</b> | <b>c</b> | <b>0.3892</b> | <b>-0.0093</b> | <b>0.0041</b> | <b>2.44E-02</b> | <b>+++</b> | <b>8.29E-11</b> |
| Neutrophils        | rs8              | 7        | 92408329        | t        | c        | 0.3711        | 0.002          | 0.0061        | 7.44E-01        | ?+-        | 6.30E-01        |
| Neutrophils        | rs10223710       | 6        | 32218681        | a        | g        | 0.5313        | -0.0066        | 0.0035        | 5.85E-02        | ---        | 4.40E-01        |
| Neutrophils        | rs10456405       | 6        | 32212867        | t        | g        | 0.1217        | -0.0076        | 0.0062        | 2.19E-01        | ?--        | 9.32E-01        |
| Neutrophils        | rs12525893       | 6        | 32220577        | t        | c        | 0.3564        | 0.0017         | 0.0037        | 6.53E-01        | ++-        | 8.87E-02        |
| Neutrophils        | rs13194642       | 6        | 32211695        | t        | c        | 0.3186        | 0.0039         | 0.0045        | 3.89E-01        | ++-        | 3.39E-01        |
| Neutrophils        | rs1559876        | 6        | 32215769        | c        | g        | 0.3299        | 0.0062         | 0.0032        | 5.55E-02        | ++-        | 7.10E-02        |
| Neutrophils        | rs17576984       | 6        | 32212985        | t        | c        | 0.27          | -0.0114        | 0.0046        | 1.28E-02        | ---        | 1.47E-01        |
| Neutrophils        | rs2395110        | 6        | 32215876        | a        | g        | 0.5005        | -9.00E-04      | 0.0041        | 8.23E-01        | +?-        | 1.83E-03        |
| Neutrophils        | rs2395111        | 6        | 32215964        | t        | c        | 0.4188        | -0.0124        | 0.003         | 2.85E-05        | ---        | 4.57E-01        |
| Neutrophils        | rs2515892        | 6        | 32215252        | t        | g        | 0.5302        | 0.0127         | 0.0029        | 1.62E-05        | +++        | 4.26E-01        |
| Neutrophils        | rs2894239        | 6        | 32215796        | t        | g        | 0.4538        | -0.0129        | 0.0031        | 2.25E-05        | ---        | 5.34E-01        |
| Neutrophils        | rs2894240        | 6        | 32217846        | a        | g        | 0.4249        | 0.0063         | 0.003         | 3.17E-02        | ++-        | 4.23E-04        |
| Neutrophils        | rs3096700        | 6        | 32221782        | a        | c        | 0.3014        | -0.0067        | 0.0046        | 1.52E-01        | -?+        | 9.48E-03        |
| Neutrophils        | rs3115571        | 6        | 32220918        | a        | g        | 0.3473        | -0.0121        | 0.0032        | 1.68E-04        | --+        | 2.74E-03        |
| Neutrophils        | rs3115572        | 6        | 32220484        | c        | g        | 0.3515        | -0.0125        | 0.0032        | 7.21E-05        | --+        | 4.39E-03        |
| Neutrophils        | rs3115573        | 6        | 32218843        | a        | g        | 0.5346        | -0.0039        | 0.0032        | 2.16E-01        | --+        | 1.61E-03        |

Table S1. Random-effects meta-analysis of MANTRA identified loci.

|                    |                  |          |                 |          |          |               |                |               |                 |            |                 |
|--------------------|------------------|----------|-----------------|----------|----------|---------------|----------------|---------------|-----------------|------------|-----------------|
| Neutrophils        | rs3115575        | 6        | 32216891        | t        | g        | 0.4655        | -0.013         | 0.003         | 1.11E-05        | ---        | 4.64E-01        |
| Neutrophils        | rs3115576        | 6        | 32216850        | a        | t        | 0.426         | 0.0063         | 0.003         | 3.33E-02        | ++-        | 4.52E-04        |
| Neutrophils        | rs3130304        | 6        | 32207181        | a        | g        | 0.186         | -0.0112        | 0.004         | 4.82E-03        | ---        | 7.30E-01        |
| Neutrophils        | rs3130309        | 6        | 32215472        | a        | g        | 0.3463        | -0.0125        | 0.0032        | 8.62E-05        | --+        | 3.82E-03        |
| Neutrophils        | rs3130310        | 6        | 32216911        | c        | g        | 0.524         | -0.0063        | 0.003         | 3.26E-02        | --+        | 5.28E-04        |
| Neutrophils        | rs3130311        | 6        | 32217367        | a        | g        | 0.5235        | -0.0062        | 0.003         | 3.55E-02        | --+        | 3.41E-04        |
| Neutrophils        | rs3130315        | 6        | 32220685        | a        | g        | 0.4244        | 0.0041         | 0.0032        | 2.00E-01        | ++-        | 1.97E-03        |
| Neutrophils        | rs3130316        | 6        | 32221228        | t        | c        | 0.4034        | -0.0153        | 0.0032        | 1.90E-06        | ---        | 2.96E-01        |
| Neutrophils        | rs3130320        | 6        | 32223258        | t        | c        | 0.4139        | -0.0154        | 0.0048        | 1.32E-03        | -?-        | 3.51E-01        |
| Neutrophils        | rs371156         | 6        | 32209963        | t        | c        | 0.431         | -0.0074        | 0.0032        | 2.08E-02        | ---        | 6.95E-01        |
| Neutrophils        | rs382259         | 6        | 32209027        | t        | c        | 0.438         | -0.0082        | 0.0034        | 1.46E-02        | ---        | 6.08E-01        |
| Neutrophils        | rs405875         | 6        | 32215188        | t        | c        | 0.4207        | -0.0125        | 0.003         | 2.36E-05        | ---        | 5.05E-01        |
| Neutrophils        | rs410283         | 6        | 32215198        | t        | g        | 0.5295        | 0.0126         | 0.003         | 1.90E-05        | +++        | 4.50E-01        |
| Neutrophils        | rs411326         | 6        | 32211317        | t        | c        | 0.4329        | -0.0044        | 0.0034        | 1.99E-01        | -+-        | 1.67E-03        |
| Neutrophils        | rs412492         | 6        | 32213831        | a        | t        | 0.4785        | -0.006         | 0.003         | 4.38E-02        | --+        | 3.90E-04        |
| Neutrophils        | rs412657         | 6        | 32211085        | t        | g        | 0.4331        | 0.0058         | 0.0031        | 6.47E-02        | ++-        | 6.92E-01        |
| Neutrophils        | rs416352         | 6        | 32207393        | t        | g        | 0.4314        | 0.0017         | 0.0031        | 5.78E-01        | --+        | 4.15E-03        |
| Neutrophils        | rs419132         | 6        | 32210799        | a        | g        | 0.4703        | -0.0025        | 0.0032        | 4.29E-01        | --+        | 1.17E-01        |
| Neutrophils        | rs424232         | 6        | 32208324        | t        | c        | 0.3828        | -7.00E-04      | 0.0033        | 8.43E-01        | ++-        | 1.30E-01        |
| Neutrophils        | rs427037         | 6        | 32212264        | a        | g        | 0.5252        | -0.0021        | 0.0033        | 5.22E-01        | --+        | 3.73E-02        |
| Neutrophils        | rs440169         | 6        | 32213788        | a        | g        | 0.4294        | 0.0066         | 0.003         | 2.88E-02        | ++-        | 1.19E-04        |
| Neutrophils        | rs454748         | 6        | 32213210        | a        | g        | 0.5132        | 0.0074         | 0.003         | 1.33E-02        | ++-        | 1.44E-03        |
| Neutrophils        | rs454875         | 6        | 32213008        | a        | g        | 0.1384        | 0.0059         | 0.005         | 2.39E-01        | +++        | 3.04E-01        |
| Neutrophils        | rs4959090        | 6        | 32219962        | a        | g        | 0.2316        | 0.0047         | 0.0037        | 1.98E-01        | ++-        | 3.58E-01        |
| Neutrophils        | rs507778         | 6        | 32209861        | t        | c        | 0.423         | 0.0012         | 0.0031        | 6.99E-01        | ++-        | 3.38E-02        |
| Neutrophils        | rs563412         | 6        | 32215063        | a        | g        | 0.4711        | 0.006          | 0.0029        | 4.22E-02        | ++-        | 4.22E-04        |
| Neutrophils        | rs6457508        | 6        | 32216963        | t        | c        | 0.4857        | 0.0129         | 0.003         | 1.32E-05        | +++        | 5.33E-01        |
| Neutrophils        | rs6457509        | 6        | 32217018        | c        | g        | 0.4247        | 0.0061         | 0.003         | 3.80E-02        | ++-        | 3.88E-04        |
| Neutrophils        | rs6457510        | 6        | 32217046        | t        | c        | 0.4854        | 0.0128         | 0.003         | 1.52E-05        | +++        | 5.35E-01        |
| Neutrophils        | rs6457515        | 6        | 32223785        | c        | g        | 0.2382        | -0.0095        | 0.0035        | 6.52E-03        | --+        | 5.07E-03        |
| Neutrophils        | rs6457516        | 6        | 32223830        | a        | t        | 0.5404        | 0.0101         | 0.0035        | 3.93E-03        | ++-        | 1.28E-02        |
| Neutrophils        | rs6908927        | 6        | 32224489        | a        | g        | 0.2385        | -0.01          | 0.0035        | 4.11E-03        | --+        | 1.30E-02        |
| Neutrophils        | rs6914780        | 6        | 32216529        | a        | t        | 0.0756        | 0.0063         | 0.0068        | 3.52E-01        | ++-        | 9.14E-01        |
| Neutrophils        | rs6915612        | 6        | 32218625        | a        | g        | 0.0628        | 0.0116         | 0.0145        | 4.22E-01        | ??+        | 1.00E+00        |
| Neutrophils        | rs6916062        | 6        | 32219041        | t        | c        | 0.4791        | 0.0033         | 0.0086        | 7.01E-01        | ?+-        | 3.03E-01        |
| Neutrophils        | rs6921945        | 6        | 32220037        | a        | c        | 0.5291        | -0.0062        | 0.0035        | 7.55E-02        | ---        | 5.29E-01        |
| <b>Neutrophils</b> | <b>rs6936204</b> | <b>6</b> | <b>32217092</b> | <b>t</b> | <b>c</b> | <b>0.4321</b> | <b>-0.0196</b> | <b>0.0035</b> | <b>2.72E-08</b> | <b>---</b> | <b>1.85E-01</b> |
| Neutrophils        | rs9267947        | 6        | 32211218        | a        | g        | 0.3727        | 0.0013         | 0.0032        | 6.78E-01        | ++-        | 2.08E-02        |

Table S1. Random-effects meta-analysis of MANTRA identified loci.

|                    |                  |           |                  |          |          |               |                 |                 |                 |            |                  |
|--------------------|------------------|-----------|------------------|----------|----------|---------------|-----------------|-----------------|-----------------|------------|------------------|
| Neutrophils        | rs9267948        | 6         | 32212233         | a        | g        | 0.6607        | -0.0015         | 0.0034          | 6.61E-01        | --+        | 2.82E-01         |
| Neutrophils        | rs9267954        | 6         | 32213052         | a        | t        | 0.826         | -0.0059         | 0.0055          | 2.84E-01        | -?-        | 7.49E-01         |
| Neutrophils        | rs9267955        | 6         | 32213150         | a        | g        | 0.0973        | 0.0033          | 0.012           | 7.84E-01        | ??+        | 1.00E+00         |
| Neutrophils        | rs9267956        | 6         | 32213638         | a        | g        | 0.6011        | -0.0039         | 0.0035          | 2.61E-01        | --+        | 9.66E-02         |
| Neutrophils        | rs9267958        | 6         | 32214616         | a        | c        | 0.5235        | -0.0062         | 0.003           | 3.67E-02        | --+        | 2.85E-04         |
| Neutrophils        | rs9267970        | 6         | 32217160         | a        | g        | 0.5211        | -0.0059         | 0.003           | 4.45E-02        | --+        | 3.12E-04         |
| Neutrophils        | rs9267971        | 6         | 32217185         | t        | c        | 0.4639        | -0.013          | 0.003           | 1.13E-05        | ---        | 4.42E-01         |
| Neutrophils        | rs9267992        | 6         | 32220397         | a        | g        | 0.9256        | -0.0033         | 0.0127          | 7.95E-01        | ??-        | 1.00E+00         |
| Neutrophils        | rs9268000        | 6         | 32223531         | a        | c        | 0.5759        | -0.0073         | 0.0033          | 2.56E-02        | --+        | 7.84E-02         |
| Neutrophils        | rs9296013        | 6         | 32216147         | a        | c        | 0.686         | 0.0098          | 0.0059          | 9.56E-02        | +--        | 4.43E-03         |
| Neutrophils        | rs9296015        | 6         | 32218989         | a        | g        | 0.2758        | 0.0085          | 0.0036          | 1.97E-02        | +++        | 2.37E-01         |
| Neutrophils        | rs9296016        | 6         | 32219010         | a        | t        | 0.2668        | 0.0063          | 0.0035          | 7.07E-02        | +++        | 5.09E-01         |
| Neutrophils        | rs9357138        | 6         | 32219838         | t        | c        | 0.3014        | 0.0045          | 0.0046          | 3.29E-01        | --+        | 3.08E-01         |
| <b>Neutrophils</b> | <b>rs8078723</b> | <b>17</b> | <b>38166879</b>  | <b>t</b> | <b>c</b> | <b>0.4046</b> | <b>-0.0307</b>  | <b>3.00E-03</b> | <b>5.02E-24</b> | <b>--+</b> | <b>4.23E-08</b>  |
| <b>Neutrophils</b> | <b>rs4794822</b> | <b>17</b> | <b>38156712</b>  | <b>t</b> | <b>c</b> | <b>0.496</b>  | <b>3.12E-02</b> | <b>3.00E-03</b> | <b>8.55E-25</b> | <b>++-</b> | <b>2.05E-07</b>  |
| WBC count          | rs16841659       | 1         | 159053650        | c        | g        | 0.9141        | 0.0122          | 0.004           | 2.33E-03        | -?+        | 2.62E-07         |
| WBC count          | rs16841682       | 1         | 159064818        | a        | c        | 0.6964        | 0.0017          | 0.0029          | 5.61E-01        | --+        | 4.63E-01         |
| WBC count          | rs1894043        | 1         | 159069211        | t        | c        | 0.2701        | 0.0166          | 0.0022          | 6.13E-14        | +++        | 5.79E-166        |
| WBC count          | rs2078724        | 1         | 159072108        | t        | c        | 0.5111        | 0.0334          | 0.0032          | 2.84E-25        | ?-+        | 4.32E-18         |
| WBC count          | rs2518561        | 1         | 159055124        | t        | c        | 0.5007        | 0.0343          | 0.0031          | 1.37E-28        | ?-+        | 9.41E-18         |
| WBC count          | rs2518562        | 1         | 159055656        | t        | c        | 0.5229        | -0.02           | 0.0022          | 2.42E-20        | ++-        | 1.45E-40         |
| <b>WBC count</b>   | <b>rs2518564</b> | <b>1</b>  | <b>159062436</b> | <b>a</b> | <b>g</b> | <b>0.4639</b> | <b>0.0365</b>   | <b>0.0021</b>   | <b>6.92E-69</b> | <b>+++</b> | <b>6.98E-258</b> |
| WBC count          | rs2518565        | 1         | 159070113        | a        | g        | 0.3318        | -0.0236         | 0.0021          | 1.46E-29        | +--        | 1.46E-58         |
| WBC count          | rs2814762        | 1         | 159068326        | a        | g        | 0.6498        | 0.053           | 0.0039          | 2.60E-42        | ?++        | 1.64E-04         |
| WBC count          | rs2814764        | 1         | 159064568        | a        | t        | 0.354         | -0.0273         | 0.0021          | 2.12E-39        | ---        | 3.17E-79         |
| WBC count          | rs2852720        | 1         | 159060560        | t        | c        | 0.3129        | 0.038           | 0.0027          | 4.16E-45        | +++        | 2.71E-41         |
| WBC count          | rs2852721        | 1         | 159068064        | t        | c        | 0.6737        | 0.0472          | 0.0044          | 4.39E-27        | --+        | 4.83E-08         |
| WBC count          | rs855866         | 1         | 159052720        | a        | g        | 0.3516        | -0.0348         | 0.0021          | 6.43E-64        | ---        | 1.98E-203        |
| WBC count          | rs855867         | 1         | 159052847        | a        | g        | 0.4913        | 0.0276          | 0.0021          | 2.27E-39        | +++        | 2.73E-83         |
| WBC count          | rs1371798        | 4         | 74976781         | t        | c        | 0.4882        | -0.0058         | 0.0018          | 1.56E-03        | --+        | 6.75E-11         |
| <b>WBC count</b>   | <b>rs1371799</b> | <b>4</b>  | <b>74977837</b>  | <b>t</b> | <b>c</b> | <b>0.4361</b> | <b>0.0052</b>   | <b>0.0018</b>   | <b>4.28E-03</b> | <b>++-</b> | <b>1.09E-12</b>  |
| WBC count          | rs1866755        | 4         | 74978340         | t        | c        | 0.4908        | -0.0053         | 0.0018          | 3.59E-03        | --+        | 2.30E-12         |
| WBC count          | rs1893319        | 4         | 74973129         | t        | c        | 0.4683        | 0.0111          | 0.0019          | 9.67E-09        | +++        | 2.51E-01         |
| WBC count          | rs505197         | 4         | 74968560         | t        | c        | 0.9264        | -0.0037         | 0.0143          | 7.94E-01        | +?-        | 6.04E-01         |
| WBC count          | rs549280         | 4         | 74971196         | a        | g        | 0.4733        | -0.011          | 0.0018          | 4.17E-10        | ---        | 7.41E-01         |
| WBC count          | rs551055         | 4         | 74981560         | a        | g        | 0.9486        | -0.0086         | 0.014           | 5.39E-01        | ??-        | 1.00E+00         |
| WBC count          | rs7667376        | 4         | 74967890         | t        | c        | 0.4918        | -0.005          | 0.0018          | 5.41E-03        | --+        | 2.92E-12         |
| WBC count          | rs10484494       | 6         | 135430093        | a        | g        | 0.0945        | -0.0127         | 0.0053          | 1.66E-02        | ?-+        | 1.18E-02         |

Table S1. Random-effects meta-analysis of MANTRA identified loci.

|                  |                  |          |                  |          |          |               |                |               |                 |            |                 |
|------------------|------------------|----------|------------------|----------|----------|---------------|----------------|---------------|-----------------|------------|-----------------|
| WBC count        | rs1074849        | 6        | 135423412        | a        | g        | 0.2266        | 0.0039         | 0.0022        | 7.07E-02        | +++        | 4.29E-01        |
| WBC count        | rs11154792       | 6        | 135431640        | t        | c        | 0.5275        | 0.0131         | 0.0026        | 5.39E-07        | +-?        | 5.35E-04        |
| WBC count        | rs11759553       | 6        | 135422296        | a        | t        | 0.5257        | 0.0108         | 0.0018        | 3.08E-09        | +-         | 1.43E-04        |
| WBC count        | rs1411919        | 6        | 135432061        | a        | g        | 0.5694        | -0.0047        | 0.0021        | 2.39E-02        | ---        | 6.19E-01        |
| WBC count        | rs2223385        | 6        | 135435171        | a        | g        | 0.2643        | 0.003          | 0.002         | 1.24E-01        | +++        | 9.16E-01        |
| WBC count        | rs4895440        | 6        | 135426558        | a        | t        | 0.5299        | 0.0107         | 0.0018        | 4.87E-09        | +-         | 5.78E-05        |
| <b>WBC count</b> | <b>rs4895441</b> | <b>6</b> | <b>135426573</b> | <b>a</b> | <b>g</b> | <b>0.5376</b> | <b>0.0131</b>  | <b>0.002</b>  | <b>2.50E-11</b> | <b>+++</b> | <b>1.63E-02</b> |
| WBC count        | rs6920211        | 6        | 135431318        | t        | c        | 0.4331        | 0.0126         | 0.0019        | 1.98E-11        | +++        | 1.48E-02        |
| WBC count        | rs6930223        | 6        | 135424203        | t        | g        | 0.5024        | -0.0095        | 0.0018        | 1.73E-07        | ---        | 6.28E-02        |
| WBC count        | rs7743042        | 6        | 135419834        | a        | g        | 0.3901        | 0.0058         | 0.0018        | 1.29E-03        | +-         | 1.45E-01        |
| WBC count        | rs7743480        | 6        | 135420064        | t        | c        | 0.8608        | -0.0032        | 0.0082        | 6.98E-01        | ??-        | 1.00E+00        |
| WBC count        | rs7766963        | 6        | 135432883        | t        | c        | 0.4892        | 0.0089         | 0.0018        | 1.05E-06        | +++        | 6.60E-01        |
| WBC count        | rs7775698        | 6        | 135418635        | t        | c        | 0.4712        | -0.0102        | 0.0025        | 3.81E-05        | -?+        | 7.84E-04        |
| WBC count        | rs7776054        | 6        | 135418916        | a        | g        | 0.552         | 0.012          | 0.0019        | 2.99E-10        | +++        | 8.84E-02        |
| WBC count        | rs9373124        | 6        | 135423209        | t        | c        | 0.4582        | 0.0113         | 0.0018        | 1.06E-09        | +-         | 3.47E-04        |
| WBC count        | rs9376092        | 6        | 135427144        | a        | c        | 0.305         | -0.0115        | 0.002         | 4.28E-09        | --         | 5.63E-04        |
| WBC count        | rs9389268        | 6        | 135419631        | a        | g        | 0.553         | 0.0115         | 0.0019        | 1.55E-09        | +++        | 2.31E-02        |
| WBC count        | rs9389269        | 6        | 135427159        | t        | c        | 0.4243        | 0.013          | 0.002         | 5.11E-11        | +-         | 5.78E-03        |
| WBC count        | rs9399137        | 6        | 135419018        | t        | c        | 0.4372        | 0.0116         | 0.002         | 8.29E-09        | +-         | 4.87E-04        |
| WBC count        | rs9402684        | 6        | 135419305        | t        | c        | 0.4589        | 0.006          | 0.0018        | 8.67E-04        | +-         | 2.26E-01        |
| WBC count        | rs9402686        | 6        | 135427817        | a        | g        | 0.3027        | -0.0138        | 0.002         | 4.45E-12        | ---        | 8.24E-02        |
| WBC count        | rs9483787        | 6        | 135434609        | a        | c        | 0.1372        | -0.0015        | 0.0051        | 7.71E-01        | ??-        | 1.00E+00        |
| WBC count        | rs9483788        | 6        | 135435501        | t        | c        | 0.4333        | 0.0128         | 0.0021        | 1.39E-09        | +++        | 4.18E-01        |
| WBC count        | rs9494140        | 6        | 135430029        | t        | c        | 0.883         | -7.00E-04      | 0.0057        | 9.02E-01        | ??-        | 1.00E+00        |
| WBC count        | rs9494141        | 6        | 135430299        | t        | c        | 0.2024        | 0.0061         | 0.0045        | 1.78E-01        | ??+        | 1.00E+00        |
| WBC count        | rs9494144        | 6        | 135432530        | t        | c        | 0.8832        | -0.0013        | 0.0056        | 8.15E-01        | ??-        | 1.00E+00        |
| WBC count        | rs9494145        | 6        | 135432552        | t        | c        | 0.466         | 0.0124         | 0.0022        | 1.83E-08        | +++        | 2.33E-01        |
| WBC count        | rs10263804       | 7        | 92416590         | a        | g        | 0.8781        | -0.0138        | 0.0057        | 1.48E-02        | ??-        | 1.00E+00        |
| WBC count        | rs2282995        | 7        | 92411623         | a        | g        | 0.6411        | -0.0064        | 0.0026        | 1.24E-02        | --         | 1.09E-01        |
| WBC count        | rs3731303        | 7        | 92403859         | t        | c        | 0.3141        | 0.0069         | 0.0026        | 7.41E-03        | +++        | 1.55E-01        |
| WBC count        | rs3731304        | 7        | 92403660         | a        | c        | 0.0157        | 0.0409         | 0.0235        | 8.13E-02        | ??+        | 1.00E+00        |
| WBC count        | rs3802072        | 7        | 92403053         | a        | g        | 0.1923        | 0.0078         | 0.0023        | 6.82E-04        | +++        | 2.15E-01        |
| WBC count        | rs3802073        | 7        | 92402480         | t        | c        | 0.3701        | 0.0023         | 0.0023        | 3.16E-01        | +-         | 1.06E-03        |
| WBC count        | rs41461052       | 7        | 92407600         | t        | c        | 0.0578        | 0.0086         | 0.0082        | 2.96E-01        | ??+        | 1.00E+00        |
| <b>WBC count</b> | <b>rs445</b>     | <b>7</b> | <b>92408370</b>  | <b>t</b> | <b>c</b> | <b>0.4013</b> | <b>-0.0098</b> | <b>0.0023</b> | <b>2.19E-05</b> | <b>--</b>  | <b>8.92E-14</b> |
| WBC count        | rs8              | 7        | 92408329         | t        | c        | 0.4051        | 0.0028         | 0.0037        | 4.55E-01        | ??+        | 8.68E-01        |
| WBC count        | rs1006122        | 2        | 113785842        | c        | g        | 0.5553        | -3.00E-04      | 0.0024        | 9.04E-01        | +-         | 5.58E-01        |
| WBC count        | rs1013477        | 2        | 113777408        | t        | c        | 0.3527        | -0.0016        | 0.0019        | 3.78E-01        | -+         | 7.87E-02        |

Table S1. Random-effects meta-analysis of MANTRA identified loci.

|           |            |   |           |   |   |        |           |        |          |     |          |
|-----------|------------|---|-----------|---|---|--------|-----------|--------|----------|-----|----------|
| WBC count | rs10165797 | 2 | 113828450 | a | c | 0.4294 | -0.004    | 0.0018 | 2.39E-02 | --- | 6.89E-01 |
| WBC count | rs10169599 | 2 | 113838652 | t | c | 0.3387 | 0.002     | 0.002  | 3.38E-01 | ++- | 1.27E-01 |
| WBC count | rs10176274 | 2 | 113840575 | c | g | 0.5542 | -0.0096   | 0.0021 | 7.81E-06 | --- | 5.14E-01 |
| WBC count | rs10179714 | 2 | 113805118 | a | g | 0.1941 | -0.0061   | 0.0028 | 2.97E-02 | -?+ | 9.58E-02 |
| WBC count | rs10181720 | 2 | 113838608 | a | g | 0.4625 | -0.0044   | 0.002  | 2.98E-02 | --- | 7.17E-01 |
| WBC count | rs10184259 | 2 | 113838628 | t | c | 0.5216 | -0.0022   | 0.002  | 2.75E-01 | --+ | 9.61E-02 |
| WBC count | rs10184277 | 2 | 113823485 | t | c | 0.2994 | -0.0076   | 0.0032 | 1.77E-02 | -?+ | 1.38E-01 |
| WBC count | rs10185781 | 2 | 113849150 | a | c | 0.2666 | -0.0046   | 0.0022 | 3.25E-02 | --+ | 1.56E-01 |
| WBC count | rs10186133 | 2 | 113836944 | t | g | 0.3634 | 0.0037    | 0.0019 | 5.57E-02 | ++- | 3.67E-02 |
| WBC count | rs10188292 | 2 | 113840443 | a | t | 0.5807 | -0.0091   | 0.0021 | 1.52E-05 | --- | 1.83E-01 |
| WBC count | rs10192014 | 2 | 113922412 | a | g | 0.3613 | 0.0015    | 0.0036 | 6.67E-01 | ??+ | 6.96E-01 |
| WBC count | rs10199363 | 2 | 113840791 | a | g | 0.9191 | 0.0144    | 0.005  | 3.73E-03 | ??+ | 5.58E-01 |
| WBC count | rs10205381 | 2 | 113753124 | a | g | 0.1217 | 5.00E-04  | 0.0056 | 9.28E-01 | ??+ | 1.00E+00 |
| WBC count | rs10206428 | 2 | 113826475 | a | g | 0.3829 | -0.0048   | 0.0018 | 7.06E-03 | --- | 2.56E-01 |
| WBC count | rs10207930 | 2 | 113860861 | a | c | 0.4591 | 0.0041    | 0.0018 | 2.72E-02 | ++- | 6.02E-03 |
| WBC count | rs10496447 | 2 | 113782059 | a | g | 0.5997 | 0.0019    | 0.003  | 5.31E-01 | --+ | 3.98E-02 |
| WBC count | rs10496448 | 2 | 113828690 | c | g | 0.197  | -0.0083   | 0.0029 | 4.83E-03 | -?- | 6.23E-01 |
| WBC count | rs10514809 | 2 | 113781077 | t | c | 0.022  | -0.0031   | 0.0187 | 8.69E-01 | ??- | 1.00E+00 |
| WBC count | rs10864909 | 2 | 113750230 | a | g | 0.4359 | 0.0025    | 0.002  | 2.04E-01 | ++- | 3.01E-01 |
| WBC count | rs10864910 | 2 | 113935222 | t | c | 0.5149 | 0         | 0.0021 | 9.87E-01 | ++- | 4.71E-01 |
| WBC count | rs11123158 | 2 | 113811057 | a | g | 0.2844 | -0.0062   | 0.0025 | 1.39E-02 | -?- | 3.25E-01 |
| WBC count | rs11123159 | 2 | 113834030 | t | c | 0.451  | 0.0049    | 0.0024 | 3.56E-02 | ++- | 6.21E-02 |
| WBC count | rs11123161 | 2 | 113845578 | t | c | 0.37   | -3.00E-04 | 0.0018 | 8.57E-01 | -+- | 4.59E-04 |
| WBC count | rs11123162 | 2 | 113850114 | a | g | 0.4476 | -0.0022   | 0.002  | 2.65E-01 | ++- | 3.71E-02 |
| WBC count | rs11123167 | 2 | 113906869 | c | g | 0.3792 | 0.0055    | 0.0021 | 7.77E-03 | +++ | 6.62E-01 |
| WBC count | rs1156701  | 2 | 113827845 | a | g | 0.09   | 0.0012    | 0.0031 | 6.94E-01 | ++- | 1.58E-01 |
| WBC count | rs11677140 | 2 | 113865808 | a | c | 0.5441 | 2.00E-04  | 0.0022 | 9.11E-01 | -+- | 3.03E-01 |
| WBC count | rs11677407 | 2 | 113845029 | t | c | 0.3456 | -0.0042   | 0.0022 | 5.36E-02 | --+ | 8.75E-02 |
| WBC count | rs11678375 | 2 | 113835691 | t | c | 0.5782 | -0.0039   | 0.0019 | 4.44E-02 | --+ | 3.72E-02 |
| WBC count | rs11681884 | 2 | 113847628 | t | c | 0.3522 | -0.0044   | 0.0021 | 4.18E-02 | --+ | 1.50E-01 |
| WBC count | rs11684289 | 2 | 113845038 | t | g | 0.4912 | 0.0036    | 0.0021 | 9.64E-02 | ++- | 4.58E-02 |
| WBC count | rs11684719 | 2 | 113842401 | a | g | 0.2257 | -0.0089   | 0.0022 | 7.35E-05 | --- | 7.36E-01 |
| WBC count | rs11687782 | 2 | 113841782 | a | t | 0.464  | 0.0036    | 0.0019 | 5.40E-02 | ++- | 6.19E-04 |
| WBC count | rs11687786 | 2 | 113811731 | t | g | 0.6431 | 7.00E-04  | 0.0026 | 7.99E-01 | -?+ | 1.57E-01 |
| WBC count | rs11693683 | 2 | 113850653 | a | t | 0.3944 | 0.0046    | 0.0031 | 1.46E-01 | +++ | 6.89E-02 |
| WBC count | rs11883847 | 2 | 113792171 | t | c | 0.4891 | 0.0019    | 0.0037 | 6.01E-01 | ?-+ | 7.66E-03 |
| WBC count | rs11885498 | 2 | 113900177 | a | g | 0.5914 | -0.0056   | 0.0021 | 7.00E-03 | --- | 8.64E-01 |
| WBC count | rs11886754 | 2 | 113844342 | c | g | 0.5648 | 0.0056    | 0.0021 | 8.03E-03 | +++ | 3.53E-01 |

Table S1. Random-effects meta-analysis of MANTRA identified loci.

|           |            |   |           |   |   |        |           |        |          |     |          |
|-----------|------------|---|-----------|---|---|--------|-----------|--------|----------|-----|----------|
| WBC count | rs11891198 | 2 | 113844229 | a | g | 0.5745 | 0.0056    | 0.0022 | 1.04E-02 | +++ | 3.58E-01 |
| WBC count | rs11893386 | 2 | 113844310 | t | c | 0.4927 | 0.0041    | 0.0022 | 5.97E-02 | ++- | 7.29E-02 |
| WBC count | rs11896207 | 2 | 113850882 | t | c | 0.7353 | -0.0111   | 0.0052 | 3.35E-02 | ?+- | 4.49E-02 |
| WBC count | rs11897481 | 2 | 113851439 | t | c | 0.3521 | -0.0045   | 0.0021 | 3.79E-02 | --+ | 1.63E-01 |
| WBC count | rs11898158 | 2 | 113823572 | a | g | 0.5168 | 0.0098    | 0.0035 | 4.71E-03 | ?++ | 1.65E-01 |
| WBC count | rs11898742 | 2 | 113845392 | a | g | 0.0721 | 0.002     | 0.0103 | 8.46E-01 | ??+ | 1.00E+00 |
| WBC count | rs11899198 | 2 | 113840539 | t | g | 0.3744 | -0.0022   | 0.0022 | 3.38E-01 | --+ | 5.28E-04 |
| WBC count | rs12328368 | 2 | 113847144 | c | g | 0.5653 | -0.0109   | 0.0021 | 1.21E-07 | --- | 2.28E-01 |
| WBC count | rs12328766 | 2 | 113846738 | a | g | 0.5217 | -0.0098   | 0.0021 | 3.43E-06 | --- | 4.62E-01 |
| WBC count | rs12329129 | 2 | 113847007 | a | g | 0.3445 | 0.0108    | 0.0021 | 2.00E-07 | +++ | 2.27E-01 |
| WBC count | rs12466799 | 2 | 113835999 | t | c | 0.566  | -0.0025   | 0.0021 | 2.33E-01 | --+ | 2.52E-01 |
| WBC count | rs12469822 | 2 | 113830563 | a | g | 0.3218 | 0.0038    | 0.0019 | 4.90E-02 | ++- | 5.14E-01 |
| WBC count | rs12614131 | 2 | 113924738 | t | c | 0.5134 | 0.0026    | 0.0034 | 4.55E-01 | ??+ | 7.17E-01 |
| WBC count | rs12475161 | 2 | 113823626 | t | c | 0.4316 | -0.0014   | 0.0018 | 4.44E-01 | --+ | 1.01E-03 |
| WBC count | rs12475781 | 2 | 113916912 | t | g | 0.3051 | 0.0042    | 0.002  | 3.57E-02 | +++ | 4.29E-01 |
| WBC count | rs12475887 | 2 | 113849986 | a | c | 0.4035 | -2.00E-04 | 0.0024 | 9.50E-01 | ++- | 1.23E-01 |
| WBC count | rs12614131 | 2 | 113930867 | t | c | 0.3588 | 0.0018    | 0.0027 | 5.04E-01 | ++- | 1.20E-01 |
| WBC count | rs12711746 | 2 | 113752247 | a | c | 0.4277 | 0.0032    | 0.002  | 9.87E-02 | ++- | 3.19E-01 |
| WBC count | rs12711747 | 2 | 113785020 | a | g | 0.4022 | 2.00E-04  | 0.002  | 9.34E-01 | -+- | 2.82E-01 |
| WBC count | rs12711749 | 2 | 113829709 | a | g | 0.4848 | -0.0015   | 0.0018 | 4.12E-01 | -+- | 9.60E-02 |
| WBC count | rs12711751 | 2 | 113837765 | t | g | 0.5337 | -0.0023   | 0.002  | 2.59E-01 | --+ | 2.61E-02 |
| WBC count | rs12711752 | 2 | 113837840 | t | c | 0.562  | -9.00E-04 | 0.002  | 6.36E-01 | --+ | 5.91E-01 |
| WBC count | rs12711762 | 2 | 113932800 | t | c | 0.3161 | -3.00E-04 | 0.002  | 9.02E-01 | --+ | 5.81E-01 |
| WBC count | rs12711763 | 2 | 113932811 | c | g | 0.7857 | -0.0045   | 0.0032 | 1.60E-01 | -+- | 7.50E-01 |
| WBC count | rs12711765 | 2 | 113936036 | a | g | 0.5017 | -0.0028   | 0.0039 | 4.74E-01 | ??- | 1.00E+00 |
| WBC count | rs128964   | 2 | 113887803 | a | g | 0.4888 | 0.0059    | 0.0026 | 2.27E-02 | +++ | 6.79E-01 |
| WBC count | rs13011842 | 2 | 113833570 | t | c | 0.3867 | -0.0027   | 0.0026 | 2.87E-01 | --+ | 5.64E-01 |
| WBC count | rs13019891 | 2 | 113829869 | t | g | 0.4386 | 0.0038    | 0.002  | 6.20E-02 | +++ | 9.47E-01 |
| WBC count | rs13030546 | 2 | 113840014 | a | g | 0.5508 | 0.0031    | 0.0027 | 2.48E-01 | ++- | 4.04E-01 |
| WBC count | rs13033104 | 2 | 113756777 | t | g | 0.4674 | 0.0049    | 0.002  | 1.24E-02 | ++- | 4.90E-01 |
| WBC count | rs13382561 | 2 | 113863536 | a | g | 0.5636 | -0.0104   | 0.0021 | 1.28E-06 | --- | 1.52E-01 |
| WBC count | rs13386602 | 2 | 113834820 | a | c | 0.5207 | -0.006    | 0.0019 | 1.77E-03 | --- | 5.82E-01 |
| WBC count | rs13389431 | 2 | 113851830 | a | g | 0.0884 | 2.00E-04  | 0.0064 | 9.75E-01 | ??+ | 1.00E+00 |
| WBC count | rs13398728 | 2 | 113842506 | t | c | 0.4349 | -0.0052   | 0.0021 | 1.33E-02 | --+ | 3.38E-04 |
| WBC count | rs13404928 | 2 | 113866525 | a | g | 0.2362 | -2.00E-04 | 0.0022 | 9.23E-01 | --+ | 4.49E-01 |
| WBC count | rs13406085 | 2 | 113861561 | a | g | 0.2624 | -0.005    | 0.0022 | 2.05E-02 | --- | 2.77E-01 |
| WBC count | rs13407508 | 2 | 113794759 | t | c | 0.6701 | 8.00E-04  | 0.0024 | 7.38E-01 | +?- | 2.20E-02 |
| WBC count | rs13409360 | 2 | 113838102 | a | g | 0.3925 | 0.0056    | 0.0021 | 7.74E-03 | +++ | 7.97E-02 |

Table S1. Random-effects meta-analysis of MANTRA identified loci.

|           |            |   |           |   |   |        |           |        |          |      |          |
|-----------|------------|---|-----------|---|---|--------|-----------|--------|----------|------|----------|
| WBC count | rs13409371 | 2 | 113838145 | a | g | 0.4052 | 0.0057    | 0.0021 | 6.81E-03 | +++  | 1.20E-01 |
| WBC count | rs13410552 | 2 | 113855406 | c | g | 0.5813 | 0.0043    | 0.0022 | 4.67E-02 | ++-  | 1.36E-01 |
| WBC count | rs13410964 | 2 | 113843283 | a | g | 0.3262 | 0.0096    | 0.0021 | 5.35E-06 | +++  | 2.22E-01 |
| WBC count | rs13414333 | 2 | 113752731 | a | g | 0.9226 | 0.0044    | 0.0069 | 5.23E-01 | ??+  | 1.00E+00 |
| WBC count | rs13419549 | 2 | 113933726 | t | c | 0.3229 | -4.00E-04 | 0.0034 | 9.13E-01 | +--  | 2.78E-01 |
| WBC count | rs13424580 | 2 | 113852564 | a | g | 0.3039 | 0.0086    | 0.0022 | 9.81E-05 | +++  | 1.13E-01 |
| WBC count | rs1374280  | 2 | 113796666 | t | c | 0.4015 | 6.00E-04  | 0.0021 | 7.68E-01 | -++  | 8.49E-01 |
| WBC count | rs1374281  | 2 | 113898789 | c | g | 0.5901 | -0.0051   | 0.0021 | 1.35E-02 | ---  | 8.37E-01 |
| WBC count | rs1374284  | 2 | 113753583 | t | c | 0.5857 | -9.00E-04 | 0.002  | 6.58E-01 | -++  | 8.74E-02 |
| WBC count | rs1446509  | 2 | 113851159 | a | t | 0.5637 | -0.0105   | 0.0021 | 5.29E-07 | ---  | 2.65E-01 |
| WBC count | rs1446510  | 2 | 113851517 | t | c | 0.4689 | 0.0015    | 0.0022 | 4.83E-01 | ++-  | 6.01E-06 |
| WBC count | rs1446511  | 2 | 113762543 | t | c | 0.4751 | -6.00E-04 | 0.0026 | 8.05E-01 | ?+-  | 3.87E-01 |
| WBC count | rs1446512  | 2 | 113762532 | t | g | 0.4751 | -6.00E-04 | 0.0026 | 8.28E-01 | ?+-  | 3.78E-01 |
| WBC count | rs1446514  | 2 | 113757973 | t | g | 0.2951 | 5.00E-04  | 0.0023 | 8.18E-01 | ?-+  | 3.78E-01 |
| WBC count | rs1446515  | 2 | 113757654 | a | t | 0.4745 | -0.002    | 0.0023 | 3.92E-01 | ?--  | 5.66E-01 |
| WBC count | rs1446516  | 2 | 113750470 | a | g | 0.5939 | -0.0025   | 0.0023 | 2.89E-01 | +--  | 1.59E-01 |
| WBC count | rs1446519  | 2 | 113822448 | t | c | 0.3881 | -0.0053   | 0.0029 | 7.11E-02 | ?-+  | 2.03E-02 |
| WBC count | rs1446521  | 2 | 113827396 | a | g | 0.4857 | 0.0022    | 0.0026 | 4.08E-01 | +++  | 4.93E-01 |
| WBC count | rs1446522  | 2 | 113827503 | c | g | 0.0934 | 7.00E-04  | 0.0031 | 8.14E-01 | ++-  | 1.26E-01 |
| WBC count | rs1530549  | 2 | 113817455 | t | c | 0.3364 | -0.0046   | 0.003  | 1.26E-01 | ---  | 5.52E-01 |
| WBC count | rs1530550  | 2 | 113817513 | a | t | 0.5784 | 0.0046    | 0.0022 | 3.25E-02 | -++  | 6.88E-02 |
| WBC count | rs1530551  | 2 | 113817566 | t | c | 0.482  | 0.0018    | 0.0022 | 4.06E-01 | + +- | 2.46E-02 |
| WBC count | rs1542176  | 2 | 113849837 | t | c | 0.3579 | -0.0013   | 0.0019 | 4.90E-01 | -+-  | 3.66E-03 |
| WBC count | rs1562302  | 2 | 113810458 | a | g | 0.3777 | 0.0011    | 0.002  | 5.89E-01 | +--  | 1.85E-01 |
| WBC count | rs1562303  | 2 | 113782392 | t | c | 0.2935 | 0.0073    | 0.004  | 6.89E-02 | ??+  | 1.00E+00 |
| WBC count | rs1562305  | 2 | 113751613 | a | g | 0.3701 | 0.0028    | 0.002  | 1.62E-01 | ++-  | 4.51E-01 |
| WBC count | rs1562306  | 2 | 113751380 | a | g | 0.2937 | 0.002     | 0.0023 | 3.86E-01 | -++  | 7.36E-01 |
| WBC count | rs1596894  | 2 | 113754754 | t | c | 0.4851 | 6.00E-04  | 0.0025 | 7.96E-01 | ?+-  | 8.15E-01 |
| WBC count | rs1630153  | 2 | 113869803 | t | c | 0.34   | 0.0032    | 0.0019 | 8.82E-02 | -++  | 5.83E-03 |
| WBC count | rs1665188  | 2 | 113852789 | c | g | 0.0769 | -0.0143   | 0.0054 | 7.89E-03 | -?-  | 4.03E-01 |
| WBC count | rs1688072  | 2 | 113869347 | a | g | 0.4789 | 0.0059    | 0.0029 | 3.90E-02 | +++  | 1.35E-01 |
| WBC count | rs1688075  | 2 | 113858196 | a | c | 0.3855 | -0.0016   | 0.0025 | 5.22E-01 | -++  | 8.58E-02 |
| WBC count | rs17042691 | 2 | 113745812 | t | c | 0.34   | 3.00E-04  | 0.0022 | 8.92E-01 | -+-  | 4.36E-02 |
| WBC count | rs17042709 | 2 | 113788100 | a | g | 0.2321 | -0.0065   | 0.0027 | 1.63E-02 | -?-  | 8.09E-01 |
| WBC count | rs17042712 | 2 | 113788194 | c | g | 0.7978 | 0.001     | 0.0047 | 8.33E-01 | ?+-  | 5.56E-02 |
| WBC count | rs17042750 | 2 | 113823151 | t | g | 0.0983 | -0.0038   | 0.0037 | 3.01E-01 | ?+-  | 1.42E-03 |
| WBC count | rs17042751 | 2 | 113823365 | t | c | 0.395  | 0.0019    | 0.0026 | 4.67E-01 | ++-  | 4.02E-01 |
| WBC count | rs17042755 | 2 | 113824585 | c | g | 0.1835 | 0.0023    | 0.0026 | 3.78E-01 | +++  | 4.61E-01 |



Table S1. Random-effects meta-analysis of MANTRA identified loci.

|           |            |   |           |   |   |        |          |        |          |     |          |
|-----------|------------|---|-----------|---|---|--------|----------|--------|----------|-----|----------|
| WBC count | rs17042786 | 2 | 113827859 | t | c | 0.4314 | -0.007   | 0.0026 | 7.70E-03 | -?- | 3.96E-01 |
| WBC count | rs17042795 | 2 | 113829840 | a | g | 0.6782 | -0.016   | 0.0039 | 3.61E-05 | ?-- | 4.31E-01 |
| WBC count | rs17042810 | 2 | 113838569 | t | c | 0.3626 | -0.0026  | 0.0025 | 3.03E-01 | --+ | 1.93E-04 |
| WBC count | rs17042815 | 2 | 113839857 | c | g | 0.0865 | 0.0151   | 0.0052 | 3.47E-03 | ?++ | 4.88E-01 |
| WBC count | rs17042819 | 2 | 113840039 | a | g | 0.7307 | -0.0127  | 0.0051 | 1.26E-02 | ?-- | 6.53E-01 |
| WBC count | rs17042827 | 2 | 113840657 | a | g | 0.9737 | -0.0179  | 0.0116 | 1.24E-01 | ??- | 1.00E+00 |
| WBC count | rs17042828 | 2 | 113840934 | t | c | 0.087  | 0.0112   | 0.0051 | 2.76E-02 | ?-+ | 3.92E-02 |
| WBC count | rs17042833 | 2 | 113842279 | t | c | 0.7301 | -0.0093  | 0.0051 | 6.87E-02 | ?+- | 6.32E-02 |
| WBC count | rs17042838 | 2 | 113843337 | a | g | 0.1572 | 3.00E-04 | 0.0049 | 9.52E-01 | ??+ | 1.00E+00 |
| WBC count | rs17042842 | 2 | 113843481 | a | g | 0.7399 | -0.016   | 0.0049 | 1.21E-03 | ?-- | 4.29E-01 |
| WBC count | rs17042853 | 2 | 113848200 | a | t | 0.2659 | -0.0054  | 0.0021 | 1.14E-02 | --- | 3.61E-01 |
| WBC count | rs17042869 | 2 | 113849691 | a | g | 0.0419 | 0.0255   | 0.0093 | 5.90E-03 | ??+ | 1.00E+00 |
| WBC count | rs17042888 | 2 | 113862173 | a | g | 0.1744 | -0.0094  | 0.0024 | 8.74E-05 | --- | 4.56E-01 |
| WBC count | rs17042894 | 2 | 113864047 | a | g | 0.0704 | 0.0152   | 0.0054 | 4.62E-03 | ?++ | 5.09E-01 |
| WBC count | rs17042905 | 2 | 113867956 | t | c | 0.36   | -0.0027  | 0.0024 | 2.61E-01 | --+ | 5.60E-05 |
| WBC count | rs17042917 | 2 | 113870663 | a | g | 0.1702 | -0.0096  | 0.0024 | 7.04E-05 | --- | 2.02E-01 |
| WBC count | rs17043030 | 2 | 113926885 | t | c | 0.709  | -0.0028  | 0.0042 | 4.99E-01 | ?+- | 1.26E-01 |
| WBC count | rs17043031 | 2 | 113930864 | a | g | 0.8963 | 0.0043   | 0.0069 | 5.38E-01 | +?+ | 6.99E-01 |
| WBC count | rs17043037 | 2 | 113932352 | t | g | 0.0471 | 0.0162   | 0.0144 | 2.61E-01 | ??+ | 1.00E+00 |
| WBC count | rs17043041 | 2 | 113933432 | t | g | 0.9406 | -0.0044  | 0.0113 | 6.98E-01 | ??- | 1.00E+00 |
| WBC count | rs17043051 | 2 | 113933804 | t | c | 0.5665 | -0.0015  | 0.0028 | 5.86E-01 | -?+ | 3.67E-02 |
| WBC count | rs17043057 | 2 | 113934413 | t | c | 0.9525 | -0.0164  | 0.0142 | 2.48E-01 | ??- | 1.00E+00 |
| WBC count | rs17043069 | 2 | 113935807 | t | g | 0.8678 | 0.0042   | 0.0059 | 4.74E-01 | ??+ | 1.00E+00 |
| WBC count | rs17207494 | 2 | 113864010 | a | c | 0.582  | -0.0088  | 0.0022 | 6.34E-05 | --- | 7.57E-02 |
| WBC count | rs17486819 | 2 | 113871806 | t | g | 0.0808 | -0.0027  | 0.004  | 4.90E-01 | ?+- | 1.86E-03 |
| WBC count | rs17624213 | 2 | 113933247 | t | g | 0.2778 | -0.0027  | 0.0026 | 3.07E-01 | --- | 9.52E-01 |
| WBC count | rs17660913 | 2 | 113782329 | a | g | 0.559  | 7.00E-04 | 0.0028 | 8.09E-01 | --+ | 2.30E-02 |
| WBC count | rs17669228 | 2 | 113847712 | t | c | 0.3496 | 0.0059   | 0.003  | 4.71E-02 | +?+ | 4.05E-03 |
| WBC count | rs1794066  | 2 | 113886350 | a | g | 0.4233 | 0.0042   | 0.0018 | 1.74E-02 | +++ | 3.37E-02 |
| WBC count | rs1794067  | 2 | 113886384 | a | g | 0.2199 | -0.0037  | 0.0023 | 1.09E-01 | 0   | 5.57E-01 |
| WBC count | rs1794068  | 2 | 113886503 | a | g | 0.2078 | -0.0063  | 0.0026 | 1.48E-02 | --- | 5.55E-01 |
| WBC count | rs1800930  | 2 | 113820530 | a | g | 0.2762 | -0.009   | 0.0025 | 2.68E-04 | -?- | 7.17E-01 |
| WBC count | rs1867761  | 2 | 113922983 | t | c | 0.328  | 0.0038   | 0.0029 | 1.91E-01 | +++ | 9.74E-01 |
| WBC count | rs1867828  | 2 | 113768620 | a | g | 0.3852 | 0.0038   | 0.0019 | 4.60E-02 | +++ | 7.01E-01 |
| WBC count | rs1867829  | 2 | 113839151 | a | g | 0.46   | 0.0039   | 0.0021 | 6.36E-02 | ++  | 7.81E-02 |
| WBC count | rs1867831  | 2 | 113773561 | t | c | 0.4248 | 1.00E-04 | 0.0025 | 9.80E-01 | +++ | 3.97E-01 |
| WBC count | rs1867834  | 2 | 113828099 | t | c | 0.4276 | 0.0039   | 0.0021 | 5.65E-02 | +++ | 9.69E-01 |
| WBC count | rs1900287  | 2 | 113797565 | a | g | 0.5339 | 1.00E-04 | 0.0025 | 9.62E-01 | -?+ | 8.78E-01 |

Table S1. Random-effects meta-analysis of MANTRA identified loci.

|           |           |   |           |   |   |        |           |        |          |     |          |
|-----------|-----------|---|-----------|---|---|--------|-----------|--------|----------|-----|----------|
| WBC count | rs1992761 | 2 | 113810286 | a | g | 0.113  | -0.0091   | 0.0035 | 9.09E-03 | ?-- | 3.68E-01 |
| WBC count | rs2029582 | 2 | 113863771 | t | c | 0.6258 | 6.00E-04  | 0.0018 | 7.34E-01 | ++  | 6.56E-04 |
| WBC count | rs2071459 | 2 | 113887483 | t | c | 0.567  | 7.00E-04  | 0.0021 | 7.23E-01 | ++  | 4.25E-01 |
| WBC count | rs2100071 | 2 | 113825386 | a | c | 0.522  | 0         | 0.0025 | 9.96E-01 | +-  | 8.73E-01 |
| WBC count | rs2121326 | 2 | 113846975 | c | g | 0.1516 | -0.0064   | 0.0028 | 2.14E-02 | --- | 9.58E-02 |
| WBC count | rs2121329 | 2 | 113852629 | a | c | 0.2608 | -0.0045   | 0.0022 | 3.56E-02 | --+ | 1.26E-01 |
| WBC count | rs2197578 | 2 | 113790553 | a | g | 0.5528 | -5.00E-04 | 0.0023 | 8.31E-01 | -+- | 7.85E-01 |
| WBC count | rs2248588 | 2 | 113898710 | t | c | 0.7957 | 0.0019    | 0.0067 | 7.76E-01 | ??+ | 1.00E+00 |
| WBC count | rs2248596 | 2 | 113898827 | a | g | 0.1956 | 8.00E-04  | 0.0047 | 8.66E-01 | ??+ | 1.00E+00 |
| WBC count | rs2248600 | 2 | 113898879 | a | g | 0.8494 | 0.0012    | 0.0076 | 8.75E-01 | ??+ | 1.00E+00 |
| WBC count | rs2248604 | 2 | 113898932 | a | c | 0.1594 | -0.0013   | 0.0071 | 8.55E-01 | ??- | 1.00E+00 |
| WBC count | rs2305150 | 2 | 113789316 | t | c | 0.5366 | 0.0015    | 0.0018 | 4.01E-01 | ++  | 2.62E-01 |
| WBC count | rs2305152 | 2 | 113763463 | a | c | 0.5444 | 0.0047    | 0.0021 | 2.41E-02 | ++  | 7.75E-01 |
| WBC count | rs2472188 | 2 | 113820814 | c | g | 0.3273 | -0.0056   | 0.0018 | 2.19E-03 | --- | 1.48E-01 |
| WBC count | rs2515401 | 2 | 113820476 | t | c | 0.4305 | -0.0014   | 0.0018 | 4.32E-01 | --+ | 2.15E-03 |
| WBC count | rs2515402 | 2 | 113820580 | a | c | 0.6096 | 0.0054    | 0.0019 | 4.64E-03 | +++ | 9.77E-02 |
| WBC count | rs2515404 | 2 | 113821117 | t | c | 0.3949 | -7.00E-04 | 0.0026 | 7.97E-01 | +-  | 5.16E-01 |
| WBC count | rs2515406 | 2 | 113822168 | t | c | 0.4163 | 6.00E-04  | 0.0027 | 8.22E-01 | +-  | 2.56E-01 |
| WBC count | rs2637988 | 2 | 113876779 | a | g | 0.3912 | 0.0019    | 0.0018 | 2.97E-01 | ++  | 3.96E-01 |
| WBC count | rs2853628 | 2 | 113880292 | c | g | 0.2497 | -0.0031   | 0.0026 | 2.35E-01 | ?-+ | 3.50E-01 |
| WBC count | rs2862772 | 2 | 113791482 | c | g | 0.5755 | 0.002     | 0.0018 | 2.55E-01 | ++  | 4.01E-01 |
| WBC count | rs2862774 | 2 | 113797677 | a | c | 0.5307 | 0.003     | 0.0026 | 2.37E-01 | ++  | 3.35E-02 |
| WBC count | rs2862853 | 2 | 113826759 | t | c | 0.3596 | -0.001    | 0.0024 | 6.82E-01 | ++  | 3.48E-01 |
| WBC count | rs2902452 | 2 | 113895516 | a | c | 0.3077 | 0.0047    | 0.0021 | 2.61E-02 | +++ | 7.71E-01 |
| WBC count | rs3087263 | 2 | 113885768 | a | g | 0.0757 | -0.0021   | 0.005  | 6.73E-01 | ?-- | 3.24E-01 |
| WBC count | rs3087266 | 2 | 113889100 | t | c | 0.5215 | 2.00E-04  | 0.002  | 9.11E-01 | +-  | 1.06E-01 |
| WBC count | rs3087270 | 2 | 113893308 | a | g | 0.5737 | 0.0031    | 0.0021 | 1.34E-01 | +++ | 8.43E-01 |
| WBC count | rs3087271 | 2 | 113895200 | a | c | 0.5097 | 0.0022    | 0.0026 | 3.97E-01 | ++  | 1.02E-01 |
| WBC count | rs3099479 | 2 | 113898461 | a | g | 0.7958 | 0.0018    | 0.0067 | 7.88E-01 | ??+ | 1.00E+00 |
| WBC count | rs315919  | 2 | 113876213 | t | g | 0.603  | 0.0017    | 0.0023 | 4.67E-01 | ??+ | 8.51E-01 |
| WBC count | rs315920  | 2 | 113873018 | t | c | 0.4157 | -0.0019   | 0.0028 | 4.92E-01 | --- | 8.39E-01 |
| WBC count | rs315921  | 2 | 113872051 | a | g | 0.1649 | -0.0028   | 0.0033 | 3.99E-01 | --- | 9.12E-01 |
| WBC count | rs315922  | 2 | 113862647 | t | c | 0.2908 | -0.0012   | 0.0031 | 7.11E-01 | --+ | 2.68E-02 |
| WBC count | rs315925  | 2 | 113865367 | t | c | 0.5852 | 0.0028    | 0.0025 | 2.51E-01 | ++  | 7.56E-02 |
| WBC count | rs315927  | 2 | 113866369 | t | c | 0.3416 | 0.0028    | 0.0018 | 1.30E-01 | ++  | 9.84E-03 |
| WBC count | rs315928  | 2 | 113868263 | t | c | 0.3954 | 8.00E-04  | 0.0029 | 7.77E-01 | --+ | 3.64E-02 |
| WBC count | rs315929  | 2 | 113869407 | t | c | 0.5832 | 0         | 0.0024 | 9.97E-01 | +-  | 7.48E-02 |
| WBC count | rs315931  | 2 | 113869843 | a | c | 0.3627 | -0.0022   | 0.0019 | 2.27E-01 | -+- | 5.10E-03 |

Table S1. Random-effects meta-analysis of MANTRA identified loci.

|           |            |   |           |   |   |        |           |        |          |     |          |
|-----------|------------|---|-----------|---|---|--------|-----------|--------|----------|-----|----------|
| WBC count | rs315932   | 2 | 113869977 | t | c | 0.5742 | 0.0024    | 0.0025 | 3.46E-01 | ++  | 1.03E-01 |
| WBC count | rs315935   | 2 | 113881365 | a | g | 0.8679 | -0.0024   | 0.0055 | 6.60E-01 | ??- | 1.00E+00 |
| WBC count | rs315936   | 2 | 113880947 | t | c | 0.4368 | -0.0033   | 0.0024 | 1.74E-01 | --+ | 3.17E-01 |
| WBC count | rs315937   | 2 | 113897154 | c | g | 0.7557 | 0.0027    | 0.0063 | 6.67E-01 | ??+ | 1.00E+00 |
| WBC count | rs315938   | 2 | 113896045 | a | t | 0.8452 | -0.0045   | 0.0049 | 3.62E-01 | ??- | 1.00E+00 |
| WBC count | rs315939   | 2 | 113895403 | a | c | 0.8433 | 1.00E-04  | 0.0074 | 9.89E-01 | ??+ | 1.00E+00 |
| WBC count | rs315940   | 2 | 113895305 | t | c | 0.8476 | -0.0043   | 0.0051 | 4.03E-01 | ??- | 1.00E+00 |
| WBC count | rs315941   | 2 | 113895235 | a | g | 0.8435 | 2.00E-04  | 0.0074 | 9.79E-01 | ??+ | 1.00E+00 |
| WBC count | rs315942   | 2 | 113895145 | t | g | 0.5534 | -0.003    | 0.002  | 1.36E-01 | --+ | 4.59E-01 |
| WBC count | rs315943   | 2 | 113894338 | a | g | 0.5797 | -0.0063   | 0.0021 | 3.15E-03 | --- | 4.61E-01 |
| WBC count | rs315944   | 2 | 113894187 | a | g | 0.147  | -0.0019   | 0.0078 | 8.08E-01 | ??- | 1.00E+00 |
| WBC count | rs315947   | 2 | 113893839 | a | g | 0.4581 | -0.003    | 0.0018 | 1.02E-01 | --- | 6.24E-01 |
| WBC count | rs315948   | 2 | 113893256 | t | c | 0.4328 | -0.0018   | 0.003  | 5.39E-01 | ++  | 1.00E-01 |
| WBC count | rs315949   | 2 | 113892774 | a | g | 0.3496 | 0.007     | 0.002  | 6.40E-04 | +++ | 5.20E-01 |
| WBC count | rs315951   | 2 | 113890586 | c | g | 0.399  | 0.0025    | 0.0018 | 1.62E-01 | +++ | 6.82E-01 |
| WBC count | rs315952   | 2 | 113890304 | t | c | 0.356  | 7.00E-04  | 0.0019 | 7.17E-01 | -+- | 1.98E-01 |
| WBC count | rs315955   | 2 | 113889430 | c | g | 0.9107 | -0.0127   | 0.0065 | 5.01E-02 | ??- | 1.00E+00 |
| WBC count | rs315957   | 2 | 113901313 | t | c | 0.7325 | -0.0046   | 0.0027 | 8.96E-02 | -?- | 1.11E-01 |
| WBC count | rs315958   | 2 | 113900851 | t | g | 0.5744 | -0.0043   | 0.002  | 2.94E-02 | --- | 2.56E-01 |
| WBC count | rs3180235  | 2 | 113820672 | a | g | 0.3279 | -0.0056   | 0.0018 | 2.39E-03 | --- | 1.56E-01 |
| WBC count | rs3180238  | 2 | 113820833 | t | c | 0.6116 | 0.0114    | 0.009  | 2.08E-01 | ??+ | 8.05E-01 |
| WBC count | rs3181052  | 2 | 113886049 | a | g | 0.4058 | 4.00E-04  | 0.0021 | 8.65E-01 | ++  | 4.36E-01 |
| WBC count | rs3181053  | 2 | 113886142 | t | g | 0.9512 | 0.0211    | 0.0085 | 1.35E-02 | ??+ | 1.00E+00 |
| WBC count | rs3213448  | 2 | 113879297 | a | g | 0.4212 | 5.00E-04  | 0.0021 | 8.24E-01 | ++  | 4.14E-01 |
| WBC count | rs35029104 | 2 | 113772596 | t | c | 0.0688 | 0.0041    | 0.0075 | 5.85E-01 | ??+ | 1.00E+00 |
| WBC count | rs3748914  | 2 | 113940681 | t | c | 0.4307 | -9.00E-04 | 0.0018 | 6.13E-01 | --+ | 5.49E-01 |
| WBC count | rs3752739  | 2 | 113788590 | c | g | 0.7706 | 0.0061    | 0.003  | 4.31E-02 | ??+ | 9.43E-01 |
| WBC count | rs3762494  | 2 | 113937563 | a | g | 0.7537 | -0.0071   | 0.0029 | 1.49E-02 | -+- | 3.81E-01 |
| WBC count | rs377086   | 2 | 113878715 | a | g | 0.1228 | 0.0028    | 0.0055 | 6.13E-01 | ??+ | 2.35E-01 |
| WBC count | rs380092   | 2 | 113888900 | a | t | 0.3581 | 8.00E-04  | 0.0019 | 6.54E-01 | ++  | 3.62E-01 |
| WBC count | rs3811050  | 2 | 113830173 | t | c | 0.3958 | 8.00E-04  | 0.0021 | 6.92E-01 | ++  | 2.76E-02 |
| WBC count | rs3811053  | 2 | 113830926 | t | c | 0.523  | 0.0059    | 0.0021 | 5.62E-03 | +++ | 4.59E-01 |
| WBC count | rs3827763  | 2 | 113831289 | a | g | 0.4054 | 0.0016    | 0.0019 | 4.07E-01 | ++  | 2.40E-01 |
| WBC count | rs396201   | 2 | 113891775 | t | c | 0.4582 | 0.0014    | 0.002  | 4.86E-01 | ++  | 2.48E-01 |
| WBC count | rs397211   | 2 | 113892141 | t | c | 0.4635 | 7.00E-04  | 0.0021 | 7.34E-01 | ++  | 3.43E-01 |
| WBC count | rs408392   | 2 | 113887458 | t | g | 0.3666 | -0.0027   | 0.0025 | 2.86E-01 | --+ | 7.57E-02 |
| WBC count | rs41334144 | 2 | 113766332 | t | c | 0.8487 | 0.0079    | 0.0086 | 3.61E-01 | ??+ | 1.00E+00 |
| WBC count | rs41411944 | 2 | 113922486 | t | c | 0.9068 | -0.0034   | 0.0068 | 6.17E-01 | ??- | 1.00E+00 |

Table S1. Random-effects meta-analysis of MANTRA identified loci.

|           |           |   |           |   |   |        |           |        |          |     |          |
|-----------|-----------|---|-----------|---|---|--------|-----------|--------|----------|-----|----------|
| WBC count | rs4145013 | 2 | 113830688 | a | g | 0.5081 | 0.0053    | 0.0018 | 3.77E-03 | +++ | 2.18E-01 |
| WBC count | rs419598  | 2 | 113887207 | t | c | 0.3546 | 0.0016    | 0.0027 | 5.57E-01 | ++- | 1.20E-01 |
| WBC count | rs423904  | 2 | 113887262 | t | c | 0.3659 | -0.0026   | 0.0025 | 3.06E-01 | --+ | 8.43E-02 |
| WBC count | rs4251955 | 2 | 113873871 | a | g | 0.0479 | -0.0126   | 0.0086 | 1.45E-01 | ??- | 1.00E+00 |
| WBC count | rs4251961 | 2 | 113874467 | t | c | 0.4359 | -0.0034   | 0.0022 | 1.12E-01 | --+ | 2.03E-03 |
| WBC count | rs4251967 | 2 | 113874968 | c | g | 0.0578 | -0.0119   | 0.0052 | 2.29E-02 | -?- | 6.80E-01 |
| WBC count | rs4251984 | 2 | 113877226 | a | g | 0.5098 | 0.0055    | 0.0026 | 3.49E-02 | +++ | 8.68E-01 |
| WBC count | rs4251985 | 2 | 113877413 | t | g | 0.3696 | -0.0031   | 0.0027 | 2.50E-01 | --+ | 1.09E-01 |
| WBC count | rs4251995 | 2 | 113881050 | t | g | 0.9859 | 0.0149    | 0.0171 | 3.83E-01 | ??+ | 1.00E+00 |
| WBC count | rs4252001 | 2 | 113883683 | a | g | 0.4541 | 0.0011    | 0.0021 | 6.12E-01 | ++- | 3.99E-01 |
| WBC count | rs4252012 | 2 | 113887349 | a | c | 0.046  | 0.0082    | 0.0089 | 3.54E-01 | ??+ | 1.00E+00 |
| WBC count | rs4252019 | 2 | 113889119 | t | c | 0.5219 | 5.00E-04  | 0.002  | 8.23E-01 | ++- | 1.01E-01 |
| WBC count | rs4252022 | 2 | 113890161 | a | g | 0.0562 | -0.0055   | 0.0082 | 5.04E-01 | ??- | 1.00E+00 |
| WBC count | rs4252033 | 2 | 113891842 | a | c | 0.8539 | -5.00E-04 | 0.0052 | 9.24E-01 | ??- | 1.00E+00 |
| WBC count | rs4252035 | 2 | 113892563 | t | c | 0.0319 | 0.0072    | 0.016  | 6.52E-01 | ??+ | 1.00E+00 |
| WBC count | rs4252036 | 2 | 113892964 | a | c | 0.017  | 0.0202    | 0.0149 | 1.76E-01 | ??+ | 1.00E+00 |
| WBC count | rs4252041 | 2 | 113890610 | t | c | 0.2199 | 0.0097    | 0.0075 | 1.98E-01 | ??- | 1.41E-01 |
| WBC count | rs431726  | 2 | 113889006 | t | g | 0.3182 | 0.0031    | 0.0025 | 2.19E-01 | ++- | 2.92E-01 |
| WBC count | rs432014  | 2 | 113888579 | t | c | 0.3062 | 5.00E-04  | 0.0024 | 8.20E-01 | ++- | 6.15E-03 |
| WBC count | rs4368340 | 2 | 113845080 | a | t | 0.5289 | -0.0032   | 0.0019 | 8.64E-02 | ++- | 2.40E-03 |
| WBC count | rs440286  | 2 | 113889469 | a | c | 0.2086 | -0.0036   | 0.0027 | 1.80E-01 | --- | 9.91E-01 |
| WBC count | rs442710  | 2 | 113887399 | a | g | 0.2094 | -0.0062   | 0.0026 | 1.82E-02 | --- | 5.68E-01 |
| WBC count | rs444413  | 2 | 113885826 | a | g | 0.2049 | -0.0057   | 0.0026 | 2.79E-02 | --- | 8.10E-01 |
| WBC count | rs446433  | 2 | 113887273 | a | g | 0.2069 | -0.0059   | 0.0026 | 2.26E-02 | --- | 6.25E-01 |
| WBC count | rs447713  | 2 | 113887672 | a | g | 0.5006 | 0.0057    | 0.0026 | 2.51E-02 | +++ | 8.12E-01 |
| WBC count | rs4496335 | 2 | 113844475 | t | c | 0.5066 | 0.0057    | 0.0022 | 8.85E-03 | ++- | 1.16E-02 |
| WBC count | rs451578  | 2 | 113888557 | a | g | 0.2049 | -0.0064   | 0.0026 | 1.48E-02 | --- | 4.27E-01 |
| WBC count | rs452204  | 2 | 113889061 | a | g | 0.5077 | -0.0045   | 0.0018 | 1.18E-02 | ++- | 1.17E-01 |
| WBC count | rs454078  | 2 | 113888793 | a | t | 0.4971 | 0.0058    | 0.0026 | 2.29E-02 | +++ | 8.01E-01 |
| WBC count | rs4848314 | 2 | 113839286 | a | g | 0.4534 | 0.0013    | 0.0024 | 6.05E-01 | ++- | 5.80E-02 |
| WBC count | rs4848316 | 2 | 113934451 | t | c | 0.4194 | -7.00E-04 | 0.0018 | 6.81E-01 | ++- | 7.63E-01 |
| WBC count | rs4849136 | 2 | 113748202 | t | c | 0.2951 | 8.00E-04  | 0.0023 | 7.24E-01 | ?-+ | 2.96E-01 |
| WBC count | rs4849142 | 2 | 113779875 | a | g | 0.5068 | 0.001     | 0.0019 | 6.06E-01 | ++- | 6.10E-02 |
| WBC count | rs4849143 | 2 | 113787356 | c | g | 0.5146 | 0.0011    | 0.0025 | 6.78E-01 | -+- | 8.09E-01 |
| WBC count | rs4849144 | 2 | 113800049 | a | g | 0.2431 | -7.00E-04 | 0.0025 | 7.90E-01 | ++- | 7.70E-01 |
| WBC count | rs4849147 | 2 | 113829236 | a | t | 0.2511 | -0.0022   | 0.0026 | 4.04E-01 | --- | 4.14E-01 |
| WBC count | rs4849148 | 2 | 113829522 | t | c | 0.3513 | 4.00E-04  | 0.0022 | 8.42E-01 | ++- | 9.80E-02 |
| WBC count | rs4849152 | 2 | 113848574 | a | g | 0.5245 | 0.0069    | 0.0019 | 2.38E-04 | +++ | 3.20E-01 |

Table S1. Random-effects meta-analysis of MANTRA identified loci.

|                  |                  |          |                  |          |          |               |                |               |                 |            |                 |
|------------------|------------------|----------|------------------|----------|----------|---------------|----------------|---------------|-----------------|------------|-----------------|
| WBC count        | rs4849153        | 2        | 113848654        | t        | c        | 0.5702        | -4.00E-04      | 0.002         | 8.20E-01        | ++         | 2.45E-02        |
| WBC count        | rs4849159        | 2        | 113925061        | t        | c        | 0.309         | 7.00E-04       | 0.0022        | 7.34E-01        | +--        | 2.63E-01        |
| WBC count        | rs4849160        | 2        | 113934085        | a        | g        | 0.261         | -0.0013        | 0.0022        | 5.48E-01        | ---        | 8.02E-01        |
| WBC count        | rs4849163        | 2        | 113935028        | t        | c        | 0.3166        | 0.0017         | 0.0021        | 4.36E-01        | +++        | 4.68E-01        |
| WBC count        | rs4849166        | 2        | 113939763        | a        | t        | 0.5418        | 0.0011         | 0.0018        | 5.29E-01        | ++         | 7.19E-01        |
| WBC count        | rs4849167        | 2        | 113940839        | c        | g        | 0.5217        | 4.00E-04       | 0.0018        | 8.09E-01        | ++         | 2.81E-01        |
| WBC count        | rs495282         | 2        | 113887294        | c        | g        | 0.2071        | -0.0059        | 0.0026        | 2.27E-02        | ---        | 6.25E-01        |
| WBC count        | rs495410         | 2        | 113887338        | a        | c        | 0.9392        | 0.0099         | 0.0049        | 4.22E-02        | ??+        | 6.81E-01        |
| WBC count        | rs579543         | 2        | 113889631        | a        | g        | 0.215         | -0.0022        | 0.0027        | 4.05E-01        | ---        | 9.34E-01        |
| WBC count        | rs6542108        | 2        | 113755190        | t        | c        | 0.3654        | 4.00E-04       | 0.0021        | 8.50E-01        | -+-        | 1.32E-01        |
| WBC count        | rs6542109        | 2        | 113756821        | t        | c        | 0.3766        | 0.001          | 0.002         | 6.26E-01        | -+-        | 9.79E-02        |
| WBC count        | rs6542111        | 2        | 113822559        | t        | c        | 0.0406        | 0.0165         | 0.0082        | 4.51E-02        | ??+        | 1.00E+00        |
| WBC count        | rs6542113        | 2        | 113859276        | a        | g        | 0.0707        | 0.0155         | 0.0055        | 4.85E-03        | ??+        | 4.72E-01        |
| WBC count        | rs6542114        | 2        | 113862825        | a        | g        | 0.0595        | -0.0109        | 0.0078        | 1.63E-01        | ??-        | 1.00E+00        |
| WBC count        | rs6542118        | 2        | 113912081        | a        | g        | 0.4871        | -0.0037        | 0.002         | 6.10E-02        | --         | 1.84E-01        |
| WBC count        | rs6708535        | 2        | 113833839        | t        | c        | 0.1678        | 0.0046         | 0.0042        | 2.72E-01        | ?-+        | 1.55E-01        |
| WBC count        | rs6710007        | 2        | 113780930        | a        | g        | 0.505         | 9.00E-04       | 0.0019        | 6.31E-01        | +--        | 5.94E-02        |
| WBC count        | rs6714534        | 2        | 113759330        | t        | c        | 0.3954        | -0.0018        | 0.0023        | 4.32E-01        | ++         | 1.54E-01        |
| WBC count        | rs6721033        | 2        | 113908086        | a        | c        | 0.3987        | 0.0045         | 0.002         | 2.38E-02        | +++        | 2.87E-01        |
| WBC count        | rs6722922        | 2        | 113841515        | t        | c        | 0.4936        | 0.0039         | 0.0022        | 6.88E-02        | ++         | 4.71E-04        |
| WBC count        | rs6723495        | 2        | 113922579        | t        | c        | 0.7273        | 0.001          | 0.0043        | 8.23E-01        | ??+        | 4.54E-01        |
| WBC count        | rs6724667        | 2        | 113789641        | a        | g        | 0.5307        | -0.0011        | 0.0025        | 6.53E-01        | -+-        | 4.42E-01        |
| WBC count        | rs6728590        | 2        | 113844600        | a        | g        | 0.5257        | -0.0042        | 0.0018        | 2.19E-02        | +--        | 7.79E-03        |
| WBC count        | rs6730516        | 2        | 113848961        | t        | c        | 0.4754        | 0.0071         | 0.0022        | 9.84E-04        | ++         | 9.52E-03        |
| WBC count        | rs6731551        | 2        | 113844553        | t        | c        | 0.6277        | 0.0013         | 0.0019        | 4.90E-01        | ++         | 1.74E-04        |
| <b>WBC count</b> | <b>rs6734238</b> | <b>2</b> | <b>113841030</b> | <b>a</b> | <b>g</b> | <b>0.5182</b> | <b>-0.0117</b> | <b>0.0021</b> | <b>2.37E-08</b> | <b>---</b> | <b>2.09E-01</b> |
| WBC count        | rs6738239        | 2        | 113850792        | a        | c        | 0.3446        | 0.0106         | 0.0021        | 3.63E-07        | +++        | 2.39E-01        |
| WBC count        | rs6738377        | 2        | 113850902        | c        | g        | 0.5289        | -0.004         | 0.0018        | 2.98E-02        | +--        | 1.21E-02        |
| WBC count        | rs6739883        | 2        | 113914312        | a        | g        | 0.1336        | 0.0022         | 0.0032        | 4.89E-01        | ++         | 6.48E-01        |
| WBC count        | rs6741180        | 2        | 113844384        | a        | g        | 0.3445        | 0.0102         | 0.0021        | 8.42E-07        | +++        | 2.48E-01        |
| WBC count        | rs6743171        | 2        | 113840058        | c        | g        | 0.3168        | 0.0079         | 0.0022        | 2.72E-04        | +++        | 5.69E-02        |
| WBC count        | rs6743376        | 2        | 113832333        | a        | c        | 0.7371        | 0.0122         | 0.0026        | 1.75E-06        | ??+        | 5.76E-01        |
| WBC count        | rs6744288        | 2        | 113783230        | a        | t        | 0.5023        | 4.00E-04       | 0.0018        | 8.11E-01        | +--        | 4.79E-02        |
| WBC count        | rs6744874        | 2        | 113783909        | a        | t        | 0.1543        | -0.0032        | 0.0037        | 3.89E-01        | -?-        | 6.47E-01        |
| WBC count        | rs6746979        | 2        | 113854120        | a        | t        | 0.335         | 0.0106         | 0.0021        | 5.59E-07        | +++        | 2.39E-01        |
| WBC count        | rs6750559        | 2        | 113841532        | a        | g        | 0.3589        | 0.0104         | 0.0021        | 9.57E-07        | +++        | 3.94E-01        |
| WBC count        | rs6754298        | 2        | 113896213        | a        | t        | 0.3063        | 0.0047         | 0.0021        | 2.80E-02        | +++        | 7.59E-01        |
| WBC count        | rs6754538        | 2        | 113777393        | c        | g        | 0.3001        | 0.0066         | 0.0039        | 9.15E-02        | ??+        | 1.00E+00        |

Table S1. Random-effects meta-analysis of MANTRA identified loci.

|           |           |   |           |   |   |        |           |        |          |     |          |
|-----------|-----------|---|-----------|---|---|--------|-----------|--------|----------|-----|----------|
| WBC count | rs6755354 | 2 | 113826072 | t | g | 0.4443 | 0.002     | 0.0021 | 3.48E-01 | +-- | 3.73E-01 |
| WBC count | rs6756735 | 2 | 113806121 | t | c | 0.3324 | -0.0082   | 0.0031 | 7.73E-03 | -?- | 3.66E-01 |
| WBC count | rs6758965 | 2 | 113791193 | t | c | 0.638  | 3.00E-04  | 0.0024 | 9.02E-01 | +?- | 1.21E-02 |
| WBC count | rs6759676 | 2 | 113836348 | t | c | 0.3562 | 0.0034    | 0.002  | 9.42E-02 | ++- | 4.01E-02 |
| WBC count | rs6760120 | 2 | 113932431 | t | c | 0.4236 | -2.00E-04 | 0.0019 | 9.13E-01 | --+ | 8.65E-01 |
| WBC count | rs6761276 | 2 | 113832312 | t | c | 0.5895 | -0.0027   | 0.002  | 1.74E-01 | --+ | 2.56E-02 |
| WBC count | rs724496  | 2 | 113922276 | a | g | 0.4256 | 2.00E-04  | 0.0027 | 9.28E-01 | --+ | 5.29E-01 |
| WBC count | rs7557928 | 2 | 113797968 | t | g | 0.445  | 5.00E-04  | 0.0023 | 8.44E-01 | ++  | 7.45E-01 |
| WBC count | rs7558672 | 2 | 113825303 | a | g | 0.1901 | -0.0085   | 0.0032 | 7.14E-03 | -?- | 4.79E-01 |
| WBC count | rs7561080 | 2 | 113864920 | a | g | 0.6021 | 0.0054    | 0.0023 | 1.94E-02 | +++ | 2.88E-01 |
| WBC count | rs7569284 | 2 | 113803563 | a | g | 0.5537 | 0.0011    | 0.0023 | 6.47E-01 | ++  | 8.43E-01 |
| WBC count | rs7570267 | 2 | 113828578 | a | g | 0.627  | 0.0029    | 0.002  | 1.52E-01 | ++  | 1.95E-01 |
| WBC count | rs7571656 | 2 | 113758863 | t | g | 0.5891 | -6.00E-04 | 0.002  | 7.40E-01 | ++  | 7.33E-02 |
| WBC count | rs7573950 | 2 | 113859645 | a | g | 0.101  | 0.0234    | 0.009  | 8.96E-03 | ??+ | 1.00E+00 |
| WBC count | rs7574159 | 2 | 113859761 | a | g | 0.3351 | 0.0101    | 0.0021 | 2.69E-06 | +++ | 2.61E-01 |
| WBC count | rs7574427 | 2 | 113860038 | a | g | 0.3084 | 0.0085    | 0.0022 | 1.22E-04 | +++ | 1.31E-01 |
| WBC count | rs7574787 | 2 | 113837416 | t | g | 0.624  | 0.009     | 0.0055 | 9.90E-02 | -?+ | 3.14E-02 |
| WBC count | rs7575934 | 2 | 113817334 | t | c | 0.4188 | -0.0069   | 0.0027 | 1.21E-02 | -?- | 1.94E-01 |
| WBC count | rs7583835 | 2 | 113754725 | a | c | 0.0463 | -0.0078   | 0.0136 | 5.66E-01 | ??- | 1.00E+00 |
| WBC count | rs7584409 | 2 | 113742734 | a | g | 0.4811 | -5.00E-04 | 0.0025 | 8.48E-01 | ?-+ | 8.32E-01 |
| WBC count | rs7593760 | 2 | 113753731 | a | g | 0.9537 | 0.0077    | 0.0136 | 5.71E-01 | ??+ | 1.00E+00 |
| WBC count | rs7595962 | 2 | 113934226 | t | c | 0.516  | -9.00E-04 | 0.0021 | 6.56E-01 | -+- | 2.26E-01 |
| WBC count | rs7599662 | 2 | 113825085 | t | c | 0.3882 | -4.00E-04 | 0.0025 | 8.74E-01 | -+- | 9.44E-01 |
| WBC count | rs7606584 | 2 | 113796484 | t | c | 0.186  | -6.00E-04 | 0.007  | 9.32E-01 | ??- | 1.00E+00 |
| WBC count | rs768627  | 2 | 113821653 | t | c | 0.4295 | -0.0014   | 0.0018 | 4.35E-01 | --+ | 1.37E-03 |
| WBC count | rs895495  | 2 | 113899758 | a | g | 0.464  | -0.0038   | 0.002  | 6.06E-02 | --+ | 2.16E-01 |
| WBC count | rs895496  | 2 | 113899025 | t | c | 0.3891 | 0.0024    | 0.002  | 2.45E-01 | ++  | 6.32E-02 |
| WBC count | rs895497  | 2 | 113763575 | a | g | 0.2718 | 0.004     | 0.0026 | 1.23E-01 | ?++ | 8.67E-02 |
| WBC count | rs9005    | 2 | 113891412 | a | g | 0.2583 | -0.0033   | 0.002  | 9.80E-02 | --- | 8.09E-01 |
| WBC count | rs921065  | 2 | 113825966 | t | c | 0.4131 | -3.00E-04 | 0.0018 | 8.47E-01 | --+ | 1.02E-02 |
| WBC count | rs928940  | 2 | 113877495 | t | g | 0.3068 | 2.00E-04  | 0.002  | 9.23E-01 | ++  | 3.00E-01 |
| WBC count | rs9308681 | 2 | 113781335 | c | g | 0.5484 | 6.00E-04  | 0.0024 | 8.13E-01 | ++  | 6.80E-01 |
| WBC count | rs9308682 | 2 | 113828425 | a | g | 0.3779 | 0.0027    | 0.0022 | 2.11E-01 | ++  | 1.86E-01 |
| WBC count | rs931471  | 2 | 113912693 | t | c | 0.3665 | 0.0051    | 0.0021 | 1.40E-02 | +++ | 3.25E-01 |
| WBC count | rs957200  | 2 | 113821336 | a | c | 0.182  | 0.0022    | 0.0026 | 3.85E-01 | +++ | 4.66E-01 |
| WBC count | rs957201  | 2 | 113821200 | t | c | 0.4283 | -0.0014   | 0.0018 | 4.51E-01 | --+ | 1.20E-03 |
| WBC count | rs9678578 | 2 | 113810947 | a | t | 0.5205 | -2.00E-04 | 0.0025 | 9.27E-01 | -0- | 9.82E-01 |
| WBC count | rs973635  | 2 | 113889134 | a | g | 0.4377 | -0.0026   | 0.002  | 1.93E-01 | +-- | 3.69E-01 |

Table S1. Random-effects meta-analysis of MANTRA identified loci.

|                  |                   |          |                  |          |          |               |                |               |                 |            |                 |
|------------------|-------------------|----------|------------------|----------|----------|---------------|----------------|---------------|-----------------|------------|-----------------|
| WBC count        | rs990524          | 2        | 113816481        | t        | c        | 0.363         | 2.00E-04       | 0.0025        | 9.41E-01        | -0+        | 9.73E-01        |
| WBC count        | rs996879          | 2        | 113822241        | a        | g        | 0.2204        | 0.0031         | 0.0032        | 3.41E-01        | +++        | 2.44E-01        |
| WBC count        | rs9973741         | 2        | 113853381        | a        | g        | 0.7481        | -0.0131        | 0.0034        | 1.45E-04        | -?-        | 2.20E-01        |
| WBC count        | rs9973878         | 2        | 113752761        | a        | g        | 0.1357        | 0.0052         | 0.0052        | 3.22E-01        | ??+        | 1.00E+00        |
| WBC count        | rs10169718        | 2        | 219103580        | a        | g        | 0.5134        | -0.0098        | 0.0018        | 7.67E-08        | --+        | 7.59E-02        |
| WBC count        | rs10182823        | 2        | 219107367        | a        | g        | 0.8973        | -4.00E-04      | 0.0083        | 9.62E-01        | ??-        | 1.00E+00        |
| WBC count        | rs1018288         | 2        | 219099260        | c        | g        | 0.7837        | 5.00E-04       | 0.0065        | 9.39E-01        | ??+        | 1.00E+00        |
| <b>WBC count</b> | <b>rs10932765</b> | <b>2</b> | <b>219099484</b> | <b>t</b> | <b>c</b> | <b>0.4251</b> | <b>-0.0106</b> | <b>0.0019</b> | <b>9.42E-09</b> | <b>---</b> | <b>4.55E-01</b> |
| WBC count        | rs11901011        | 2        | 219106136        | a        | g        | 0.0217        | 0.0149         | 0.0199        | 4.53E-01        | ??+        | 1.00E+00        |
| WBC count        | rs16858888        | 2        | 219090451        | t        | c        | 0.0885        | -0.0128        | 0.0094        | 1.72E-01        | ??-        | 1.00E+00        |
| WBC count        | rs17572109        | 2        | 219093934        | a        | g        | 0.2382        | -0.0068        | 0.0032        | 3.37E-02        | ?--        | 2.69E-01        |
| WBC count        | rs4674275         | 2        | 219097738        | a        | g        | 0.4084        | -0.0087        | 0.0018        | 9.10E-07        | --+        | 2.96E-02        |
| WBC count        | rs6436046         | 2        | 219098248        | t        | g        | 0.2184        | -0.0236        | 0.0227        | 2.99E-01        | ??-        | 1.00E+00        |
| WBC count        | rs6436047         | 2        | 219108913        | a        | c        | 0.4046        | -0.0091        | 0.0018        | 6.59E-07        | --+        | 2.62E-02        |
| WBC count        | rs6436048         | 2        | 219109033        | a        | g        | 0.5661        | 0.0087         | 0.0018        | 8.77E-07        | +++        | 3.15E-02        |
| WBC count        | rs6704974         | 2        | 219109391        | a        | g        | 0.1313        | -0.0024        | 0.0076        | 7.53E-01        | ??-        | 1.00E+00        |
| WBC count        | rs6742439         | 2        | 219098672        | a        | g        | 0.2163        | -5.00E-04      | 0.0065        | 9.39E-01        | ??-        | 1.00E+00        |
| WBC count        | rs6757318         | 2        | 219090422        | a        | g        | 0.784         | 8.00E-04       | 0.0065        | 9.02E-01        | ??+        | 1.00E+00        |
| WBC count        | rs7605980         | 2        | 219100869        | c        | g        | 0.5673        | 0.0087         | 0.0018        | 8.74E-07        | +++        | 3.15E-02        |
| WBC count        | rs9288536         | 2        | 219089616        | c        | g        | 0.1232        | -0.0011        | 0.0056        | 8.43E-01        | ??-        | 1.00E+00        |
| WBC count        | rs9288537         | 2        | 219096333        | c        | g        | 0.7003        | -0.0024        | 0.004         | 5.50E-01        | ??-        | 1.00E+00        |
| WBC count        | rs9679606         | 2        | 219107700        | a        | g        | 0.6942        | -0.0017        | 0.0059        | 7.72E-01        | ??-        | 1.00E+00        |
| WBC count        | rs9789363         | 2        | 219090365        | t        | c        | 0.6969        | -0.0015        | 0.0039        | 7.01E-01        | ??-        | 1.00E+00        |
| WBC count        | rs10456057        | 6        | 31245534         | a        | g        | 0.4735        | -0.0028        | 0.0031        | 3.66E-01        | --+        | 5.71E-01        |
| WBC count        | rs12111032        | 6        | 31242191         | a        | g        | 0.4782        | 0.0054         | 0.0027        | 4.95E-02        | ??+        | 3.92E-01        |
| WBC count        | rs12191877        | 6        | 31252925         | t        | c        | 0.4245        | 0.0039         | 0.0031        | 2.07E-01        | +++        | 5.68E-01        |
| WBC count        | rs12234123        | 6        | 31243604         | a        | g        | 0.2245        | -0.0045        | 0.0028        | 1.10E-01        | +++        | 2.07E-02        |
| WBC count        | rs12529015        | 6        | 31248262         | a        | g        | 0.1416        | -0.0058        | 0.0031        | 6.47E-02        | +++        | 7.21E-02        |
| WBC count        | rs13191343        | 6        | 31241109         | t        | c        | 0.3155        | 0.0054         | 0.0026        | 3.90E-02        | +++        | 6.08E-01        |
| WBC count        | rs13200569        | 6        | 31243615         | a        | g        | 0.3146        | -0.0033        | 0.0019        | 7.63E-02        | -+-        | 2.09E-01        |
| WBC count        | rs13203895        | 6        | 31244082         | t        | c        | 0.4222        | 0.004          | 0.0031        | 1.94E-01        | +++        | 9.02E-01        |
| WBC count        | rs13207315        | 6        | 31241127         | t        | c        | 0.4271        | -0.0034        | 0.0026        | 1.97E-01        | --+        | 3.25E-01        |
| WBC count        | rs13208617        | 6        | 31248819         | t        | c        | 0.4217        | 0.003          | 0.0031        | 3.26E-01        | +++        | 6.05E-01        |
| WBC count        | rs16899147        | 6        | 31255201         | a        | g        | 0.6685        | 0.0027         | 0.0026        | 3.07E-01        | +++        | 6.92E-02        |
| WBC count        | rs16899160        | 6        | 31256667         | a        | g        | 0.0655        | -0.0125        | 0.0046        | 6.92E-03        | ?--        | 7.63E-01        |
| WBC count        | rs2040748         | 6        | 31243785         | t        | g        | 0.3754        | 0.0042         | 0.002         | 3.91E-02        | +++        | 2.82E-04        |
| WBC count        | rs2074488         | 6        | 31240431         | t        | g        | 0.3562        | -0.0055        | 0.0024        | 2.01E-02        | --+        | 1.52E-02        |
| WBC count        | rs2074489         | 6        | 31240128         | t        | c        | 0.4071        | -0.0023        | 0.0019        | 2.40E-01        | -+-        | 2.03E-02        |

Table S1. Random-effects meta-analysis of MANTRA identified loci.

|           |           |   |          |   |   |        |         |        |          |     |          |
|-----------|-----------|---|----------|---|---|--------|---------|--------|----------|-----|----------|
| WBC count | rs2074491 | 6 | 31239896 | t | c | 0.8493 | 0.003   | 0.0098 | 7.64E-01 | +++ | 9.12E-01 |
| WBC count | rs2249741 | 6 | 31240712 | a | c | 0.3549 | -0.0105 | 0.0041 | 1.08E-02 | ??- | 1.00E+00 |
| WBC count | rs2249742 | 6 | 31240721 | t | c | 0.5109 | 0.0051  | 0.0017 | 3.17E-03 | ++- | 2.37E-08 |
| WBC count | rs2394963 | 6 | 31251462 | t | c | 0.4608 | -0.0018 | 0.0018 | 3.31E-01 | -+- | 4.27E-02 |
| WBC count | rs2395471 | 6 | 31240692 | a | g | 0.4747 | 0.0033  | 0.0017 | 4.92E-02 | ++  | 8.88E-02 |
| WBC count | rs2524042 | 6 | 31257160 | c | g | 0.5922 | -0.012  | 0.0024 | 4.98E-07 | --- | 4.31E-01 |
| WBC count | rs2524043 | 6 | 31257012 | a | g | 0.5902 | -0.0175 | 0.0028 | 8.24E-10 | --- | 1.51E-01 |
| WBC count | rs2524044 | 6 | 31256753 | t | g | 0.4573 | -0.0083 | 0.0024 | 4.50E-04 | --- | 6.39E-03 |
| WBC count | rs2524047 | 6 | 31256591 | a | g | 0.5906 | -0.0174 | 0.0028 | 8.57E-10 | --- | 1.47E-01 |
| WBC count | rs2524048 | 6 | 31256561 | t | c | 0.3832 | -0.0154 | 0.0028 | 5.89E-08 | --- | 2.40E-03 |
| WBC count | rs2524049 | 6 | 31255953 | c | g | 0.5814 | -0.0137 | 0.0025 | 2.18E-08 | --- | 3.20E-01 |
| WBC count | rs2524050 | 6 | 31255541 | t | c | 0.4065 | -0.0132 | 0.003  | 8.99E-06 | --- | 6.70E-03 |
| WBC count | rs2524051 | 6 | 31255500 | a | g | 0.5907 | -0.0175 | 0.0028 | 8.41E-10 | --- | 1.47E-01 |
| WBC count | rs2524052 | 6 | 31253996 | a | g | 0.3813 | -0.0055 | 0.0019 | 4.33E-03 | +-  | 7.24E-03 |
| WBC count | rs2524053 | 6 | 31252469 | t | g | 0.4984 | -0.0025 | 0.0019 | 2.02E-01 | +-  | 3.34E-04 |
| WBC count | rs2524054 | 6 | 31252396 | a | c | 0.2011 | -0.0077 | 0.0022 | 4.03E-04 | +-  | 5.57E-05 |
| WBC count | rs2524055 | 6 | 31252237 | a | c | 0.5899 | -0.0172 | 0.0029 | 1.70E-09 | --- | 9.47E-02 |
| WBC count | rs2524057 | 6 | 31251895 | a | g | 0.5922 | -0.012  | 0.0024 | 5.58E-07 | --- | 4.33E-01 |
| WBC count | rs2524059 | 6 | 31250823 | c | g | 0.2066 | -0.0024 | 0.0028 | 3.99E-01 | +-  | 7.55E-02 |
| WBC count | rs2524063 | 6 | 31248155 | a | g | 0.1072 | 0.0173  | 0.0028 | 4.05E-10 | +++ | 2.11E-01 |
| WBC count | rs2524067 | 6 | 31245821 | a | g | 0.4562 | 0.0121  | 0.0031 | 7.70E-05 | +++ | 6.02E-01 |
| WBC count | rs2524068 | 6 | 31245061 | t | g | 0.3804 | 0.0083  | 0.0026 | 1.38E-03 | 0   | 1.41E-02 |
| WBC count | rs2524069 | 6 | 31244789 | a | t | 0.4054 | 0.0135  | 0.0033 | 3.59E-05 | +++ | 8.67E-01 |
| WBC count | rs2524070 | 6 | 31244520 | a | g | 0.1551 | 0.0101  | 0.0024 | 3.69E-05 | ++  | 8.59E-03 |
| WBC count | rs2524074 | 6 | 31244021 | a | g | 0.5899 | 0.0088  | 0.0021 | 2.82E-05 | +++ | 2.32E-03 |
| WBC count | rs2524077 | 6 | 31243603 | t | c | 0.3468 | 0.0133  | 0.0028 | 1.42E-06 | ++  | 6.74E-05 |
| WBC count | rs2524078 | 6 | 31242649 | a | g | 0.45   | 0.0112  | 0.003  | 2.20E-04 | +++ | 9.03E-01 |
| WBC count | rs2524079 | 6 | 31242174 | a | g | 0.4084 | 0.0121  | 0.0019 | 1.97E-10 | +++ | 2.92E-01 |
| WBC count | rs2524082 | 6 | 31241761 | a | t | 0.4934 | 0.0074  | 0.0017 | 1.63E-05 | +++ | 1.24E-01 |
| WBC count | rs2524083 | 6 | 31241737 | t | c | 0.3452 | 0.0133  | 0.0028 | 2.66E-06 | ++  | 6.70E-05 |
| WBC count | rs2524084 | 6 | 31241639 | a | g | 0.478  | 0.0107  | 0.0018 | 2.53E-09 | +++ | 3.43E-01 |
| WBC count | rs2524094 | 6 | 31240041 | t | c | 0.5217 | 0.0033  | 0.0019 | 7.91E-02 | ++  | 1.63E-02 |
| WBC count | rs2844599 | 6 | 31256005 | c | g | 0.102  | 0.017   | 0.0028 | 1.85E-09 | +++ | 8.32E-02 |
| WBC count | rs2844600 | 6 | 31253771 | t | g | 0.3158 | 0.015   | 0.0028 | 1.21E-07 | ++  | 1.15E-03 |
| WBC count | rs2844603 | 6 | 31250854 | a | g | 0.2085 | -0.0026 | 0.0028 | 3.51E-01 | +-  | 6.60E-02 |
| WBC count | rs2844605 | 6 | 31248591 | a | c | 0.4656 | -0.0083 | 0.0017 | 1.13E-06 | --- | 1.80E-01 |
| WBC count | rs2844611 | 6 | 31243979 | a | t | 0.5905 | 0.0088  | 0.0021 | 3.07E-05 | ++  | 2.08E-03 |
| WBC count | rs2844612 | 6 | 31243971 | a | g | 0.2291 | -0.0086 | 0.0021 | 4.46E-05 | +-  | 2.29E-03 |



Table S1. Random-effects meta-analysis of MANTRA identified loci.

|                  |                  |          |                 |          |          |               |                |               |                 |            |                 |
|------------------|------------------|----------|-----------------|----------|----------|---------------|----------------|---------------|-----------------|------------|-----------------|
| WBC count        | rs2844613        | 6        | 31243846        | t        | g        | 0.4509        | -0.0067        | 0.0031        | 2.92E-02        | ?-+        | 2.01E-03        |
| WBC count        | rs2844615        | 6        | 31242959        | t        | c        | 0.3368        | 0.0135         | 0.0028        | 8.59E-07        | ++-        | 1.76E-04        |
| WBC count        | rs2844618        | 6        | 31242439        | t        | c        | 0.3377        | 0.0137         | 0.0028        | 6.38E-07        | ++-        | 2.22E-04        |
| WBC count        | rs2844619        | 6        | 31242223        | c        | g        | 0.31          | -0.0097        | 0.002         | 1.89E-06        | +--        | 1.55E-04        |
| WBC count        | rs2844621        | 6        | 31241537        | t        | c        | 0.4445        | -0.0051        | 0.002         | 9.73E-03        | --+        | 1.95E-02        |
| WBC count        | rs2844622        | 6        | 31240060        | a        | g        | 0.2562        | -0.0071        | 0.0021        | 5.14E-04        | +--        | 3.43E-03        |
| WBC count        | rs28481932       | 6        | 31242900        | a        | g        | 0.625         | 7.00E-04       | 0.0023        | 7.53E-01        | +?-        | 9.09E-03        |
| WBC count        | rs2853929        | 6        | 31255434        | t        | c        | 0.3101        | 0.0155         | 0.0029        | 5.99E-08        | ++-        | 2.39E-03        |
| WBC count        | rs2853930        | 6        | 31255424        | a        | c        | 0.6214        | -0.0153        | 0.003         | 2.35E-07        | ---        | 2.23E-01        |
| WBC count        | rs2853933        | 6        | 31254088        | t        | c        | 0.4906        | -0.0012        | 0.0021        | 5.74E-01        | +++        | 2.94E-03        |
| WBC count        | rs2853934        | 6        | 31253928        | a        | t        | 0.5945        | -0.0173        | 0.0028        | 8.77E-10        | ---        | 1.46E-01        |
| WBC count        | rs2853935        | 6        | 31253878        | t        | c        | 0.576         | -0.0059        | 0.0027        | 2.95E-02        | -?-        | 5.02E-01        |
| WBC count        | rs2853937        | 6        | 31252569        | t        | c        | 0.3787        | -0.0156        | 0.0028        | 3.36E-08        | --+        | 4.92E-03        |
| WBC count        | rs2853939        | 6        | 31250642        | t        | c        | 0.4989        | -0.003         | 0.0019        | 1.22E-01        | +++        | 1.16E-03        |
| WBC count        | rs2853943        | 6        | 31247871        | t        | c        | 0.4963        | 0.0021         | 0.0024        | 3.84E-01        | -?+        | 1.49E-01        |
| <b>WBC count</b> | <b>rs2853946</b> | <b>6</b> | <b>31247203</b> | <b>a</b> | <b>t</b> | <b>0.5198</b> | <b>-0.0139</b> | <b>0.0018</b> | <b>2.67E-14</b> | <b>---</b> | <b>4.37E-01</b> |
| WBC count        | rs2853948        | 6        | 31245573        | c        | g        | 0.1071        | 0.0176         | 0.0027        | 1.66E-10        | +++        | 3.29E-01        |
| WBC count        | rs3130693        | 6        | 31242859        | t        | c        | 0.5511        | -0.0021        | 0.0026        | 4.30E-01        | -?-        | 8.13E-01        |
| WBC count        | rs3130696        | 6        | 31243884        | a        | g        | 0.2691        | -0.0074        | 0.002         | 1.85E-04        | ---        | 6.18E-01        |
| WBC count        | rs3132485        | 6        | 31243389        | a        | c        | 0.4261        | -9.00E-04      | 0.0017        | 5.94E-01        | -0-        | 6.06E-01        |
| WBC count        | rs3132486        | 6        | 31243170        | a        | g        | 0.5518        | -0.003         | 0.0018        | 9.26E-02        | -+-        | 1.16E-01        |
| WBC count        | rs3132488        | 6        | 31242695        | t        | g        | 0.6175        | -0.004         | 0.0033        | 2.27E-01        | -?-        | 7.01E-01        |
| WBC count        | rs3132489        | 6        | 31242674        | t        | c        | 0.5637        | -5.00E-04      | 0.0019        | 7.90E-01        | +++        | 3.97E-01        |
| WBC count        | rs3132490        | 6        | 31242560        | a        | g        | 0.6104        | 0.0037         | 0.0025        | 1.37E-01        | +++        | 2.37E-02        |
| WBC count        | rs3132491        | 6        | 31242272        | t        | c        | 0.4201        | 0.0048         | 0.0025        | 5.85E-02        | +++        | 3.05E-02        |
| WBC count        | rs3134745        | 6        | 31242762        | t        | c        | 0.4455        | 0.0088         | 0.0033        | 8.54E-03        | +?-        | 2.61E-03        |
| WBC count        | rs3873374        | 6        | 31251311        | t        | c        | 0.4898        | 0.0045         | 0.0022        | 4.30E-02        | ??+        | 3.28E-01        |
| WBC count        | rs3873375        | 6        | 31251360        | t        | c        | 0.4643        | -0.0019        | 0.0018        | 2.85E-01        | -+-        | 1.04E-01        |
| WBC count        | rs3930575        | 6        | 31244654        | a        | g        | 0.1303        | -0.0047        | 0.0026        | 7.03E-02        | +--        | 4.57E-02        |
| WBC count        | rs3931670        | 6        | 31243767        | c        | g        | 0.2886        | 0.0061         | 0.0019        | 1.69E-03        | +++        | 6.06E-01        |
| WBC count        | rs4361609        | 6        | 31240635        | c        | g        | 0.1906        | 0.0044         | 0.0022        | 4.89E-02        | +++        | 9.48E-05        |
| WBC count        | rs4386816        | 6        | 31247135        | t        | c        | 0.4409        | -0.0042        | 0.0024        | 7.41E-02        | ---        | 2.68E-05        |
| WBC count        | rs4628144        | 6        | 31257104        | t        | c        | 0.4329        | 0.0017         | 0.0018        | 3.27E-01        | +++        | 8.48E-02        |
| WBC count        | rs5009853        | 6        | 31240636        | t        | c        | 0.2671        | -0.0031        | 0.0048        | 5.22E-01        | -+-        | 8.67E-01        |
| WBC count        | rs5010528        | 6        | 31241032        | a        | g        | 0.5863        | -0.0113        | 0.0028        | 6.92E-05        | ---        | 7.80E-01        |
| WBC count        | rs6457358        | 6        | 31239999        | a        | t        | 0.5449        | 0.0081         | 0.0039        | 3.82E-02        | +++        | 8.45E-01        |
| WBC count        | rs6457372        | 6        | 31247121        | a        | g        | 0.4975        | -0.0044        | 0.0017        | 1.11E-02        | ---        | 9.63E-01        |
| WBC count        | rs6906846        | 6        | 31245736        | a        | g        | 0.3114        | 0.0022         | 0.0018        | 2.30E-01        | +++        | 4.04E-02        |

Table S1. Random-effects meta-analysis of MANTRA identified loci.

|           |           |   |          |   |   |        |           |        |          |      |          |
|-----------|-----------|---|----------|---|---|--------|-----------|--------|----------|------|----------|
| WBC count | rs6913377 | 6 | 31243495 | a | g | 0.0711 | -7.00E-04 | 0.0045 | 8.78E-01 | ?-+  | 7.11E-01 |
| WBC count | rs6919409 | 6 | 31244532 | a | g | 0.0677 | -0.0109   | 0.0045 | 1.61E-02 | ?--  | 9.82E-01 |
| WBC count | rs6919908 | 6 | 31244960 | t | c | 0.4206 | 0.0033    | 0.0024 | 1.75E-01 | +?-  | 3.06E-02 |
| WBC count | rs6923313 | 6 | 31241370 | t | c | 0.5801 | -0.0067   | 0.0024 | 5.60E-03 | -?-  | 6.36E-01 |
| WBC count | rs7381988 | 6 | 31246703 | a | g | 0.5936 | 0.0044    | 0.0025 | 7.92E-02 | --+  | 9.90E-03 |
| WBC count | rs7382297 | 6 | 31247067 | t | g | 0.3092 | -0.001    | 0.0027 | 7.19E-01 | ++   | 1.23E-01 |
| WBC count | rs7382307 | 6 | 31247149 | a | g | 0.1298 | -0.0043   | 0.0026 | 9.09E-02 | +--  | 4.59E-02 |
| WBC count | rs7754443 | 6 | 31254263 | a | g | 0.4021 | 0.0018    | 0.0018 | 3.22E-01 | +++  | 7.98E-02 |
| WBC count | rs7755686 | 6 | 31247796 | c | g | 0.114  | -1.00E-04 | 0.0036 | 9.86E-01 | --+  | 3.68E-01 |
| WBC count | rs7759127 | 6 | 31240988 | t | g | 0.4004 | -0.011    | 0.0029 | 1.37E-04 | ---+ | 5.01E-04 |
| WBC count | rs7767581 | 6 | 31239855 | c | g | 0.248  | -0.0074   | 0.0021 | 3.73E-04 | +--  | 1.98E-04 |
| WBC count | rs7773175 | 6 | 31240959 | c | g | 0.585  | -0.0119   | 0.002  | 1.96E-09 | ---  | 1.75E-01 |
| WBC count | rs9264602 | 6 | 31237405 | t | c | 0.5731 | -0.0066   | 0.003  | 2.90E-02 | -?-  | 6.07E-01 |
| WBC count | rs9264603 | 6 | 31237437 | t | c | 0.4216 | 0.0051    | 0.0028 | 7.38E-02 | +?+  | 5.29E-01 |
| WBC count | rs9264604 | 6 | 31237449 | t | c | 0.4344 | 0.0049    | 0.003  | 1.06E-01 | +?+  | 6.36E-01 |
| WBC count | rs9264606 | 6 | 31237592 | a | c | 0.2397 | -0.0075   | 0.0021 | 3.40E-04 | +--  | 1.51E-04 |
| WBC count | rs9264608 | 6 | 31237660 | a | g | 0.2553 | -0.0082   | 0.0021 | 6.72E-05 | +--  | 7.19E-04 |
| WBC count | rs9264636 | 6 | 31238297 | t | c | 0.4458 | 0.0046    | 0.002  | 2.48E-02 | -+-  | 1.50E-06 |
| WBC count | rs9264647 | 6 | 31238613 | a | g | 0.2419 | -0.0082   | 0.0021 | 8.33E-05 | +--  | 2.05E-04 |
| WBC count | rs9264664 | 6 | 31239227 | t | c | 0.4264 | 0.0045    | 0.0021 | 3.54E-02 | -+-  | 5.31E-07 |
| WBC count | rs9264672 | 6 | 31239766 | t | c | 0.3186 | 0.0143    | 0.0028 | 3.45E-07 | +++  | 3.74E-04 |
| WBC count | rs9264679 | 6 | 31240663 | a | t | 0.5891 | 0.0044    | 0.0026 | 8.65E-02 | +++  | 3.80E-02 |
| WBC count | rs9264681 | 6 | 31240871 | c | g | 0.305  | 0.0025    | 0.0019 | 1.83E-01 | -+-  | 1.36E-01 |
| WBC count | rs9264731 | 6 | 31244068 | a | g | 0.5917 | 0.0046    | 0.0026 | 7.19E-02 | +++  | 4.50E-02 |
| WBC count | rs9264733 | 6 | 31244214 | c | g | 0.2797 | 0.0083    | 0.0025 | 7.66E-04 | +?+  | 5.97E-01 |
| WBC count | rs9264742 | 6 | 31244616 | t | c | 0.4047 | -0.0087   | 0.0037 | 2.06E-02 | ?-+  | 3.16E-02 |
| WBC count | rs9264745 | 6 | 31245478 | a | g | 0.6158 | 0.0037    | 0.0024 | 1.24E-01 | +++  | 2.92E-02 |
| WBC count | rs9264759 | 6 | 31248678 | t | c | 0.4067 | -0.0029   | 0.002  | 1.51E-01 | +--  | 5.88E-02 |
| WBC count | rs9348860 | 6 | 31252667 | t | c | 0.4748 | 0.0041    | 0.0026 | 1.21E-01 | +++  | 4.08E-02 |
| WBC count | rs9348861 | 6 | 31252722 | a | g | 0.6626 | 0.0044    | 0.0026 | 9.17E-02 | +++  | 4.41E-02 |
| WBC count | rs9348862 | 6 | 31252747 | t | c | 0.0626 | -0.0045   | 0.0048 | 3.43E-01 | ?--  | 6.17E-01 |
| WBC count | rs9366776 | 6 | 31256630 | a | g | 0.1425 | -0.0031   | 0.0026 | 2.27E-01 | -+-  | 1.12E-02 |
| WBC count | rs9368669 | 6 | 31248493 | t | c | 0.6627 | 0.0059    | 0.0032 | 6.68E-02 | +--  | 6.82E-02 |
| WBC count | rs9368670 | 6 | 31252882 | t | c | 0.3253 | -0.0037   | 0.0026 | 1.53E-01 | +++  | 3.38E-02 |
| WBC count | rs9368671 | 6 | 31254704 | t | c | 0.3252 | -0.0038   | 0.0026 | 1.46E-01 | +++  | 3.49E-02 |
| WBC count | rs9380232 | 6 | 31242741 | t | c | 0.0403 | -0.0026   | 0.0055 | 6.36E-01 | ?-+  | 1.80E-01 |
| WBC count | rs9380234 | 6 | 31248568 | a | g | 0.1492 | -0.0062   | 0.0032 | 5.61E-02 | -+-  | 6.14E-02 |
| WBC count | rs9380236 | 6 | 31254664 | a | g | 0.6842 | 0.0031    | 0.0028 | 2.66E-01 | +--  | 1.45E-02 |

Table S1. Random-effects meta-analysis of MANTRA identified loci.

|                  |                  |          |                  |          |          |               |                |               |                 |            |                 |
|------------------|------------------|----------|------------------|----------|----------|---------------|----------------|---------------|-----------------|------------|-----------------|
| WBC count        | rs9391714        | 6        | 31245080         | a        | g        | 0.1481        | -0.0059        | 0.0032        | 6.68E-02        | -+-        | 6.70E-02        |
| WBC count        | rs9394049        | 6        | 31244028         | a        | c        | 0.0937        | 0.0019         | 0.0038        | 6.25E-01        | ?++        | 7.73E-01        |
| WBC count        | rs9461680        | 6        | 31243347         | t        | c        | 0.4008        | -0.0035        | 0.002         | 8.64E-02        | --+        | 6.93E-02        |
| WBC count        | rs9461681        | 6        | 31251040         | a        | g        | 0.4077        | 0.0015         | 0.0017        | 3.99E-01        | --+        | 1.66E-01        |
| WBC count        | rs9461684        | 6        | 31253444         | t        | c        | 0.4404        | 0.001          | 0.003         | 7.44E-01        | +++        | 2.24E-05        |
| WBC count        | rs9468915        | 6        | 31250801         | a        | c        | 0.5258        | -0.006         | 0.0019        | 1.85E-03        | ---        | 9.64E-02        |
| WBC count        | rs9468919        | 6        | 31253866         | a        | g        | 0.1486        | 0.013          | 0.0031        | 3.20E-05        | +++        | 5.96E-01        |
| WBC count        | rs9468920        | 6        | 31254936         | a        | g        | 0.4072        | 0.0017         | 0.0018        | 3.36E-01        | +++        | 3.89E-02        |
| WBC count        | rs9468922        | 6        | 31255286         | a        | g        | 0.4359        | -4.00E-04      | 0.0017        | 8.32E-01        | +++        | 4.53E-01        |
| WBC count        | rs10094039       | 8        | 130589676        | a        | g        | 0.4504        | 0.0056         | 0.0017        | 1.31E-03        | +++        | 7.97E-03        |
| WBC count        | rs10103048       | 8        | 130602281        | a        | c        | 0.4571        | 0.008          | 0.0023        | 4.30E-04        | ??+        | 1.65E-02        |
| WBC count        | rs10107630       | 8        | 130603635        | t        | c        | 0.4953        | -0.006         | 0.0017        | 5.04E-04        | --+        | 2.30E-02        |
| WBC count        | rs10458304       | 8        | 130596459        | t        | c        | 0.3851        | -4.00E-04      | 0.0043        | 9.32E-01        | -?+        | 7.73E-01        |
| WBC count        | rs10956484       | 8        | 130588520        | a        | g        | 0.1551        | -0.0179        | 0.0032        | 2.44E-08        | -?-        | 2.49E-02        |
| WBC count        | rs11785889       | 8        | 130603247        | t        | c        | 0.4256        | 0.0073         | 0.0021        | 3.92E-04        | +++        | 1.79E-02        |
| WBC count        | rs11995855       | 8        | 130601919        | t        | c        | 0.971         | 0.0093         | 0.0199        | 6.40E-01        | ??+        | 1.00E+00        |
| WBC count        | rs13277237       | 8        | 130604563        | a        | g        | 0.497         | -0.0063        | 0.0017        | 2.47E-04        | ---        | 3.54E-02        |
| WBC count        | rs1368700        | 8        | 130600091        | a        | g        | 0.3388        | 0.0043         | 0.0018        | 1.80E-02        | +++        | 1.84E-03        |
| WBC count        | rs1433577        | 8        | 130595881        | a        | g        | 0.3429        | 0.0064         | 0.0019        | 5.67E-04        | 0          | 1.85E-02        |
| WBC count        | rs1433578        | 8        | 130601089        | t        | c        | 0.5297        | 0.0148         | 0.0028        | 9.77E-08        | +++        | 3.50E-03        |
| WBC count        | rs1433580        | 8        | 130603707        | t        | c        | 0.4096        | -0.0067        | 0.0018        | 2.33E-04        | ---        | 3.49E-02        |
| WBC count        | rs16904119       | 8        | 130593742        | t        | g        | 0.3902        | -0.0061        | 0.0019        | 1.24E-03        | ---        | 1.19E-02        |
| WBC count        | rs16904121       | 8        | 130600781        | t        | c        | 0.4246        | 0.0068         | 0.002         | 9.39E-04        | +++        | 4.76E-02        |
| WBC count        | rs17265074       | 8        | 130603007        | t        | g        | 0.0811        | -6.00E-04      | 0.004         | 8.88E-01        | ?+-        | 1.72E-01        |
| WBC count        | rs1821340        | 8        | 130605291        | c        | g        | 0.1665        | 0.0049         | 0.0041        | 2.34E-01        | -?+        | 4.21E-01        |
| WBC count        | rs1865223        | 8        | 130606476        | t        | g        | 0.5206        | -0.0044        | 0.0018        | 1.44E-02        | --+        | 1.01E-03        |
| WBC count        | rs2043405        | 8        | 130596548        | a        | g        | 0.1455        | 0.0031         | 0.0043        | 4.70E-01        | ??+        | 9.75E-01        |
| <b>WBC count</b> | <b>rs2163950</b> | <b>8</b> | <b>130597585</b> | <b>a</b> | <b>c</b> | <b>0.1404</b> | <b>-0.0167</b> | <b>0.0028</b> | <b>1.90E-09</b> | <b>---</b> | <b>8.93E-02</b> |
| WBC count        | rs2163951        | 8        | 130603357        | t        | c        | 0.5054        | -0.0034        | 0.0031        | 2.81E-01        | ---        | 8.37E-01        |
| WBC count        | rs6470743        | 8        | 130606310        | a        | g        | 0.327         | 0.0057         | 0.0019        | 2.61E-03        | +++        | 2.09E-02        |
| WBC count        | rs6982402        | 8        | 130589924        | t        | c        | 0.6347        | -0.001         | 0.0042        | 8.11E-01        | ??-        | 7.68E-01        |
| WBC count        | rs6982553        | 8        | 130589974        | a        | t        | 0.3543        | 0.0047         | 0.0018        | 9.56E-03        | +++        | 9.89E-04        |
| WBC count        | rs6986451        | 8        | 130589711        | a        | g        | 0.1445        | 0.0037         | 0.0042        | 3.77E-01        | ??+        | 7.47E-01        |
| WBC count        | rs7000289        | 8        | 130597230        | a        | g        | 0.5107        | -0.0054        | 0.0018        | 2.90E-03        | --+        | 4.87E-03        |
| WBC count        | rs7000320        | 8        | 130589906        | t        | c        | 0.4408        | 0.0067         | 0.0018        | 2.68E-04        | +++        | 2.64E-02        |
| WBC count        | rs7000372        | 8        | 130590017        | a        | g        | 0.5079        | -0.0053        | 0.0019        | 4.35E-03        | --+        | 2.45E-03        |
| WBC count        | rs7000917        | 8        | 130590087        | a        | g        | 0.9601        | 0.0015         | 0.006         | 7.99E-01        | -?+        | 6.35E-01        |
| WBC count        | rs7004211        | 8        | 130594056        | t        | c        | 0.631         | -7.00E-04      | 0.0043        | 8.72E-01        | ?+-        | 7.37E-01        |



Table S3. Credible Interval Statistics

| Trait       | SNP       | Chr | Position (b37) | Effect Allele | Other Allele | Study Number | log10(BF) | PPH   | Sample Size | Effect Direction | Genes        | set95*      |
|-------------|-----------|-----|----------------|---------------|--------------|--------------|-----------|-------|-------------|------------------|--------------|-------------|
| Neutrophils | rs7667376 | 4   | 74967890       | C             | T            | 3            | 11.12528  | 1     | 33743       | ++               | NA           | 0.52118827  |
| Neutrophils | rs1371798 | 4   | 74976781       | C             | T            | 3            | 9.94375   | 1     | 33753       | ++               | NA           | 0.997634695 |
| Neutrophils | rs1371799 | 4   | 74977837       | C             | T            | 3            | 10.9749   | 1     | 33753       | +-               | NA           | 0.889838606 |
| Neutrophils | rs1866755 | 4   | 74978340       | C             | T            | 3            | 10.27447  | 1     | 33705       | ++               | NA           | 0.963321226 |
| Neutrophils | rs2072633 | 6   | 31919578       | A             | G            | 3            | 3.44008   | 0.509 | 33698       | ---              | Several, HLA | 0.977220747 |
| Neutrophils | rs592229  | 6   | 31930441       | G             | T            | 3            | 5.91581   | 1     | 33737       | +-               | Several, HLA | 0.941088647 |
| Neutrophils | rs204989  | 6   | 32161852       | A             | G            | 3            | 3.12774   | 0.041 | 33716       | ---              | Several, HLA | 0.986900655 |
| Neutrophils | rs405875  | 6   | 32215188       | C             | T            | 3            | 3.44774   | 0.026 | 33743       | +++              | Several, HLA | 0.976511099 |
| Neutrophils | rs410283  | 6   | 32215198       | G             | T            | 3            | 3.65833   | 0.019 | 33753       | ---              | Several, HLA | 0.974006156 |
| Neutrophils | rs2515892 | 6   | 32215252       | G             | T            | 3            | 3.58835   | 0.025 | 33753       | ---              | Several, HLA | 0.975004576 |
| Neutrophils | rs3130309 | 6   | 32215472       | A             | G            | 3            | 3.22801   | 0.529 | 33753       | +-               | Several, HLA | 0.984631838 |
| Neutrophils | rs2395111 | 6   | 32215964       | C             | T            | 3            | 3.26049   | 0.02  | 32931       | +++              | Several, HLA | 0.983314935 |
| Neutrophils | rs3115575 | 6   | 32216891       | G             | T            | 3            | 3.73571   | 0.025 | 33753       | +++              | Several, HLA | 0.971611839 |
| Neutrophils | rs6457508 | 6   | 32216963       | C             | T            | 3            | 3.76889   | 0.013 | 33753       | ---              | Several, HLA | 0.970210081 |
| Neutrophils | rs6457510 | 6   | 32217046       | C             | T            | 3            | 3.22972   | 0.024 | 33753       | ---              | Several, HLA | 0.984196353 |
| Neutrophils | rs6936204 | 6   | 32217092       | C             | T            | 3            | 6.45169   | 0.048 | 33706       | +++              | Several, HLA | 0.728875097 |
| Neutrophils | rs9267971 | 6   | 32217185       | C             | T            | 3            | 3.79636   | 0.022 | 33597       | +++              | Several, HLA | 0.968697032 |
| Neutrophils | rs9267972 | 6   | 32217232       | A             | G            | 2            | 4.72678   | 0.016 | 26352       | ?--              | Several, HLA | 0.954820942 |
| Neutrophils | rs3115572 | 6   | 32220484       | C             | G            | 3            | 3.32271   | 0.487 | 33680       | +-               | Several, HLA | 0.981399393 |
| Neutrophils | rs3115571 | 6   | 32220918       | A             | G            | 3            | 3.08206   | 0.616 | 33753       | +-               | Several, HLA | 0.988222552 |
| Neutrophils | rs3130316 | 6   | 32221228       | C             | T            | 3            | 4.61145   | 0.027 | 33737       | +++              | Several, HLA | 0.965350572 |
| Neutrophils | rs3132931 | 6   | 32235895       | G             | T            | 3            | 2.97088   | 0.019 | 33744       | ---              | Several, HLA | 0.989328272 |
| Neutrophils | rs3096673 | 6   | 32238013       | C             | T            | 3            | 3.02775   | 0.021 | 33744       | ---              | Several, HLA | 0.989087816 |
| Neutrophils | rs1559873 | 6   | 32243129       | C             | T            | 3            | 2.96203   | 0.019 | 33717       | ---              | Several, HLA | 0.989564764 |
| Neutrophils | rs9268142 | 6   | 32256418       | C             | T            | 3            | 3.1193    | 0.02  | 33753       | ---              | Several, HLA | 0.987582941 |
| Neutrophils | rs3749966 | 6   | 32261507       | C             | T            | 3            | 2.94944   | 0.023 | 33744       | ---              | Several, HLA | 0.989794063 |
| Neutrophils | rs9268163 | 6   | 32270875       | C             | T            | 3            | 3.67587   | 0.02  | 33753       | +++              | Several, HLA | 0.972833169 |
| Neutrophils | rs3864301 | 6   | 32271955       | C             | T            | 3            | 3.26717   | 0.014 | 33753       | +++              | Several, HLA | 0.982845633 |
| Neutrophils | rs9268176 | 6   | 32274079       | C             | T            | 3            | 3.39956   | 0.023 | 33753       | +++              | Several, HLA | 0.978515431 |
| Neutrophils | rs7341300 | 6   | 32275027       | C             | T            | 3            | 3.37453   | 0.013 | 33753       | +++              | Several, HLA | 0.979747993 |
| Neutrophils | rs9268181 | 6   | 32276009       | C             | T            | 3            | 3.38306   | 0.013 | 33697       | ---              | Several, HLA | 0.979137764 |
| Neutrophils | rs9268182 | 6   | 32276027       | G             | T            | 3            | 3.0606    | 0.022 | 33753       | ---              | Several, HLA | 0.988518737 |
| Neutrophils | rs9268204 | 6   | 32279500       | C             | T            | 3            | 3.33732   | 0.018 | 33753       | +++              | Several, HLA | 0.980308116 |
| Neutrophils | rs6934429 | 6   | 32279622       | G             | T            | 3            | 3.40078   | 0.017 | 33743       | +++              | Several, HLA | 0.977868998 |
| Neutrophils | rs9268207 | 6   | 32280462       | C             | T            | 3            | 3.05808   | 0.02  | 33702       | +++              | Several, HLA | 0.988813208 |
| Neutrophils | rs1018434 | 6   | 32281360       | C             | T            | 3            | 3.26851   | 0.025 | 33738       | ---              | Several, HLA | 0.982369056 |
| Neutrophils | rs3129959 | 6   | 32375796       | A             | T            | 2            | 3.82824   | 0.017 | 26352       | ?++              | Several, HLA | 0.967085187 |
| Neutrophils | rs9268503 | 6   | 32377061       | C             | T            | 2            | 3.17613   | 0.025 | 26352       | ?--              | Several, HLA | 0.985430664 |
| Neutrophils | rs6932810 | 6   | 32380190       | A             | G            | 2            | 2.94422   | 0.029 | 26352       | ?++              | Several, HLA | 0.990020623 |
| Neutrophils | rs6918317 | 6   | 32381210       | C             | T            | 2            | 3.32915   | 0.016 | 26352       | ?++              | Several, HLA | 0.9808578   |
| Neutrophils | rs2239806 | 6   | 32411307       | C             | T            | 3            | 3.1711    | 0.055 | 33744       | ++               | Several, HLA | 0.985812664 |
| Neutrophils | rs1051336 | 6   | 32412592       | A             | G            | 3            | 3.20433   | 0.036 | 33713       | ---              | Several, HLA | 0.985044214 |
| Neutrophils | rs1041885 | 6   | 32412809       | A             | T            | 3            | 3.23663   | 0.034 | 33744       | +-               | Several, HLA | 0.98375915  |

Table S3. Credible Interval Statistics

|             |           |    |          |   |   |   |          |       |       |     |              |             |
|-------------|-----------|----|----------|---|---|---|----------|-------|-------|-----|--------------|-------------|
| Neutrophils | rs9286790 | 6  | 32439828 | A | G | 3 | 3.15656  | 0.027 | 33753 | +++ | Several, HLA | 0.986554952 |
| Neutrophils | rs602875  | 6  | 32573629 | A | G | 2 | 3.10547  | 1     | 26352 | ?-+ | Several, HLA | 0.987911363 |
| Neutrophils | rs2395225 | 6  | 32590624 | C | T | 2 | 3.12463  | 0.018 | 26352 | ?-- | Several, HLA | 0.987243891 |
| Neutrophils | rs4713581 | 6  | 32660023 | C | T | 2 | 3.28066  | 0.059 | 26352 | ?++ | Several, HLA | 0.981891006 |
| Neutrophils | rs2858310 | 6  | 32668323 | A | G | 3 | 3.16059  | 0.02  | 33753 | +++ | Several, HLA | 0.98618553  |
| Neutrophils | rs9469246 | 6  | 32692227 | G | T | 3 | 3.48349  | 0.109 | 33701 | -++ | Several, HLA | 0.975788823 |
| Neutrophils | rs445     | 7  | 92408370 | C | T | 3 | 10.52497 | 1     | 33744 | -++ | CDK6         | 0.999977503 |
| Neutrophils | rs4794822 | 17 | 38156712 | C | T | 3 | 28.91982 | 1     | 33753 | +-- | NA           | 0.874563179 |
| Neutrophils | rs8078723 | 17 | 38166879 | C | T | 3 | 28.06213 | 1     | 33693 | -++ | NA           | 0.995930339 |

Table S3. Credible Interval Statistics

| Trait     | SNP        | Chr | Position (b37) | Effect Allele | Other Allele | Study Number | log10 (BF) | PPH   | Sample Size | Effect Direction | Genes        | set95*      |
|-----------|------------|-----|----------------|---------------|--------------|--------------|------------|-------|-------------|------------------|--------------|-------------|
| Monocytes | rs1449263  | 2   | 182319301      | C             | T            | 3            | 19.23857   | 1     | 33729       | +--              | ITGA4        | 0.513404537 |
| Monocytes | rs2124440  | 2   | 182328214      | A             | G            | 3            | 19.1084    | 1     | 33681       | +++              | ITGA4        | 0.893847628 |
| Monocytes | rs1375493  | 2   | 182323766      | A             | G            | 3            | 18.55404   | 1     | 33745       | +++              | ITGA4        | 1           |
| Monocytes | rs9880192  | 3   | 128297569      | C             | G            | 3            | 8.30125    | 1     | 33745       | +--              | NA           | 0.958237747 |
| Monocytes | rs9839508  | 3   | 128310794      | A             | T            | 3            | 6.92642    | 1     | 33704       | -++              | NA           | 0.998662118 |
| Monocytes | rs9849126  | 3   | 128312069      | C             | T            | 3            | 5.30501    | 0.982 | 33708       | +++              | NA           | 0.999628688 |
| Monocytes | rs2047076  | 5   | 76058509       | C             | T            | 3            | 6.03105    | 1     | 33729       | +++              | NA           | 0.998865282 |
| Monocytes | rs1264376  | 6   | 30765579       | A             | C            | 3            | 3.99291    | 1     | 28260       | +--              | Several, HLA | 0.987763272 |
| Monocytes | rs1264344  | 6   | 30800577       | C             | T            | 3            | 4.0451     | 1     | 33693       | +--              | Several, HLA | 0.985309756 |
| Monocytes | rs2535326  | 6   | 30832063       | C             | T            | 3            | 4.12249    | 1     | 33728       | +--              | Several, HLA | 0.983486311 |
| Monocytes | rs2844654  | 6   | 30838688       | G             | T            | 3            | 4.02148    | 1     | 33729       | +--              | Several, HLA | 0.986991592 |
| Monocytes | rs1264333  | 6   | 30844314       | C             | T            | 3            | 4.08467    | 1     | 33729       | +--              | Several, HLA | 0.98443954  |
| Monocytes | rs2240804  | 6   | 30920890       | A             | G            | 3            | 4.46125    | 1     | 33729       | --+              | Several, HLA | 0.97929274  |
| Monocytes | rs3131012  | 6   | 31115441       | C             | T            | 3            | 5.00397    | 1     | 33729       | +--              | Several, HLA | 0.945313282 |
| Monocytes | rs2073717  | 6   | 31122126       | C             | G            | 3            | 4.65235    | 0.288 | 33671       | ---              | Several, HLA | 0.973796085 |
| Monocytes | rs3130456  | 6   | 31126252       | A             | C            | 3            | 4.29037    | 0.405 | 33729       | ---              | Several, HLA | 0.982446349 |
| Monocytes | rs3095239  | 6   | 31126790       | A             | G            | 3            | 4.74009    | 0.475 | 33621       | +++              | Several, HLA | 0.966295715 |
| Monocytes | rs1419880  | 6   | 31135197       | C             | T            | 3            | 6.51791    | 1     | 33745       | +--              | Several, HLA | 0.767942886 |
| Monocytes | rs6904669  | 6   | 31192796       | A             | G            | 3            | 3.87778    | 1     | 33728       | ++-              | Several, HLA | 0.9896044   |
| Monocytes | rs3130712  | 6   | 31209510       | C             | T            | 3            | 3.90702    | 1     | 33674       | -++              | Several, HLA | 0.988396482 |
| Monocytes | rs28570051 | 6   | 31210601       | C             | T            | 2            | 4.7051     | 1     | 15304       | +?+              | Several, HLA | 0.970273372 |
| Monocytes | rs3095254  | 6   | 31221668       | C             | G            | 3            | 6.81258    | 1     | 33745       | +++              | Several, HLA | 0.509456724 |
| Monocytes | rs3130441  | 6   | 31228565       | A             | G            | 3            | 4.31576    | 0.889 | 33745       | +++              | Several, HLA | 0.980915624 |
| Monocytes | rs2844623  | 6   | 31232543       | C             | T            | 3            | 6.21948    | 1     | 33720       | +--              | Several, HLA | 0.897962028 |
| Monocytes | rs1049281  | 6   | 31236567       | C             | T            | 2            | 4.6144     | 1     | 26360       | ?-+              | Several, HLA | 0.977024039 |
| Monocytes | rs9264636  | 6   | 31238297       | C             | T            | 3            | 5.11292    | 1     | 33745       | -+-              | Several, HLA | 0.928636566 |
| Monocytes | rs9264664  | 6   | 31239227       | C             | T            | 3            | 5.04802    | 1     | 33745       | +--              | Several, HLA | 0.937397437 |
| Monocytes | rs2524084  | 6   | 31241639       | A             | G            | 3            | 3.84627    | 0.969 | 33729       | +++              | Several, HLA | 0.990154951 |
| Monocytes | rs9264699  | 6   | 31241933       | A             | C            | 2            | 3.89501    | 0.106 | 26360       | ?-+              | Several, HLA | 0.98901242  |
| Monocytes | rs6919908  | 6   | 31244960       | C             | T            | 2            | 4.82581    | 1     | 16373       | +?+              | Several, HLA | 0.961984325 |
| Monocytes | rs2524064  | 6   | 31247817       | A             | G            | 2            | 4.88433    | 0.269 | 26360       | ?-+              | Several, HLA | 0.951323045 |
| Monocytes | rs2524053  | 6   | 31252469       | G             | T            | 3            | 4.0388     | 1     | 33745       | --+              | Several, HLA | 0.98616744  |
| Monocytes | rs2853928  | 6   | 31257511       | A             | C            | 3            | 4.8386     | 1     | 33745       | ++-              | Several, HLA | 0.956732173 |
| Monocytes | rs6457374  | 6   | 31272261       | C             | T            | 3            | 5.41726    | 1     | 33727       | -+-              | Several, HLA | 0.918463607 |
| Monocytes | rs10107630 | 8   | 130603635      | C             | T            | 3            | 14.3687    | 1     | 33745       | -++              | CCDC26       | 0.994867393 |
| Monocytes | rs13277237 | 8   | 130604563      | A             | G            | 3            | 15.9041    | 1     | 33728       | ---              | CCDC26       | 0.793234363 |
| Monocytes | rs4480083  | 8   | 130609320      | C             | T            | 3            | 13.95825   | 1     | 33745       | -++              | CCDC26       | 0.999230753 |
| Monocytes | rs4407843  | 8   | 130609368      | A             | C            | 2            | 15.28985   | 0.012 | 26360       | ?-+              | CCDC26       | 0.983640202 |
| Monocytes | rs2163952  | 8   | 130610389      | C             | T            | 3            | 15.92914   | 1     | 33697       | -++              | CCDC26       | 0.40804784  |
| Monocytes | rs1991866  | 8   | 130624105      | C             | G            | 3            | 15.30419   | 1     | 33598       | ---              | CCDC26       | 0.890008896 |

Table S3. Credible Interval Statistics

|           |            |   |           |   |   |   |          |       |       |     |               |             |
|-----------|------------|---|-----------|---|---|---|----------|-------|-------|-----|---------------|-------------|
| Monocytes | rs10980800 | 9 | 113915905 | C | T | 3 | 11.63069 | 1     | 33692 | -++ | RP11-202G18.1 | 0.943693203 |
| Monocytes | rs12346772 | 9 | 113920599 | A | G | 3 | 11.92453 | 0.999 | 33745 | --- | RP11-202G18.1 | 0.862140888 |
| Monocytes | rs12350763 | 9 | 113923723 | A | G | 3 | 12.55646 | 1     | 33745 | --- | RP11-202G18.1 | 0.262246809 |
| Monocytes | rs7034139  | 9 | 113924517 | A | C | 3 | 12.44428 | 1     | 33745 | +++ | RP11-202G18.1 | 0.46479586  |
| Monocytes | rs1330279  | 9 | 113926908 | A | G | 3 | 11.84052 | 1     | 33745 | +++ | RP11-202G18.1 | 0.912580323 |
| Monocytes | rs12337595 | 9 | 113927801 | A | G | 3 | 12.27785 | 1     | 33745 | --- | RP11-202G18.1 | 0.800936831 |
| Monocytes | rs10124626 | 9 | 113940107 | A | C | 3 | 11.40469 | 1     | 33745 | --- | RP11-202G18.1 | 0.992935828 |
| Monocytes | rs10123393 | 9 | 113941670 | C | T | 3 | 12.43457 | 1     | 33745 | -++ | RP11-202G18.1 | 0.662866549 |
| Monocytes | rs17812386 | 9 | 113942888 | A | G | 3 | 11.62563 | 1     | 33745 | +++ | RP11-202G18.1 | 0.974445688 |



Table S3. Credible Interval Statistics

| Trait | SNP        | Chr | Position (b37) | Effect Allele | Other Allele | Study Number | log10 (BF) | PPH   | Sample Size | Effect Direction | Genes        | set95*      |   |
|-------|------------|-----|----------------|---------------|--------------|--------------|------------|-------|-------------|------------------|--------------|-------------|---|
| WBC   | rs2518564  | 1   | 159062436      | A             | G            | 3            | 341.58519  | 1     | 51768       | +++              | DARC         | Inf         |   |
| WBC   | rs6734238  | 2   | 113841030      | A             | G            | 3            | 6.61886    | 0.028 | 52691       | ---              | IL1RN        | 0.680435948 | A |
| WBC   | rs12328368 | 2   | 113847144      | C             | G            | 3            | 5.82474    | 0.021 | 52702       | ---              | IL1RN        | 0.789747799 | A |
| WBC   | rs12329129 | 2   | 113847007      | A             | G            | 3            | 5.56842    | 0.037 | 52740       | +++              | IL1RN        | 0.850330308 | A |
| WBC   | rs6738239  | 2   | 113850792      | A             | C            | 3            | 5.34698    | 0.022 | 52700       | +++              | IL1RN        | 0.88671404  | A |
| WBC   | rs1446509  | 2   | 113851159      | A             | T            | 3            | 5.26256    | 0.028 | 52740       | ---              | IL1RN        | 0.916670276 | A |
| WBC   | rs6741180  | 2   | 113844384      | A             | G            | 3            | 5.02042    | 0.035 | 52740       | +++              | IL1RN        | 0.933823559 | A |
| WBC   | rs6746979  | 2   | 113854120      | A             | T            | 3            | 4.99966    | 0.026 | 52740       | +++              | IL1RN        | 0.950176176 | A |
| WBC   | rs6750559  | 2   | 113841532      | A             | G            | 3            | 4.95959    | 0.025 | 52693       | +++              | IL1RN        | 0.965087536 | A |
| WBC   | rs13382561 | 2   | 113863536      | A             | G            | 3            | 4.91913    | 0.037 | 52740       | ---              | IL1RN        | 0.978672461 | A |
| WBC   | rs6743376  | 2   | 113832333      | A             | C            | 2            | 4.70749    | 0.014 | 33230       | ++?              | IL1RN        | 0.987017286 | A |
| WBC   | rs7574159  | 2   | 113859761      | A             | G            | 3            | 4.43428    | 0.025 | 52740       | +++              | IL1RN        | 0.991465721 | A |
| WBC   | rs10171839 | 2   | 219051314      | A             | G            | 3            | 4.99431    | 0.71  | 52685       | -++              | ARPC2,TRNA   | 0.9604962   | B |
| WBC   | rs13026485 | 2   | 219057984      | C             | T            | 3            | 5.63031    | 0.011 | 52698       | +++              | ARPC2,TRNA   | 0.910468592 | B |
| WBC   | rs6752254  | 2   | 219058743      | C             | T            | 3            | 4.9914     | 0.026 | 52740       | ---              | ARPC2,TRNA   | 0.966542104 | B |
| WBC   | rs10206984 | 2   | 219066980      | C             | T            | 3            | 4.99748    | 0.039 | 52740       | +-               | ARPC2,TRNA   | 0.954409649 | B |
| WBC   | rs13384682 | 2   | 219069137      | A             | G            | 3            | 5.16233    | 0.056 | 52740       | -++              | ARPC2,TRNA   | 0.933189765 | B |
| WBC   | rs13393821 | 2   | 219076742      | C             | G            | 3            | 4.61738    | 0.155 | 52740       | +-               | ARPC2,TRNA   | 0.990878058 | B |
| WBC   | rs12694432 | 2   | 219082330      | A             | G            | 3            | 5.34854    | 0.049 | 52740       | +-               | ARPC2,TRNA   | 0.924228048 | B |
| WBC   | rs7578940  | 2   | 219083318      | G             | T            | 3            | 6.17796    | 0.026 | 52737       | +++              | ARPC2,TRNA   | 0.805936872 | B |
| WBC   | rs4674274  | 2   | 219089131      | A             | T            | 3            | 4.64791    | 0.167 | 52740       | -++              | ARPC2,TRNA   | 0.988322762 | B |
| WBC   | rs4674275  | 2   | 219097738      | A             | G            | 3            | 4.86409    | 0.093 | 52740       | +-               | ARPC2,TRNA   | 0.982434553 | B |
| WBC   | rs10932765 | 2   | 219099484      | C             | T            | 3            | 6.95452    | 0.025 | 52740       | +++              | ARPC2,TRNA   | 0.55536852  | B |
| WBC   | rs7605980  | 2   | 219100869      | C             | G            | 3            | 4.95231    | 0.099 | 52683       | -++              | ARPC2,TRNA   | 0.977924816 | B |
| WBC   | rs10169718 | 2   | 219103580      | A             | G            | 3            | 5.84272    | 0.048 | 52701       | +-               | ARPC2,TRNA   | 0.848868885 | B |
| WBC   | rs6436047  | 2   | 219108913      | A             | C            | 3            | 5.07854    | 0.146 | 52701       | +-               | ARPC2,TRNA   | 0.948278508 | B |
| WBC   | rs6436048  | 2   | 219109033      | A             | G            | 3            | 4.97763    | 0.097 | 52701       | -++              | ARPC2,TRNA   | 0.97239932  | B |
| WBC   | rs6738394  | 2   | 219110625      | A             | G            | 3            | 5.0964     | 0.097 | 52740       | +-               | ARPC2,TRNA   | 0.940889243 | B |
| WBC   | rs13392177 | 2   | 219112956      | C             | T            | 3            | 5.7574     | 0.029 | 52665       | +++              | ARPC2,TRNA   | 0.884143417 | B |
| WBC   | rs13430006 | 2   | 219113089      | G             | T            | 3            | 6.40768    | 0.016 | 52668       | ---              | ARPC2,TRNA   | 0.713035686 | B |
| WBC   | rs3731859  | 2   | 219124222      | A             | G            | 3            | 4.70781    | 0.024 | 52740       | +++              | ARPC2,TRNA   | 0.985581369 | B |
| WBC   | rs3806792  | 4   | 74965274       | C             | T            | 3            | 11.40926   | 1     | 52739       | +-               | NA           | 0.988197424 |   |
| WBC   | rs7667376  | 4   | 74967890       | C             | T            | 3            | 12.95485   | 1     | 52740       | -++              | NA           | 0.983622655 |   |
| WBC   | rs1371798  | 4   | 74976781       | C             | T            | 3            | 11.35837   | 1     | 52740       | -++              | NA           | 0.992266343 |   |
| WBC   | rs1371799  | 4   | 74977837       | C             | T            | 3            | 13.49611   | 1     | 52740       | +-               | NA           | 0.558752008 |   |
| WBC   | rs1866755  | 4   | 74978340       | C             | T            | 3            | 13.17081   | 1     | 52690       | -++              | NA           | 0.822943664 |   |
| WBC   | rs2853946  | 6   | 31247203       | A             | T            | 3            | 12.15511   | 0.009 | 52740       | ---              | HLA-B        | 0.996632812 | A |
| WBC   | rs45855    | 6   | 32189481       | A             | T            | 3            | 4.70607    | 0.009 | 51806       | +++              | Several, HLA | 0.990319437 | B |
| WBC   | rs9267972  | 6   | 32217232       | A             | G            | 2            | 6.0505     | 0.012 | 36352       | ?--              | Several, HLA | 0.93845529  | B |
| WBC   | rs3115572  | 6   | 32220484       | C             | G            | 3            | 5.38859    | 0.037 | 52673       | ---              | Several, HLA | 0.971244947 | B |
| WBC   | rs9268402  | 6   | 32341353       | A             | G            | 3            | 6.51568    | 0.006 | 52702       | +++              | Several, HLA | 0.866294331 | B |
| WBC   | rs9268473  | 6   | 32355683       | A             | G            | 3            | 5.5005     | 0.01  | 52739       | ---              | Several, HLA | 0.965853416 | B |

Table S3. Credible Interval Statistics

|     |            |   |           |   |   |   |          |       |       |     |              |             |   |
|-----|------------|---|-----------|---|---|---|----------|-------|-------|-----|--------------|-------------|---|
| WBC | rs7194     | 6 | 32412480  | A | G | 3 | 5.45412  | 0.017 | 41911 | +++ | Several, HLA | 0.968752176 | B |
| WBC | rs1051336  | 6 | 32412592  | A | G | 3 | 4.95743  | 0.014 | 52692 | --- | Several, HLA | 0.982602579 | B |
| WBC | rs1041885  | 6 | 32412809  | A | T | 3 | 4.85516  | 0.011 | 51806 | --- | Several, HLA | 0.986669768 | B |
| WBC | rs2227139  | 6 | 32413459  | A | G | 3 | 4.94958  | 0.024 | 52740 | +++ | Several, HLA | 0.983509715 | B |
| WBC | rs3763327  | 6 | 32413830  | C | G | 3 | 5.09542  | 0.017 | 52740 | +++ | Several, HLA | 0.98051656  | B |
| WBC | rs9286790  | 6 | 32439828  | A | G | 3 | 5.20455  | 0.015 | 52740 | +++ | Several, HLA | 0.974799402 | B |
| WBC | rs12194148 | 6 | 32444198  | G | T | 3 | 5.13929  | 0.854 | 52740 | +-- | Several, HLA | 0.979247412 | B |
| WBC | rs9378212  | 6 | 32445691  | C | T | 3 | 5.17552  | 0.762 | 52740 | +-- | Several, HLA | 0.976325605 | B |
| WBC | rs9378213  | 6 | 32448398  | G | T | 3 | 4.93964  | 0.781 | 52740 | -++ | Several, HLA | 0.984396325 | B |
| WBC | rs9391786  | 6 | 32448561  | A | G | 3 | 7.05769  | 0.026 | 52740 | --- | Several, HLA | 0.832892343 | B |
| WBC | rs5020946  | 6 | 32450089  | G | T | 3 | 4.85706  | 0.733 | 52710 | +-- | Several, HLA | 0.985939886 | B |
| WBC | rs9270657  | 6 | 32566021  | G | T | 3 | 5.8223   | 0.995 | 52740 | +-- | Several, HLA | 0.95652103  | B |
| WBC | rs602875   | 6 | 32573629  | A | G | 2 | 7.59229  | 1     | 36352 | ?-+ | Several, HLA | 0.398457786 | B |
| WBC | rs615672   | 6 | 32574171  | C | G | 3 | 4.90065  | 0.014 | 52614 | --- | Several, HLA | 0.985206805 | B |
| WBC | rs9271562  | 6 | 32590411  | A | G | 2 | 6.50348  | 0.01  | 36352 | ?-- | Several, HLA | 0.898771063 | B |
| WBC | rs2395225  | 6 | 32590624  | C | T | 2 | 7.23567  | 0.011 | 36352 | ?-- | Several, HLA | 0.573749876 | B |
| WBC | rs9271586  | 6 | 32590899  | G | T | 2 | 5.17311  | 0.169 | 36352 | ?-- | Several, HLA | 0.977843363 | B |
| WBC | rs9271850  | 6 | 32595060  | A | G | 2 | 7.1466   | 0.011 | 36352 | ?++ | Several, HLA | 0.716538075 | B |
| WBC | rs2395237  | 6 | 32690945  | A | C | 3 | 5.27583  | 0.012 | 51716 | --- | Several, HLA | 0.973167695 | B |
| WBC | rs9469246  | 6 | 32692227  | G | T | 3 | 4.84978  | 0.797 | 52673 | -++ | Several, HLA | 0.987390663 | B |
| WBC | rs1383264  | 6 | 32739967  | A | T | 3 | 5.77773  | 0.008 | 52640 | --- | Several, HLA | 0.962627951 | B |
| WBC | rs3117016  | 6 | 33095516  | A | G | 3 | 6.14184  | 0.035 | 52701 | +++ | Several, HLA | 0.912894237 | B |
| WBC | rs3117014  | 6 | 33095615  | C | T | 3 | 5.05724  | 0.214 | 52740 | -++ | Several, HLA | 0.981678898 | B |
| WBC | rs3117013  | 6 | 33095636  | A | G | 3 | 6.14164  | 0.018 | 52740 | --- | Several, HLA | 0.927010909 | B |
| WBC | rs3130234  | 6 | 33096009  | A | C | 3 | 4.77032  | 0.022 | 52740 | --- | Several, HLA | 0.989258646 | B |
| WBC | rs3117008  | 6 | 33096274  | A | G | 3 | 4.7826   | 0.029 | 52740 | +++ | Several, HLA | 0.988658285 | B |
| WBC | rs3117007  | 6 | 33096514  | C | G | 3 | 4.7267   | 0.014 | 52740 | +++ | Several, HLA | 0.989801637 | B |
| WBC | rs3117005  | 6 | 33096755  | A | G | 3 | 4.80485  | 0.023 | 52740 | --- | Several, HLA | 0.988040706 | B |
| WBC | rs3129207  | 6 | 33125312  | C | G | 3 | 6.04494  | 0.011 | 52699 | +++ | Several, HLA | 0.94975409  | B |
| WBC | rs9376090  | 6 | 135411228 | C | T | 3 | 8.98253  | 0.022 | 43711 | --- | HBS1L        | 0.95209774  | C |
| WBC | rs7776054  | 6 | 135418916 | A | G | 3 | 8.47363  | 0.054 | 52740 | +++ | HBS1L        | 0.988485197 | C |
| WBC | rs11759553 | 6 | 135422296 | A | T | 3 | 8.6132   | 0.895 | 52740 | -++ | HBS1L        | 0.981048367 | C |
| WBC | rs9373124  | 6 | 135423209 | C | T | 3 | 8.38179  | 0.767 | 52740 | +-- | HBS1L        | 0.994504523 | C |
| WBC | rs4895440  | 6 | 135426558 | A | T | 3 | 8.87397  | 0.969 | 52740 | -++ | HBS1L        | 0.970792843 | C |
| WBC | rs4895441  | 6 | 135426573 | A | G | 3 | 9.63521  | 0.165 | 52703 | +++ | HBS1L        | 0.86513885  | C |
| WBC | rs9389269  | 6 | 135427159 | C | T | 3 | 9.40127  | 0.276 | 52740 | +-- | HBS1L        | 0.928093506 | C |
| WBC | rs9402686  | 6 | 135427817 | A | G | 3 | 10.38729 | 0.055 | 52740 | --- | HBS1L        | 0.609604066 | C |
| WBC | rs6920211  | 6 | 135431318 | C | T | 3 | 9.77147  | 0.167 | 52732 | --- | HBS1L        | 0.757252163 | C |
| WBC | rs445      | 7 | 92408370  | C | T | 3 | 16.80458 | 1     | 52740 | -++ | CDK6         | 1           |   |
| WBC | rs2894479  | 8 | 130584161 | A | C | 2 | 6.64341  | 0.116 | 33223 | --? | CCDC26       | 0.950697794 |   |
| WBC | rs10956484 | 8 | 130588520 | A | G | 2 | 6.66953  | 0.15  | 32297 | --? | CCDC26       | 0.886495614 |   |
| WBC | rs2163950  | 8 | 130597585 | A | C | 3 | 7.74878  | 0.065 | 52740 | --- | CCDC26       | 0.818313608 |   |
| WBC | rs1433578  | 8 | 130601089 | C | T | 3 | 6.31136  | 0.593 | 52740 | +-- | CCDC26       | 0.980585995 |   |
| WBC | rs13263733 | 8 | 130661418 | A | G | 2 | 5.90041  | 0.026 | 36352 | ?-- | CCDC26       | 0.992188447 |   |

Table S3. Credible Interval Statistics

|     |            |    |          |   |   |   |          |       |       |     |       |             |
|-----|------------|----|----------|---|---|---|----------|-------|-------|-----|-------|-------------|
| WBC | rs2241245  | 17 | 38151014 | C | T | 3 | 30.26561 | 1     | 52740 | --- | PSMD3 | 0.47512314  |
| WBC | rs4065321  | 17 | 38143548 | C | T | 3 | 29.70093 | 1     | 52740 | --- | PSMD3 | 0.604580332 |
| WBC | rs4794822  | 17 | 38156712 | C | T | 3 | 29.64331 | 1     | 52740 | --- | PSMD3 | 0.71795243  |
| WBC | rs9915252  | 17 | 38145088 | C | G | 3 | 29.58448 | 0.029 | 52740 | +++ | PSMD3 | 0.816961774 |
| WBC | rs8073254  | 17 | 38149350 | C | G | 3 | 29.55371 | 0.034 | 52740 | +++ | PSMD3 | 0.909198989 |
| WBC | rs2305482  | 17 | 38140927 | A | C | 3 | 29.36374 | 0.018 | 52701 | +++ | PSMD3 | 0.968756451 |
| WBC | rs11658328 | 17 | 38149236 | C | T | 3 | 29.08263 | 1     | 52740 | --- | PSMD3 | 0.999932867 |

Variants encompassing the 95% credible region of an associated region, as identified using the top hits from the MANTRA analysis, are presented for each subtype. PPA = posterior probability of association; the probability that a SNP is truly associated with a phenotype. \*set95 = 95% credible set.

Table S4. Summarized eQTL Results

| Blood Cell GWAS SNP | Position (b37) | Blood Cell Trait | Relation To Esnp | R <sup>2</sup> | eQTL SNP  | chr | pos(hg18) | Tissue            | eQTL p-value | Transcript | Best eSNP For Transcript | Best eSNP p-value | R <sup>2</sup> (CEU) to Blood Cell GWAS SNP* |
|---------------------|----------------|------------------|------------------|----------------|-----------|-----|-----------|-------------------|--------------|------------|--------------------------|-------------------|----------------------------------------------|
| rs2853946           | 31247203       | WBC              | C_SentinelSNP    | 1              | rs2853946 | 6   | 31355182  | LCL (MuTHER)      | 7.53E-05     | BAT1       | rs206017                 | 2.06E-06          | >500kb                                       |
| rs2853946           | 31247203       | WBC              | Proxy:ASN,Rel22  | 0.645          | rs3094691 | 6   | 31382672  | LCL (MuTHER)      | 1.09E-06     | MICB       | rs2844498                | 4.06E-12          | 0.34                                         |
| rs2853946           | 31247203       | WBC              | Proxy:YRI,Rel22  | 0.554          | rs3130521 | 6   | 31304355  | LCL (MuTHER)      | 2.28E-09     | TCF19      | rs887464                 | 1.20E-14          | 0.333                                        |
| rs6936204           | 32217092       | Neutrophil       | C_SentinelSNP    | 1              | rs6936204 | 6   | 32325070  | Whole Blood**     | 0.00E+00     | HLA-DRB5   | rs9270986                | 0.00E+00          | 0.278                                        |
| rs6936204           | 32217092       | Neutrophil       | Proxy:YRI,Rel22  | 0.848          | rs1559873 | 6   | 32351107  | Whole Blood**     | 0.00E+00     | HLA-DRB5   | rs9270986                | 0.00E+00          | 0.057                                        |
| rs6936204           | 32217092       | Neutrophil       | Proxy:ASN,Rel22  | 0.653          | rs9268557 | 6   | 32497283  | Whole Blood**     | 0.00E+00     | HLA-DRB5   | rs9270986                | 0.00E+00          | 0.256                                        |
| rs6936204           | 32217092       | Neutrophil       | C_SentinelSNP    | 1              | rs6936204 | 6   | 32325070  | LCL (MuTHER)      | 1.06E-05     | ATP6V1G2   | rs3132454                | 4.90E-14          | >500kb                                       |
| rs6936204           | 32217092       | Neutrophil       | Proxy:ASN,Rel22  | 1              | rs3130320 | 6   | 32331236  | LCL (MuTHER)      | 3.01E-06     | ATP6V1G2   | rs3132454                | 4.90E-14          | >500kb                                       |
| rs6936204           | 32217092       | Neutrophil       | Proxy:YRI,H3     | 0.781          | rs3096674 | 6   | 32346197  | LCL (MuTHER)      | 1.13E-06     | HLA-DPB1   | rs7772134                | 0.00E+00          | >500kb                                       |
| rs3095254           | 31221668       | Monocyte         | Proxy:ASN,Rel22  | 0.565          | rs879882  | 6   | 31247431  | LCL (MuTHER)      | 2.25E-10     | TCF19      | rs887464                 | 1.20E-14          | 0.198                                        |
| rs3095254           | 31221668       | Monocyte         | Proxy:YRI,Rel22  | 0.737          | rs3130409 | 6   | 31321790  | LCL (MuTHER)      | 2.00E-06     | TCF19      | rs887464                 | 1.20E-14          | 0.301                                        |
| rs3095254           | 31221668       | Monocyte         | C_SentinelSNP    | 1              | rs3095254 | 6   | 31329647  | LCL (MuTHER)      | 1.54E-12     | TCF19      | rs887464                 | 1.20E-14          | 0.371                                        |
| rs1449263           | 182319301      | Monocyte         | Proxy:YRI,Rel22  | 0.539          | rs1449260 | 2   | 182041692 | Monocytes         | 4.16E-13     | ITGA4      | rs2124440                | 0.00E+00          | 0.329                                        |
| rs1449263           | 182319301      | Monocyte         | Proxy:ASN,H3     | 0.983          | rs6740847 | 2   | 182016597 | Monocytes (CD14+) | 0.00E+00     | ITGA4      | rs1449263                | 0.00E+00          | 0.967                                        |
| rs1449263           | 182319301      | Monocyte         | C_SentinelSNP    | 1              | rs1449263 | 2   | 182027546 | Monocytes (CD14+) | 0.00E+00     | ITGA4      | rs1449263                | 0.00E+00          | 1-sameSNP                                    |

Table 6. Summarized results of the eQTL analysis are reported (all cis). \*Not in HapMap build, \*\* Pax Gene Whole Blood (Mehta). The final R<sup>2</sup> column includes only European ancestry tissue types.
